# Supplementary material
Source: publisher figshare collection journal article supplement (https://acs.figshare.com/ndownloader/files/13710584)
Supplement: Supplementary file 1 [file 13710584]

Supporting Information for:

# Chemical and Electrochemical Properties of [Cp\*Rh] Complexes Supported by a Hybrid Phosphine-Pyridine Ligand

*Julie A. Hopkins, Davide Lionetti, Victor W. Day, and James D. Blakemore\**

Department of Chemistry, University of Kansas, 1251 Wescoe Hall Drive,  
Lawrence, Kansas 66045, United States

\*E-mail: blakemore@ku.edu (J.D.B.)

|                                                                                            |     |
|--------------------------------------------------------------------------------------------|-----|
| <b>Figure S1.</b> Numbering scheme for complex <b>1-Cl</b>                                 | S3  |
| <b>Figure S2.</b> Numbering scheme for complex <b>2</b>                                    | S3  |
| <b>Figure S3.</b> Numbering scheme for complex <b>3</b>                                    | S4  |
| <b>NMR Spectra</b>                                                                         | S5  |
| <b>Figure S4.</b> $^1\text{H}$ NMR spectrum of <b>1-Cl</b>                                 | S5  |
| <b>Figure S5.</b> $^{13}\text{C}\{^1\text{H}\}$ NMR spectrum of <b>1-Cl</b>                | S6  |
| <b>Figure S6.</b> $^{31}\text{P}\{^1\text{H}\}$ NMR spectrum of <b>1-Cl</b>                | S7  |
| <b>Figure S7.</b> $^{19}\text{F}$ NMR spectrum of <b>1-Cl</b>                              | S8  |
| <b>Figure S8.</b> COSY NMR spectrum of <b>1-Cl</b>                                         | S9  |
| <b>Figure S9.</b> HMBC NMR spectrum of <b>1-Cl</b>                                         | S10 |
| <b>Figure S10.</b> HSQC NMR spectrum of <b>1-Cl</b>                                        | S11 |
| <b>Figure S11.</b> NOESY NMR spectrum of <b>1-Cl</b>                                       | S12 |
| <b>Figure S12.</b> $^1\text{H}$ NMR spectrum of <b>2</b>                                   | S13 |
| <b>Figure S13.</b> $^{13}\text{C}\{^1\text{H}\}$ NMR spectrum of <b>2</b>                  | S14 |
| <b>Figure S14.</b> $^{31}\text{P}\{^1\text{H}\}$ NMR spectrum of <b>2</b>                  | S15 |
| <b>Figure S15.</b> COSY NMR spectrum of <b>2</b>                                           | S16 |
| <b>Figure S16.</b> HMBC NMR spectrum of <b>2</b>                                           | S17 |
| <b>Figure S17.</b> HSQC NMR spectrum of <b>2</b>                                           | S18 |
| <b>Figure S18.</b> NOESY NMR spectrum of <b>2</b>                                          | S19 |
| <b>Figure S19.</b> $^1\text{H}$ NMR spectrum of <b>3</b>                                   | S20 |
| <b>Figure S20.</b> $^{13}\text{C}\{^1\text{H}\}$ NMR spectrum of <b>3</b>                  | S21 |
| <b>Figure S21.</b> $^{31}\text{P}\{^1\text{H}\}$ NMR spectrum of <b>3</b>                  | S22 |
| <b>Figure S22.</b> $^{31}\text{P}$ NMR spectrum of <b>3</b>                                | S23 |
| <b>Figure S23.</b> $^{19}\text{F}$ NMR spectrum of <b>3</b>                                | S24 |
| <b>Figure S24.</b> COSY NMR spectrum of <b>3</b>                                           | S25 |
| <b>Figure S25.</b> HMBC NMR spectrum of <b>3</b>                                           | S26 |
| <b>Figure S26.</b> HSQC NMR spectrum of <b>3</b>                                           | S27 |
| <b>Figure S27.</b> NOESY NMR spectrum of <b>3</b>                                          | S28 |
| <b>Figure S28.</b> $^1\text{H}$ NMR spectrum of <b>1-NCCH<sub>3</sub></b>                  | S29 |
| <b>Figure S29.</b> $^{13}\text{C}$ NMR spectrum of <b>1-NCCH<sub>3</sub></b>               | S30 |
| <b>Figure S30.</b> $^{31}\text{P}\{^1\text{H}\}$ NMR spectrum of <b>1-NCCH<sub>3</sub></b> | S31 |
| <b>Figure S31.</b> $^{19}\text{F}$ NMR spectrum of <b>1-NCCH<sub>3</sub></b>               | S32 |

|                                                                                                                          |     |
|--------------------------------------------------------------------------------------------------------------------------|-----|
| <b>Figure S32.</b> $^{31}\text{P}\{^1\text{H}\}$ NMR spectrum chemical reduction of <b>3</b>                             | S33 |
| <b>Figure S33.</b> $^1\text{H}$ NMR spectrum bulk electrolysis of <b>1-NCCH<sub>3</sub></b> with acid                    | S34 |
| <b>Figure S34.</b> $^1\text{H}$ NMR spectrum (bulk electrolysis of <b>1-Cl</b> with acid                                 | S35 |
| <b>Figure S35.</b> $^1\text{H}$ NMR spectrum chemical reduction of <b>3</b> with acid                                    | S36 |
| <b>Figure S36.</b> $^{31}\text{P}\{^1\text{H}\}$ NMR spectrum chemical reduction of <b>3</b> with acid                   | S37 |
| <br><b>UV-Vis Spectra</b>                                                                                                | S38 |
| <b>Figure S37.</b> UV-Vis spectra of <b>1-Cl</b> , <b>2</b> , and <b>3</b> in $\text{CH}_3\text{CN}$                     | S38 |
| <b>Figure S38.</b> UV-Vis spectra of bulk electrolysis aliquot of <b>3</b>                                               | S39 |
| <b>Figure S39.</b> UV-Vis spectra of bulk electrolysis aliquot of <b>1-NCCH<sub>3</sub></b> w/ acid                      | S40 |
| <br><b>Electrochemistry</b>                                                                                              | S41 |
| <b>Figure S40.</b> CV data for <b>1-Cl</b>                                                                               | S41 |
| <b>Figure S41.</b> Scan rate dependence for <b>1-Cl</b>                                                                  | S42 |
| <b>Figure S42.</b> Scan rate dependence for <b>1-Cl</b>                                                                  | S43 |
| <b>Figure S43.</b> Cyclic voltammetry of <b>1-NCCH<sub>3</sub></b>                                                       | S44 |
| <b>Figure S44.</b> Scan rate dependence for <b>1-NCCH<sub>3</sub></b>                                                    | S45 |
| <b>Figure S45.</b> CV data for <b>2</b>                                                                                  | S46 |
| <b>Figure S46.</b> Scan rate dependence for <b>2</b> .                                                                   | S47 |
| <b>Figure S47.</b> CV of titration of <b>1-NCCH<sub>3</sub></b> with $[\text{nBu}_4\text{N}][\text{Cl}]$                 | S48 |
| <b>Figure S48.</b> CV of titration of $[\text{nBu}_4\text{N}][\text{PF}_6]$ with $[\text{nBu}_4\text{N}][\text{Cl}]$     | S49 |
| <b>Figure S49.</b> Linear regression of $i_{\text{pa}}$ vs. concentration of $[\text{nBu}_4\text{N}][\text{Cl}]$         | S50 |
| <b>Figure S50.</b> CV of chloride oxidation region of <b>2</b>                                                           | S51 |
| <b>Figure S51.</b> CV of chloride oxidation region of <b>1-NCCH<sub>3</sub></b>                                          | S52 |
| <b>Figure S52.</b> CV data for <b>3</b>                                                                                  | S53 |
| <b>Figure S53.</b> CV data for <b>3</b> at increased scan rates                                                          | S54 |
| <b>Figure S54.</b> CV data for PQN                                                                                       | S55 |
| <b>Figure S55.</b> CV data for <b>1-Cl</b> with $[\text{Et}_3\text{NH}]^+/\text{Et}_3\text{N}$                           | S56 |
| <b>Figure S56.</b> CV of electrode background following CV of <b>1</b> with acid                                         | S57 |
| <b>Figure S57.</b> Bulk electrolysis data blank $[\text{Et}_3\text{NH}]\text{Br}$                                        | S58 |
| <b>Figure S58.</b> Bulk electrolysis data for <b>3</b> .                                                                 | S59 |
| <b>Figure S59.</b> Bulk electrolysis data for <b>1-NCCH<sub>3</sub></b> with $[\text{Et}_3\text{NH}]^+ \cdot \text{OTf}$ | S60 |
| <b>Figure S60.</b> Bulk electrolysis data for <b>1-Cl</b> with $[\text{Et}_3\text{NH}]^+ \cdot \text{OTf}$               | S61 |
| <br><b>Crystallographic Information</b>                                                                                  | S62 |
| <i>Refinement Details</i>                                                                                                | S62 |
| <b>Table S1.</b> Crystal and Refinement Data                                                                             | S63 |
| <b>Table S2.</b> Selected Bond Lengths                                                                                   | S64 |
| <b>Figure S61.</b> Full solid-state structure of <b>1-Cl</b> .                                                           | S65 |
| <b>Figure S62.</b> Full solid-state structure of <b>2</b> .                                                              | S66 |
| <b>Figure S63.</b> Full solid-state structure of <b>3</b> .                                                              | S67 |
| <br><b>References</b>                                                                                                    | S68 |

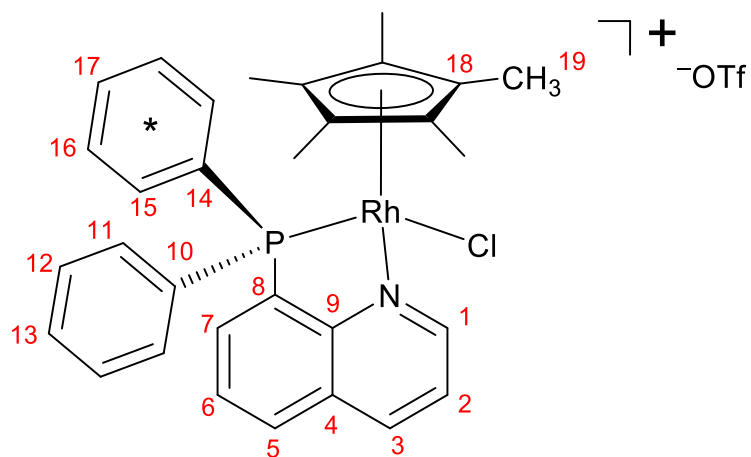

**Figure S1.** Numbering scheme for assignment of NMR data for complex **1-Cl** (\* in ring denotes phenyl group closest to Cp\* ring).

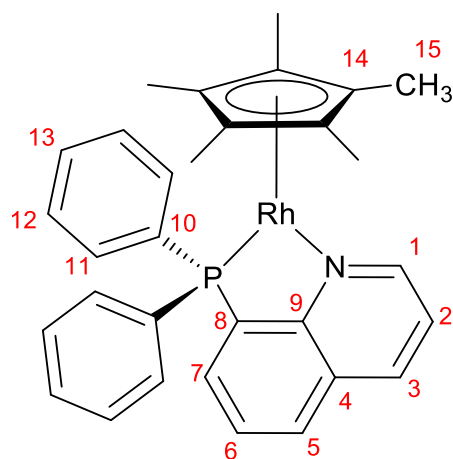

**Figure S2.** Numbering scheme for assignment of NMR data for complex **2**.

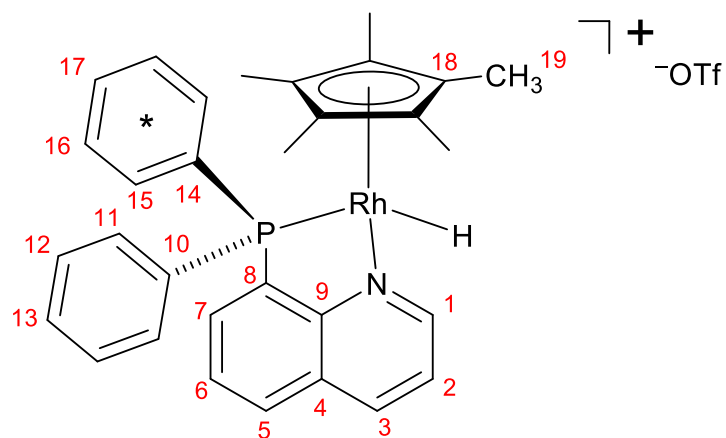

**Figure S3.** Numbering scheme for assignment of NMR data for complex **3** (\* in ring denotes phenyl group closest to Cp\* ring).

## NMR Spectra

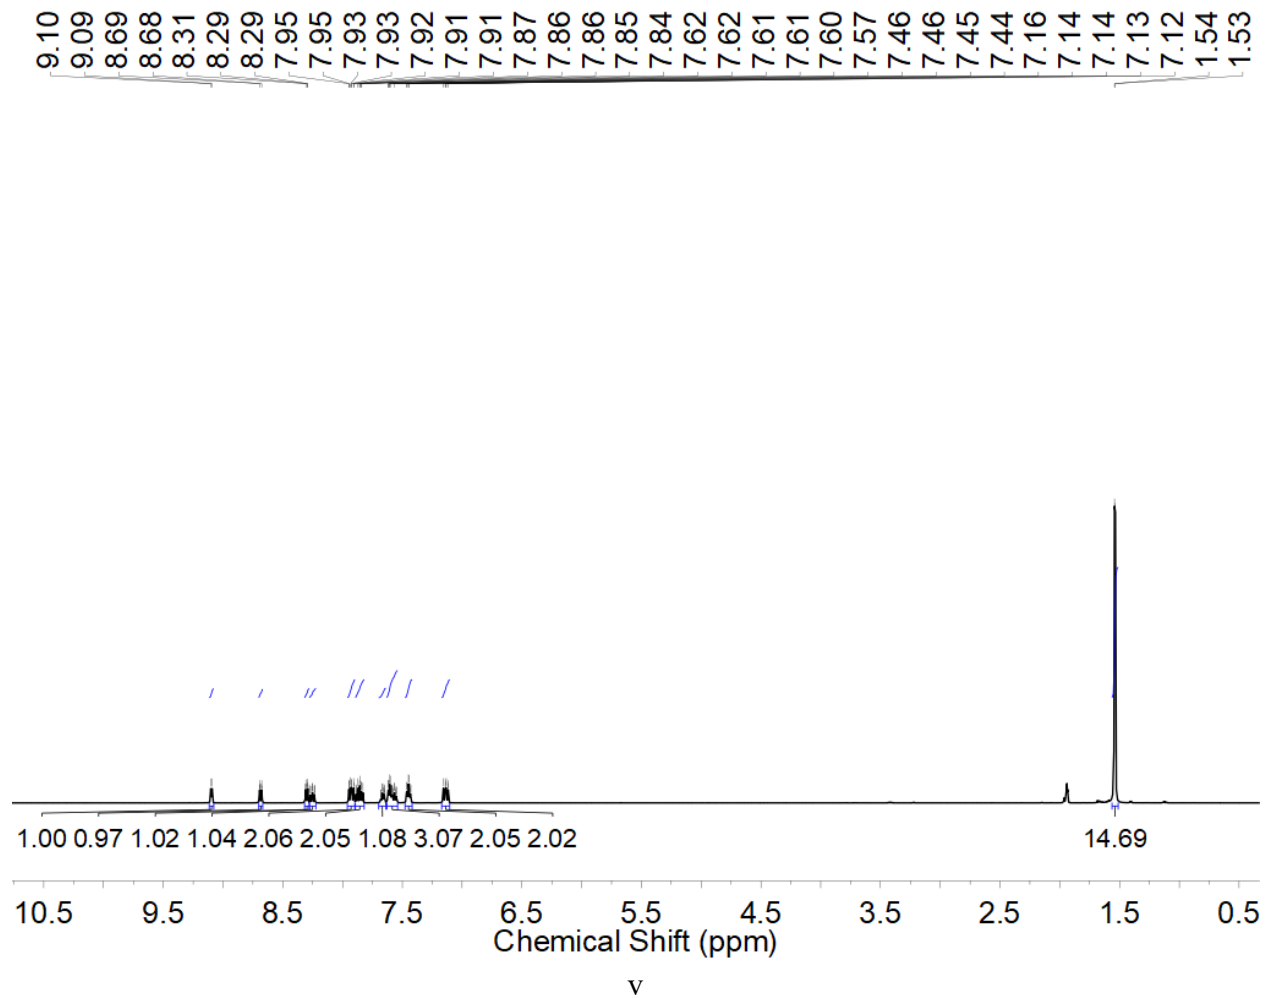

**Figure S4.**  $^1\text{H}$  NMR spectrum (500 MHz,  $\text{CD}_3\text{CN}$ ) of **1-Cl**.

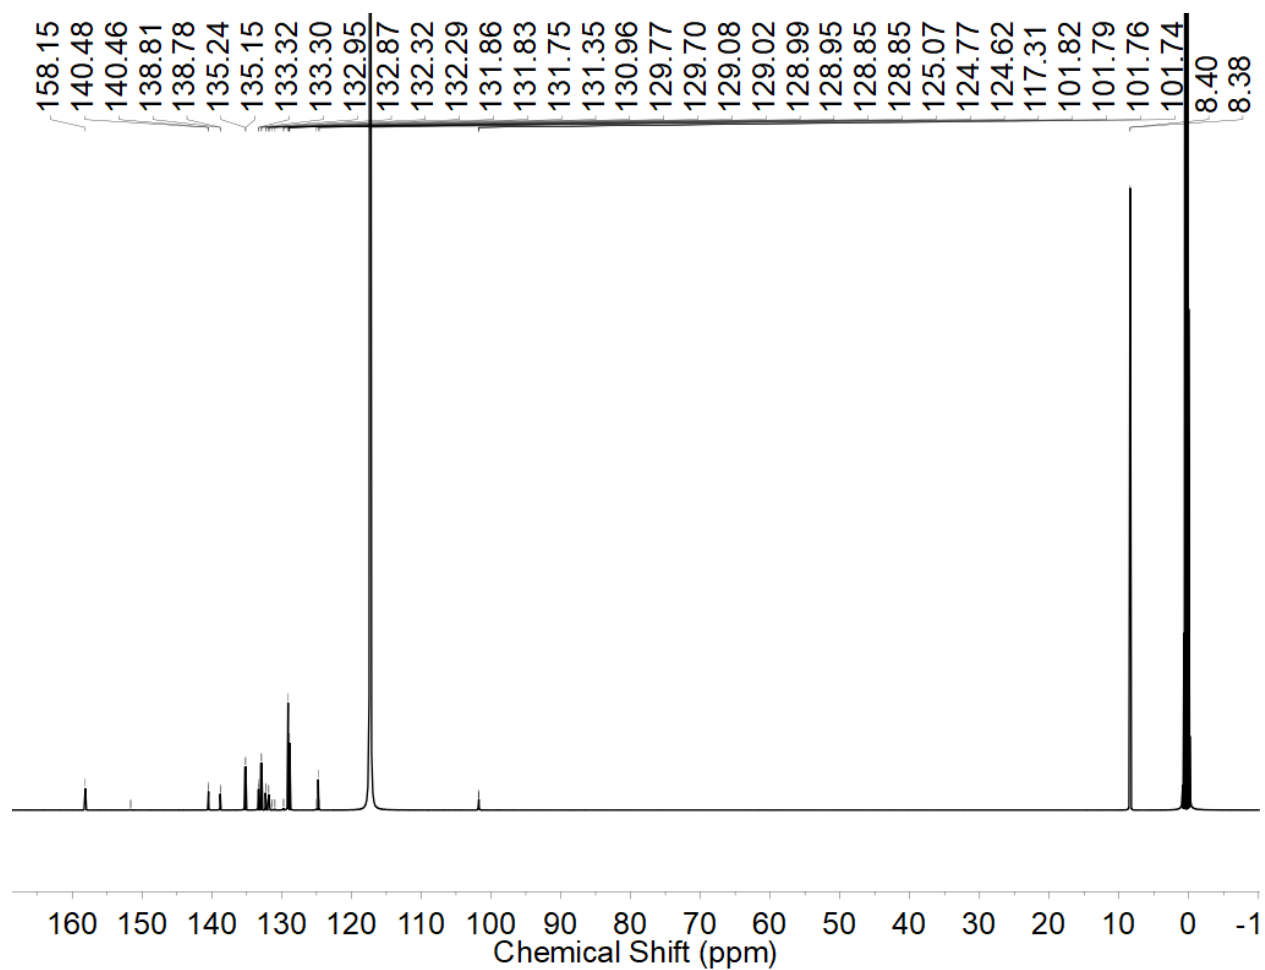

**Figure S5.**  $^{13}\text{C}\{^1\text{H}\}$  NMR spectrum (126 MHz,  $\text{CD}_3\text{CN}$ ) of **1-Cl**.

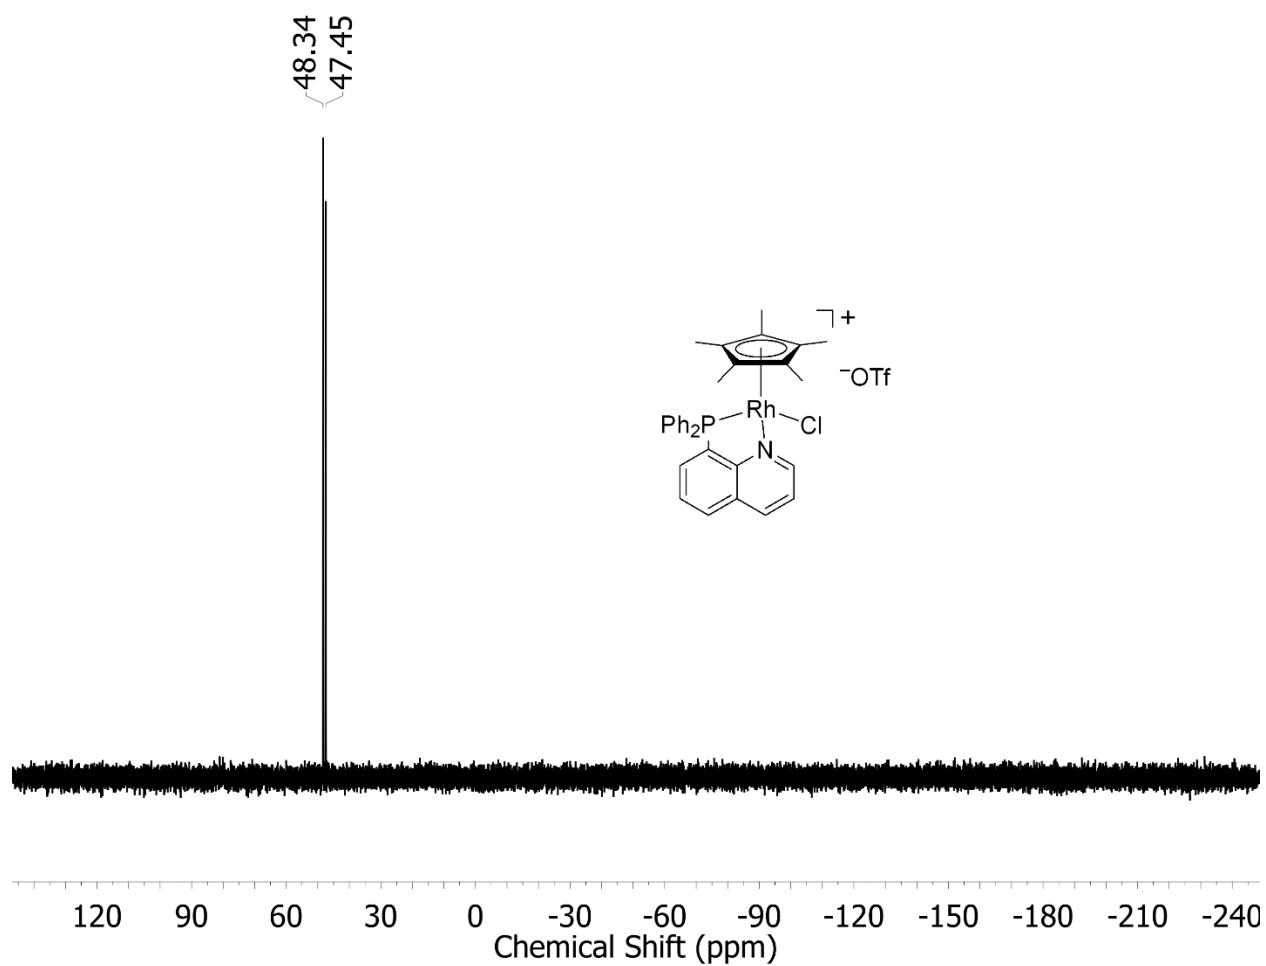

**Figure S6.**  $^{31}\text{P}\{^1\text{H}\}$  NMR spectrum (162 MHz,  $\text{CD}_3\text{CN}$ ) of **1-Cl**.

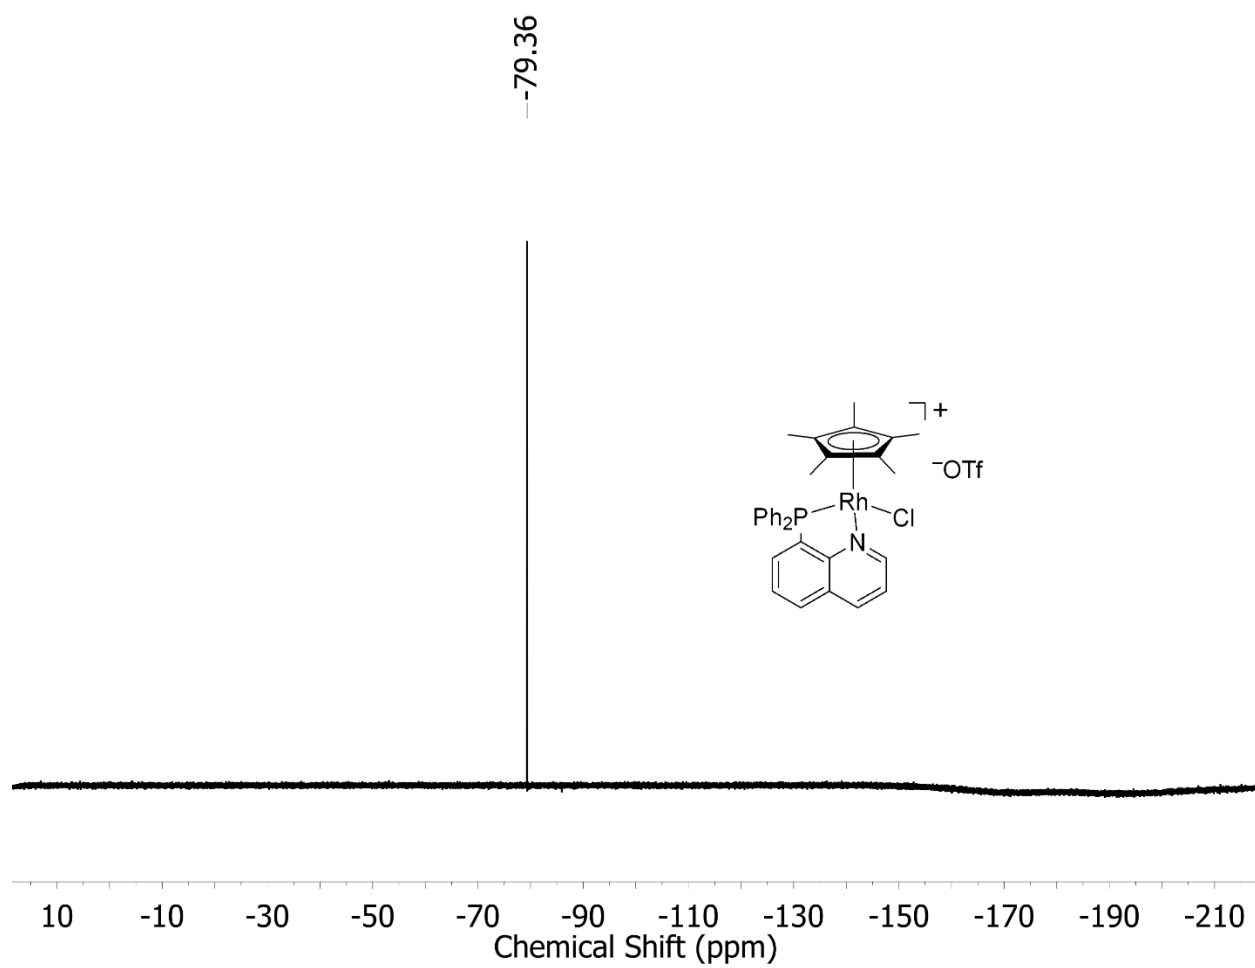

**Figure S7.**  $^{19}\text{F}$  NMR spectrum (376 MHz,  $\text{CD}_3\text{CN}$ ) of **1-Cl**.



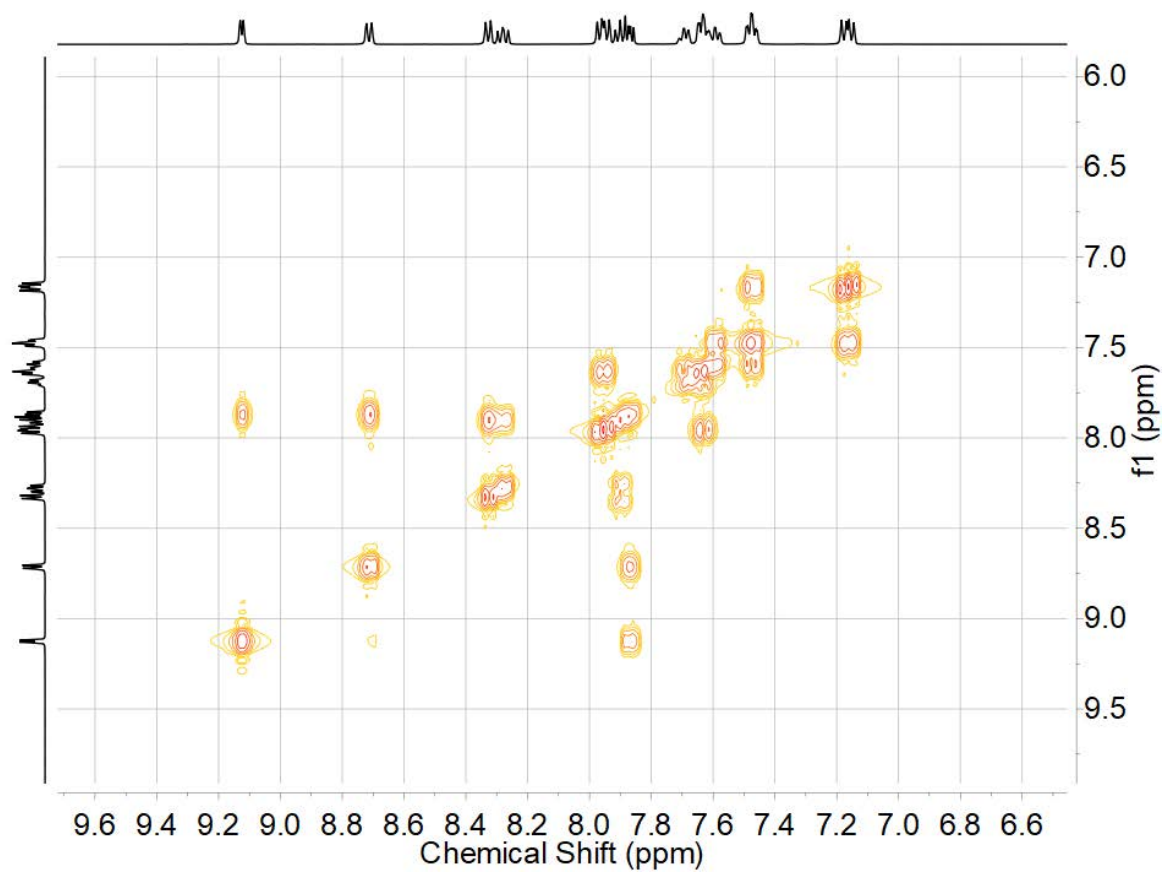

**Figure S8.** COSY NMR spectrum ( $\text{CD}_3\text{CN}$ ) of **1-Cl**.

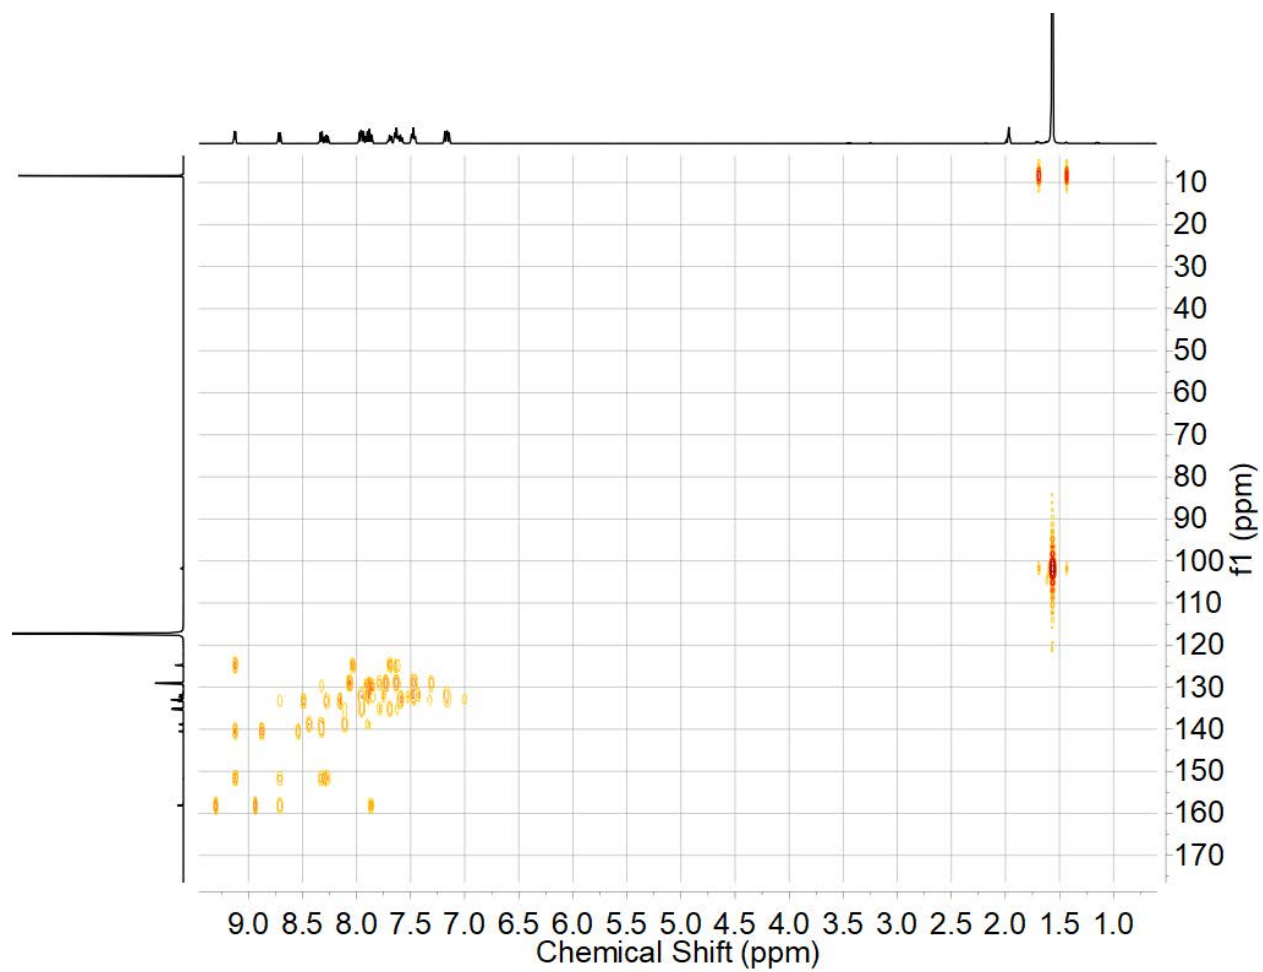

**Figure S9.** HMBC NMR spectrum (CD<sub>3</sub>CN) of **1-Cl**.

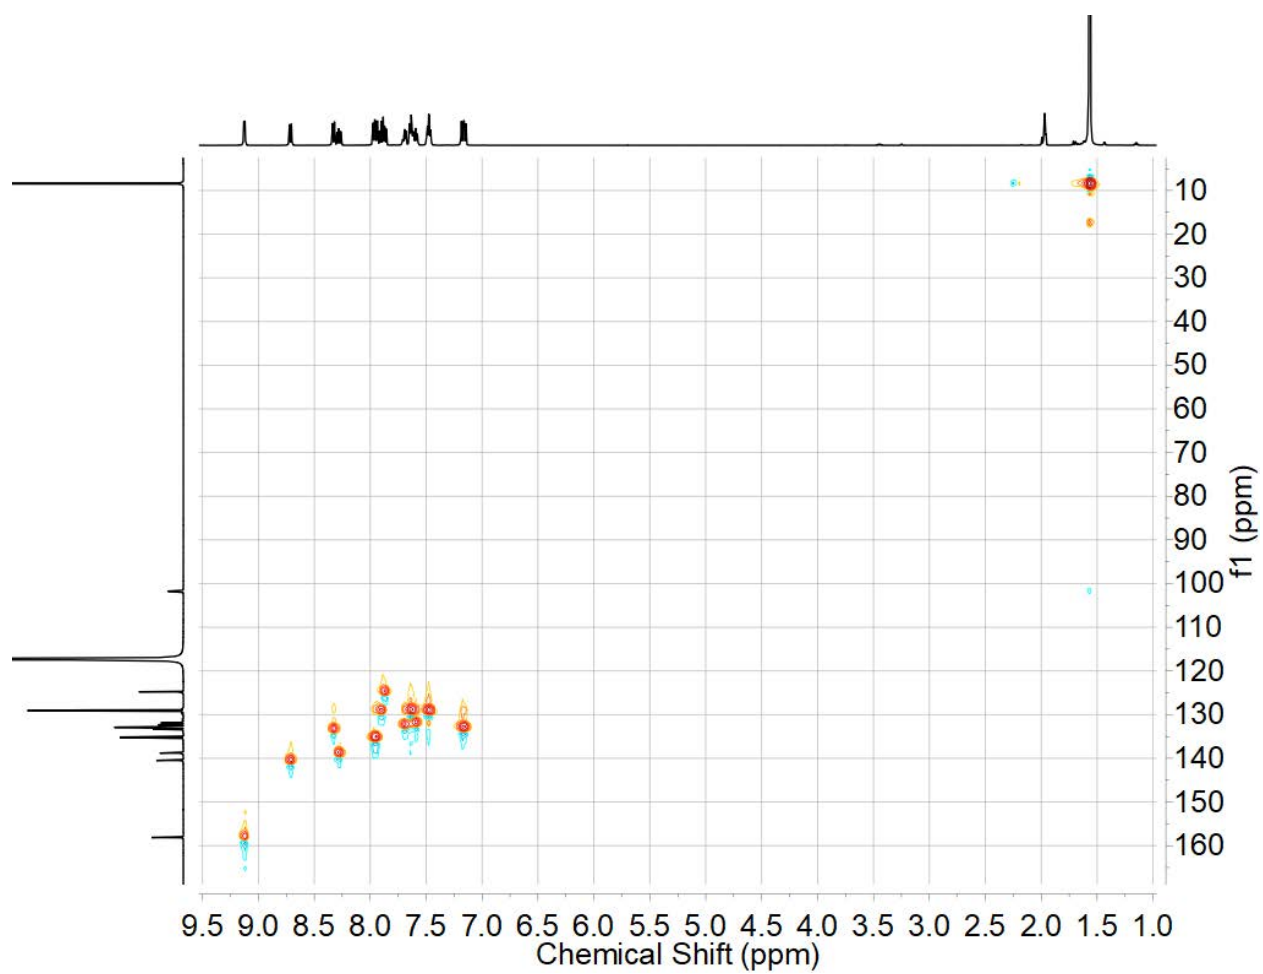

**Figure S10.** HSQC NMR spectrum (CD<sub>3</sub>CN) of **1-Cl**.

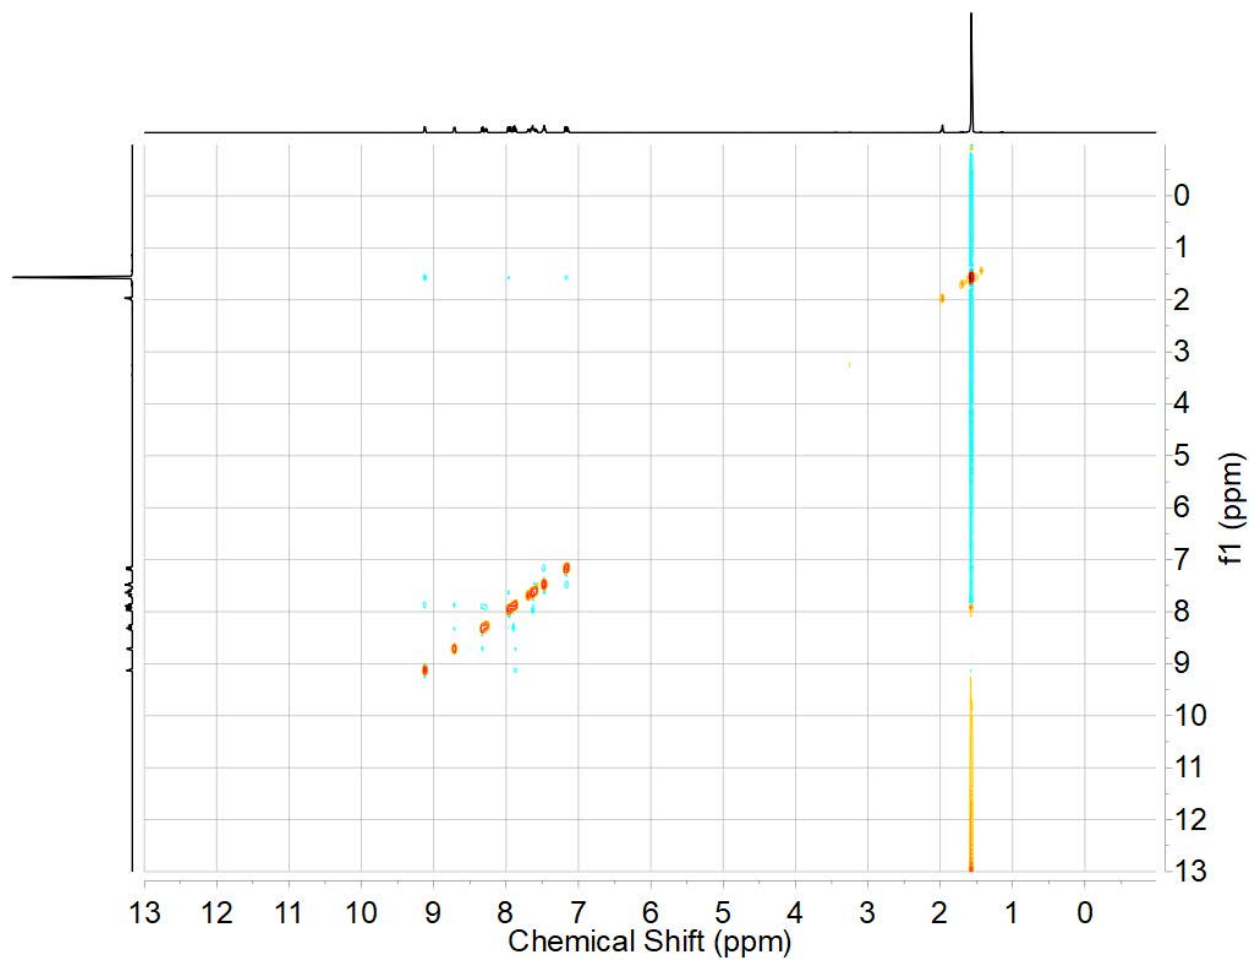

**Figure S11.** NOESY NMR spectrum (CD<sub>3</sub>CN) of **1-Cl**.

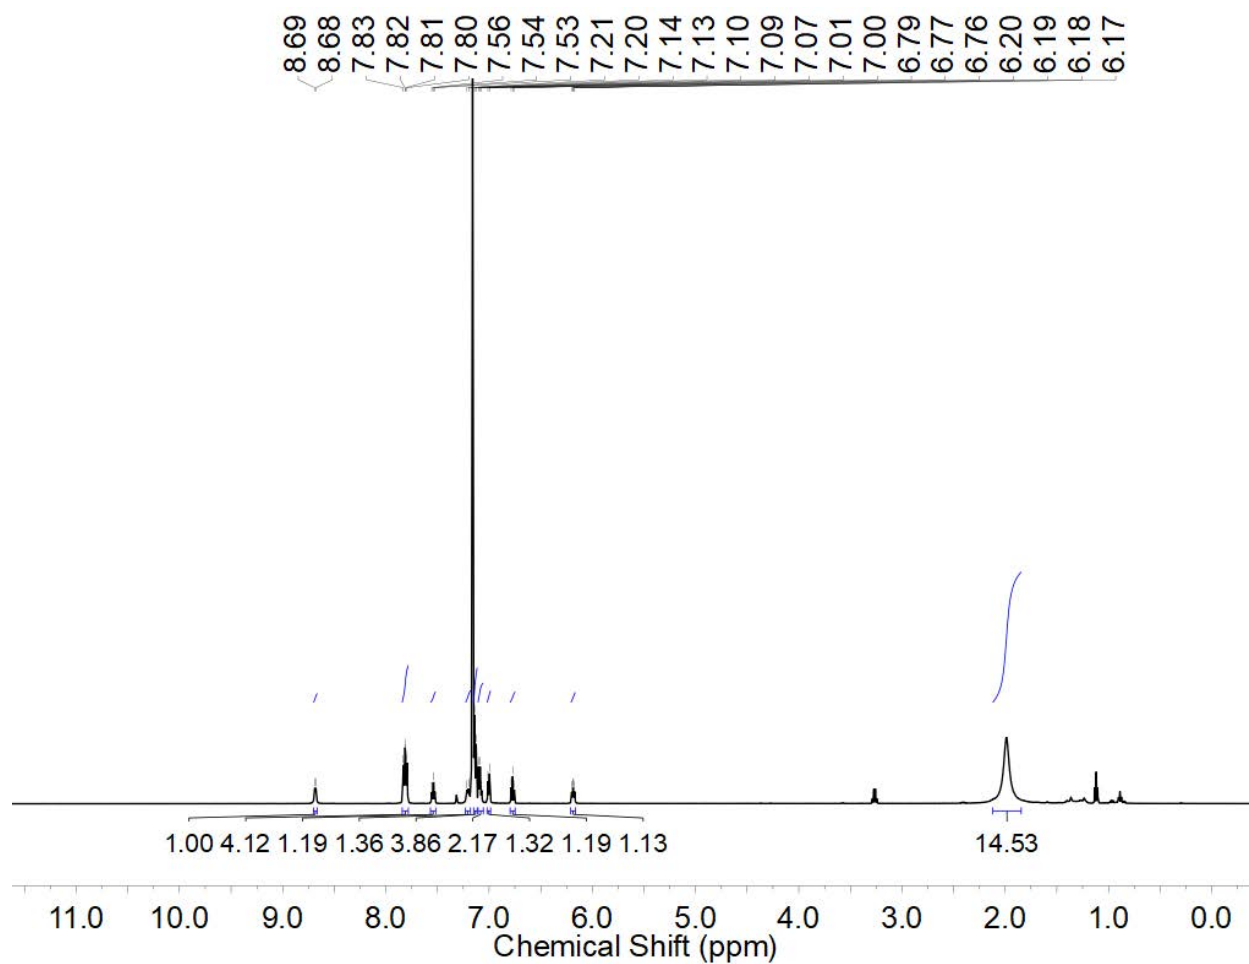

**Figure S12.** <sup>1</sup>H NMR spectrum (500 MHz, C<sub>6</sub>D<sub>6</sub>) of **2**.

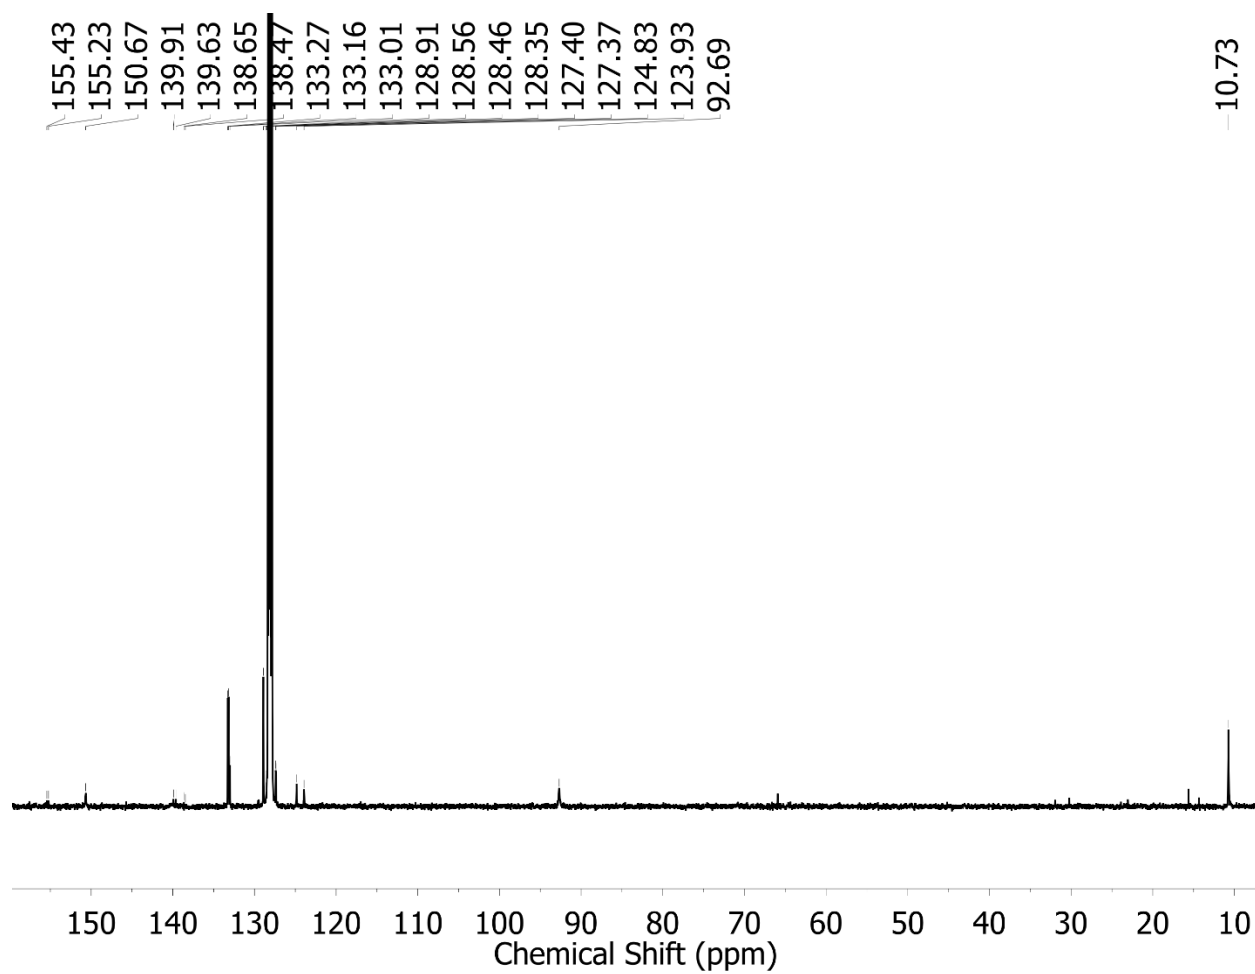

**Figure S13.**  $^{13}\text{C}\{^1\text{H}\}$  NMR spectrum (126 MHz,  $\text{C}_6\text{D}_6$ ) of **2**.

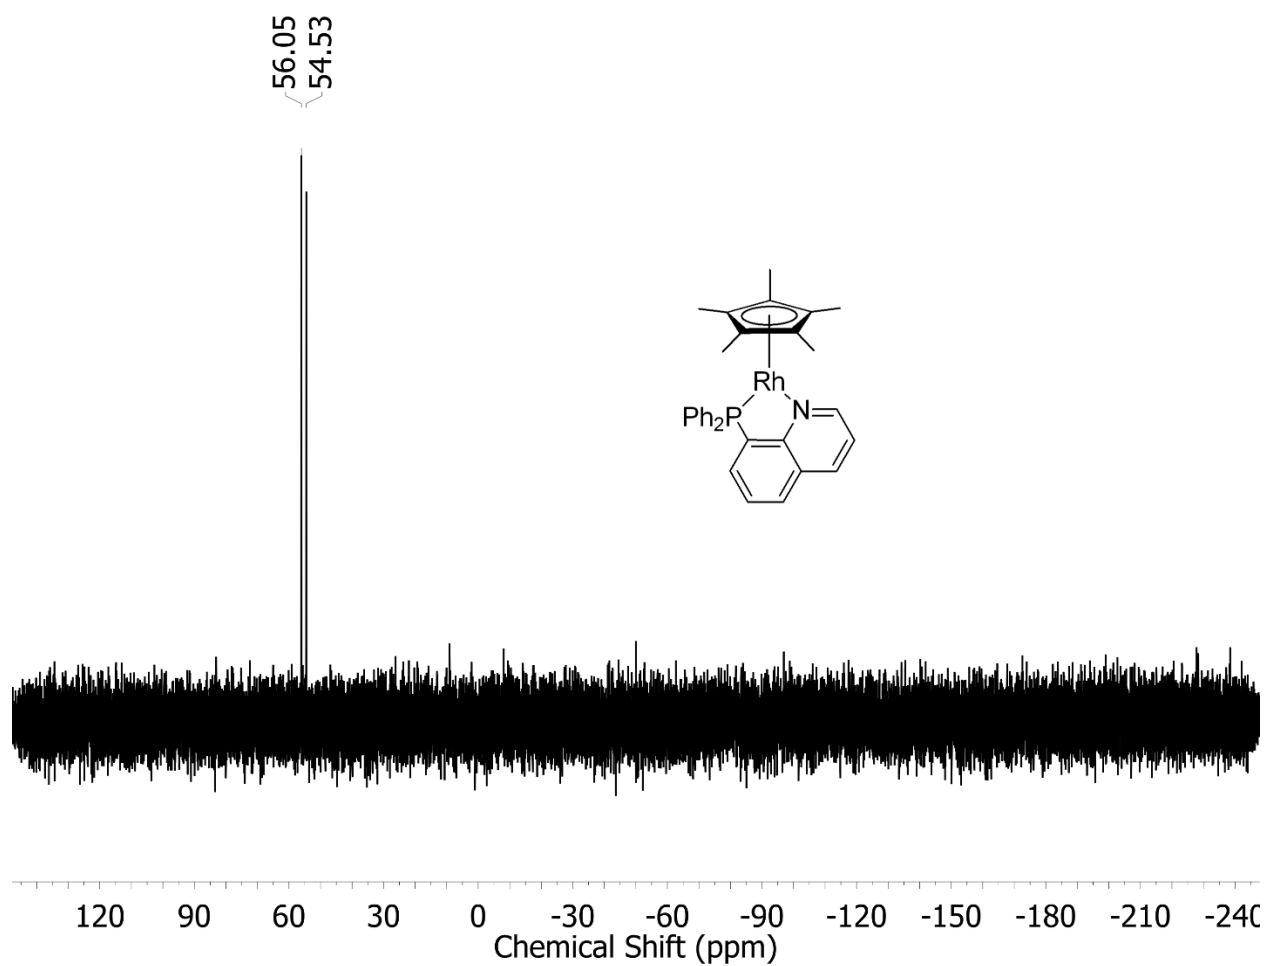

**Figure S14.**  $^{31}\text{P}\{^1\text{H}\}$  NMR spectrum (162 MHz,  $\text{C}_6\text{D}_6$ ) of **2**.

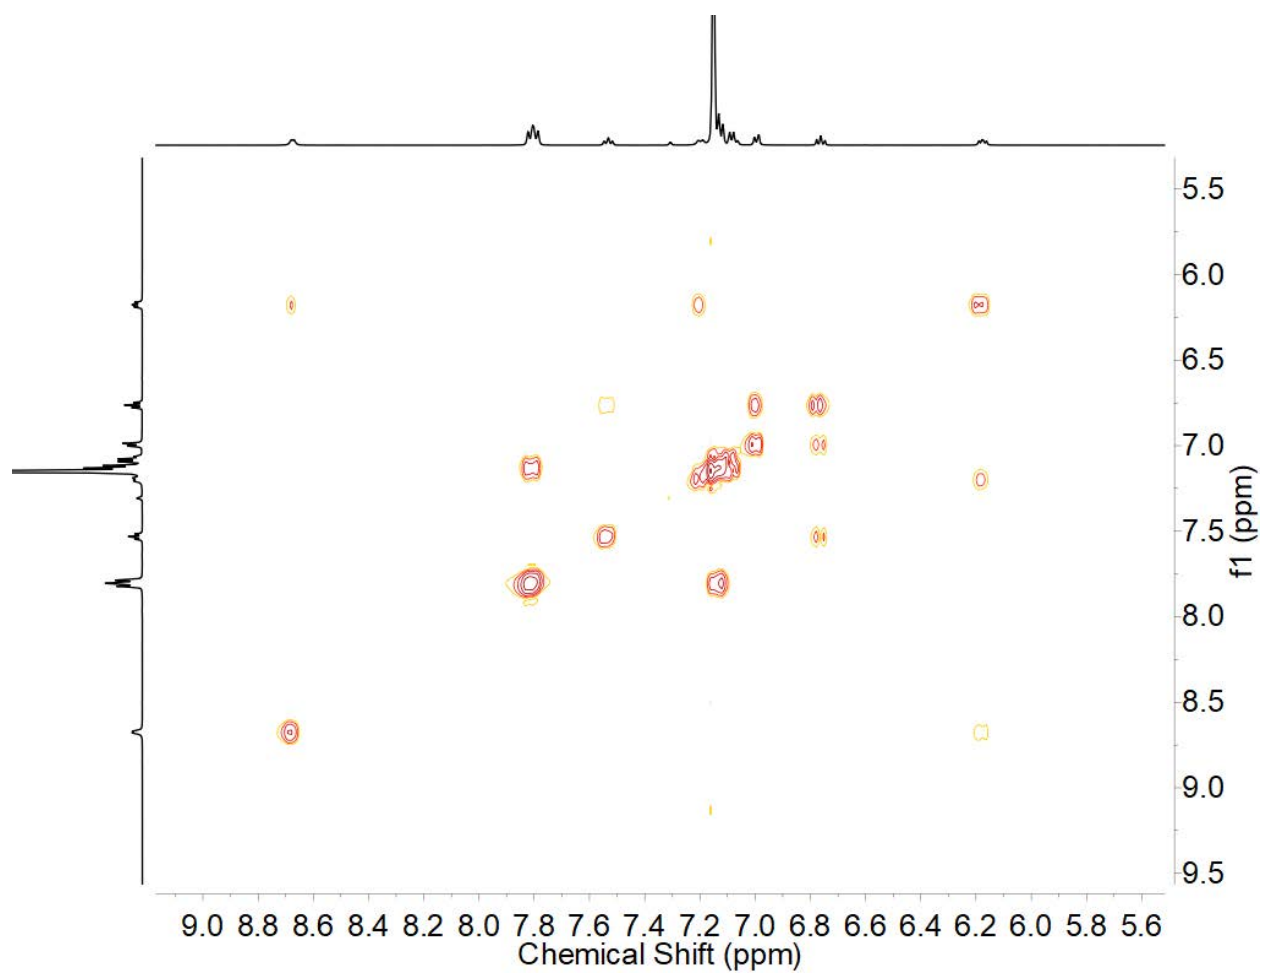

**Figure S15.** COSY NMR spectrum ( $\text{C}_6\text{D}_6$ ) of **2**.



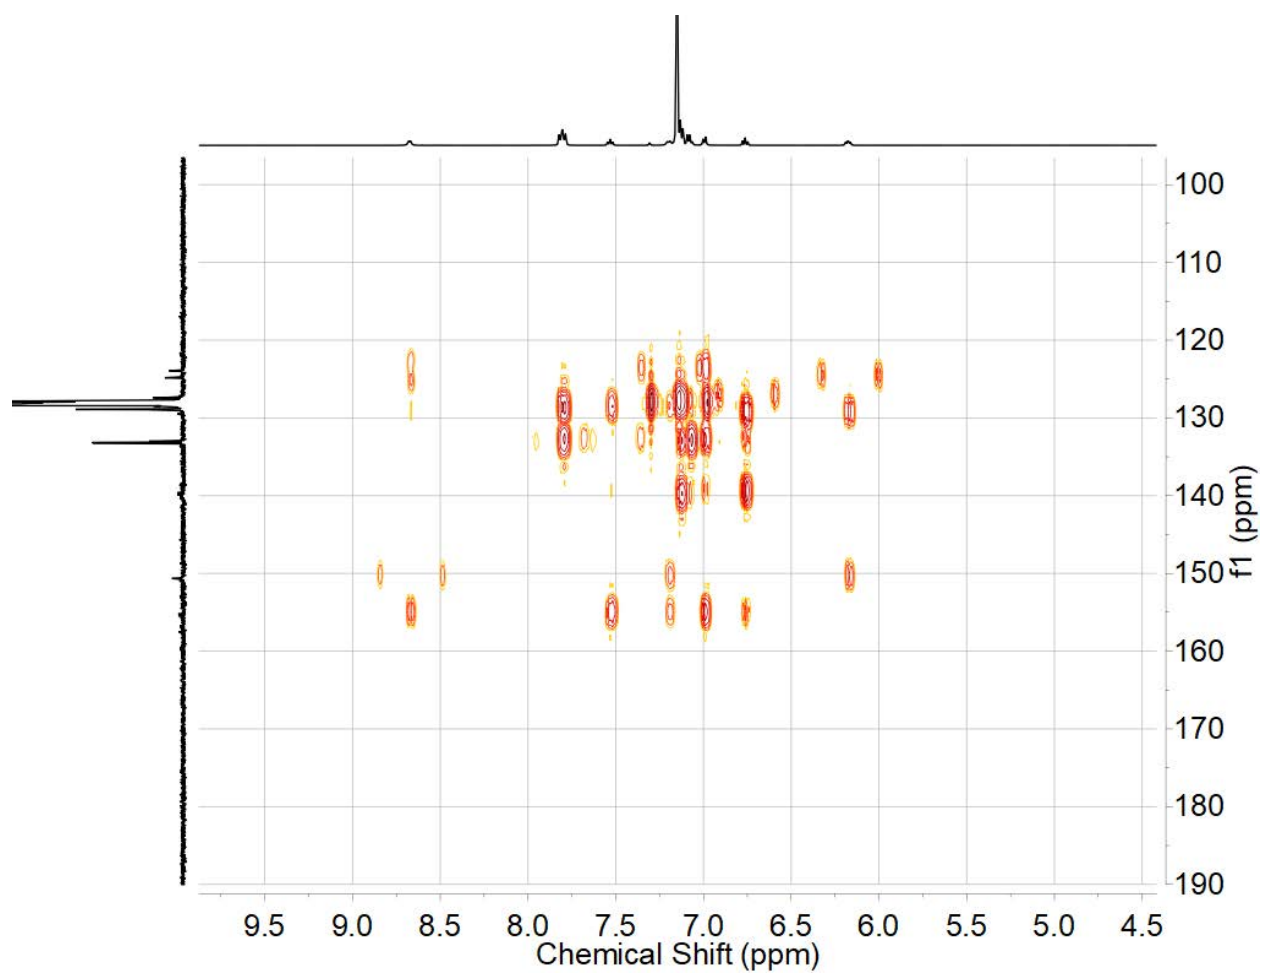

**Figure S16.** HMBC NMR spectrum ( $C_6D_6$ ) of **2**.

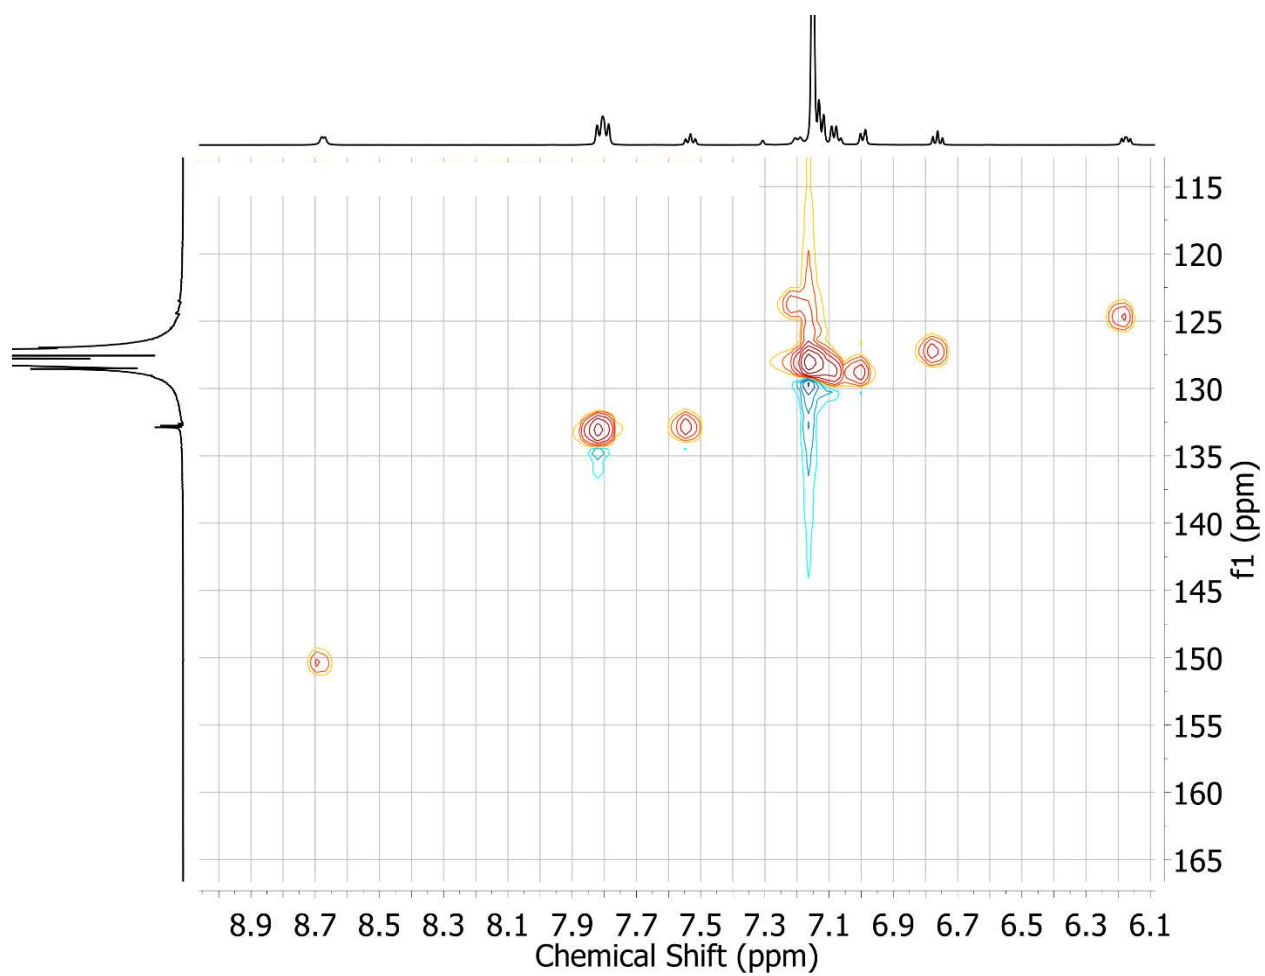

**Figure S17.** HSQC NMR spectrum (C<sub>6</sub>D<sub>6</sub>) of **2**.

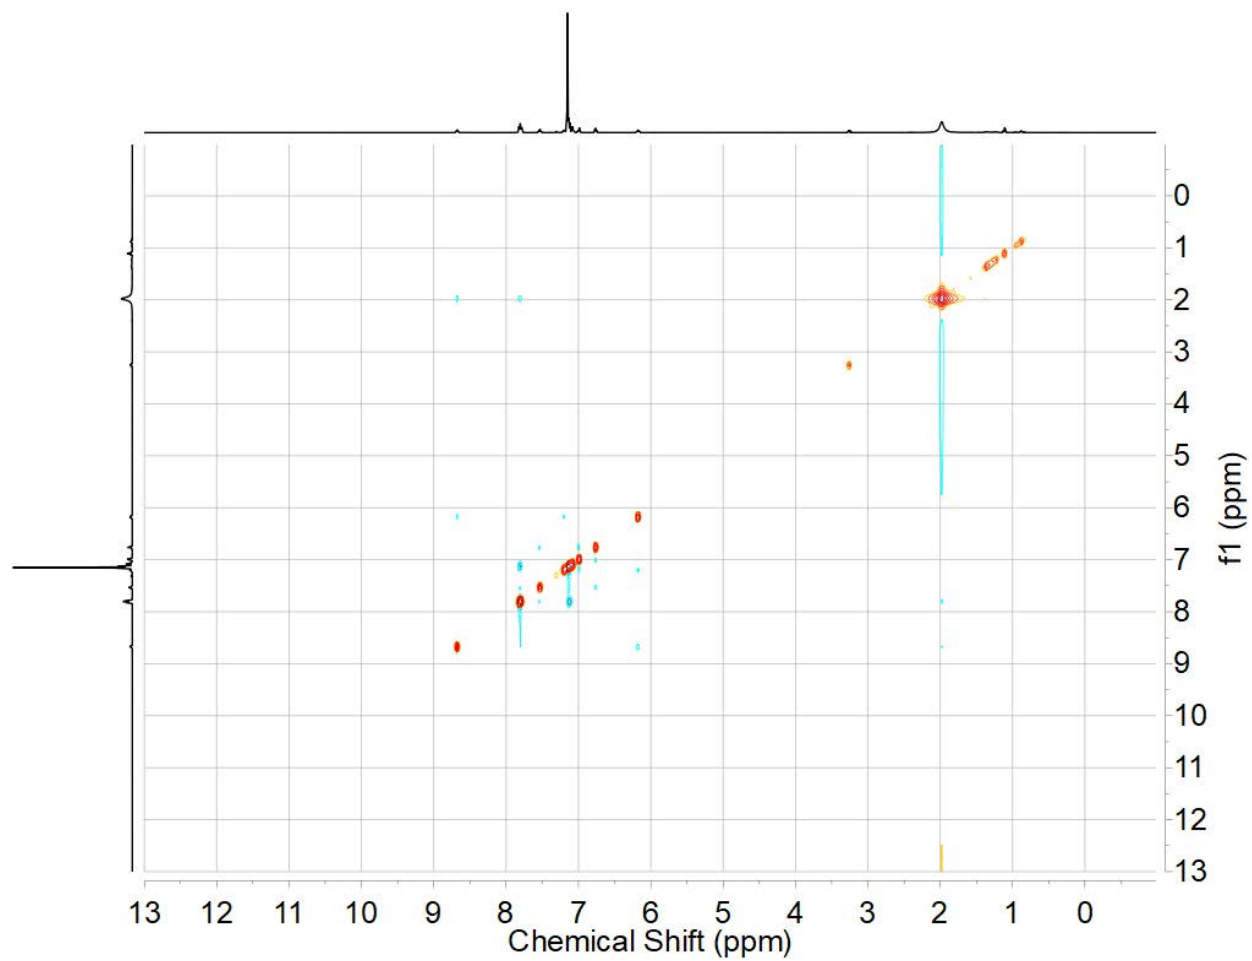

**Figure S18.** NOESY NMR spectrum ( $\text{C}_6\text{D}_6$ ) of **2**.

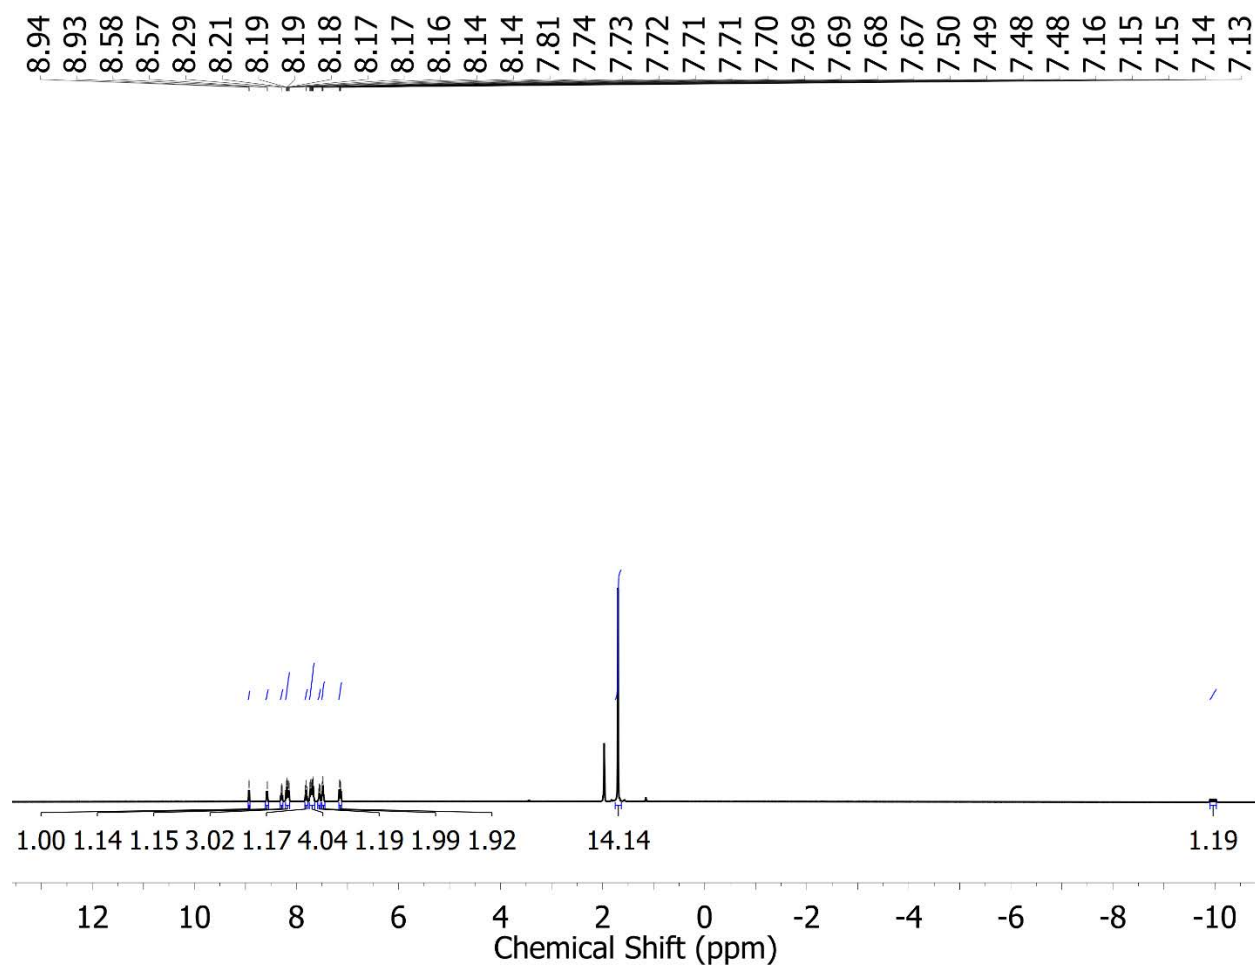

**Figure S19.** <sup>1</sup>H NMR spectrum (400 MHz, CD<sub>3</sub>CN) of **3**.

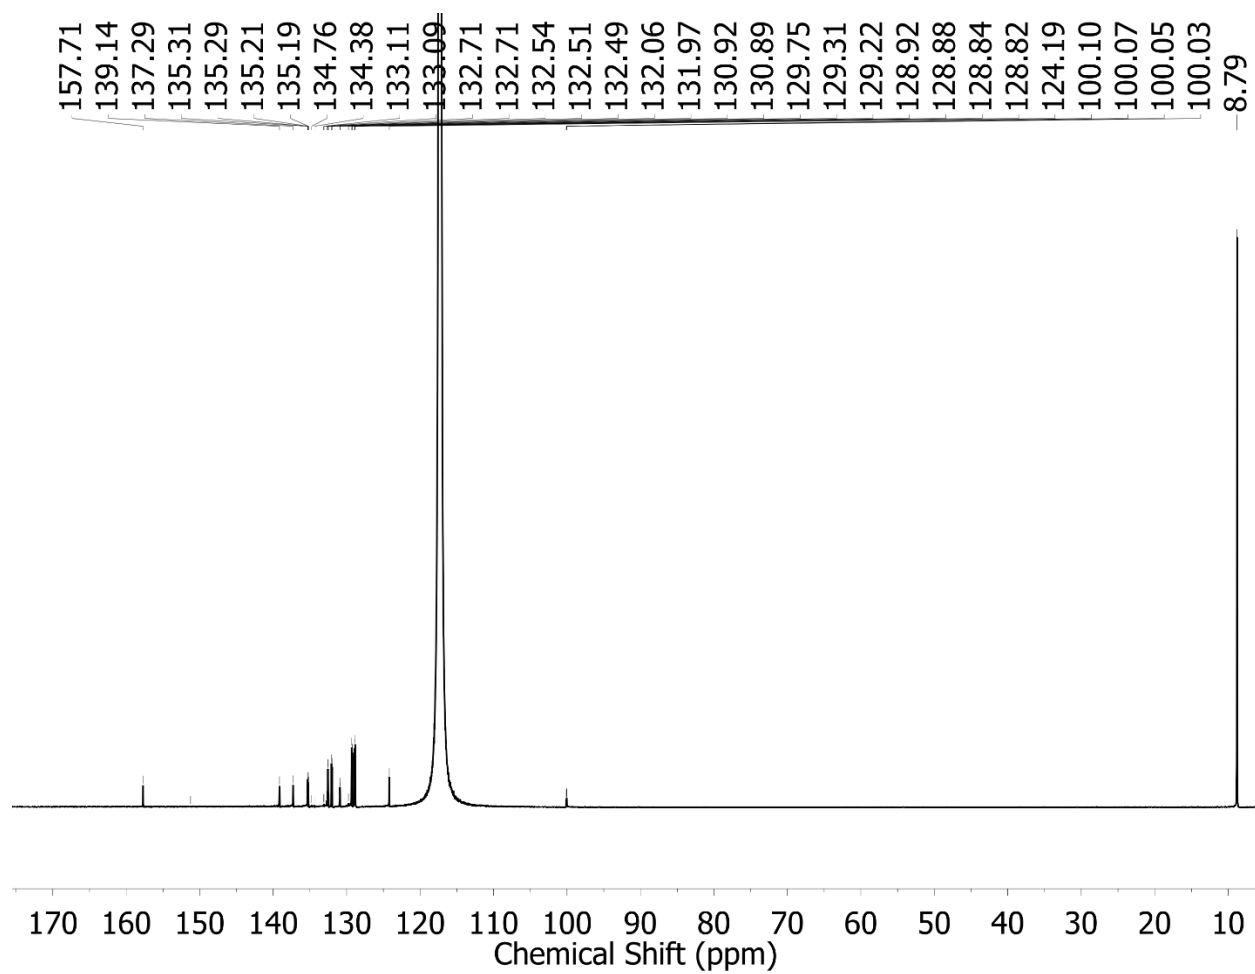

**Figure S20.**  $^{13}\text{C}\{^1\text{H}\}$  NMR spectrum (126 MHz,  $\text{CD}_3\text{CN}$ ) of **3**.

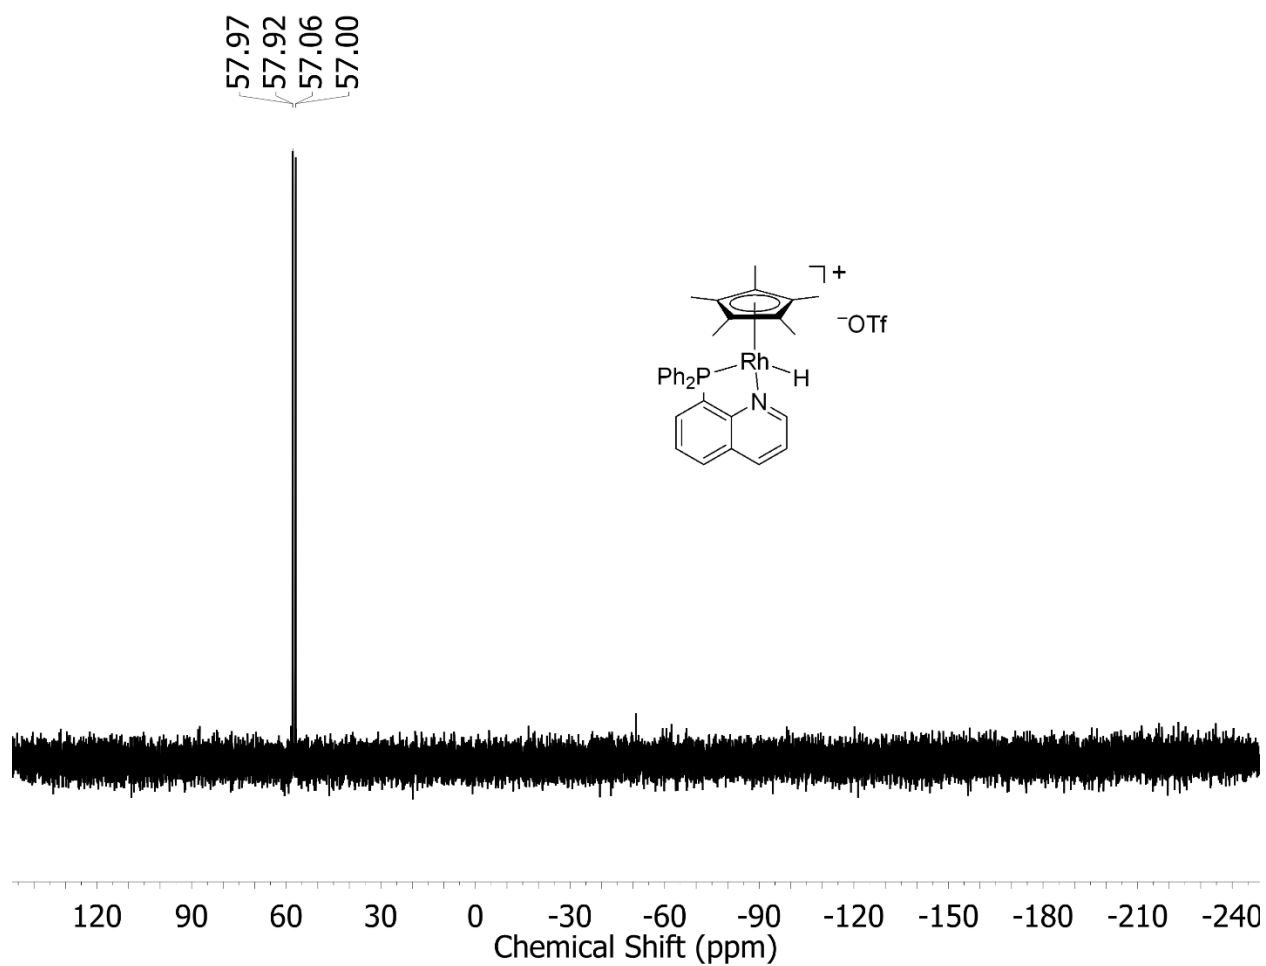

**Figure S21.**  $^{31}\text{P}\{^1\text{H}\}$  NMR spectrum (162 MHz,  $\text{CD}_3\text{CN}$ ) of **3**.

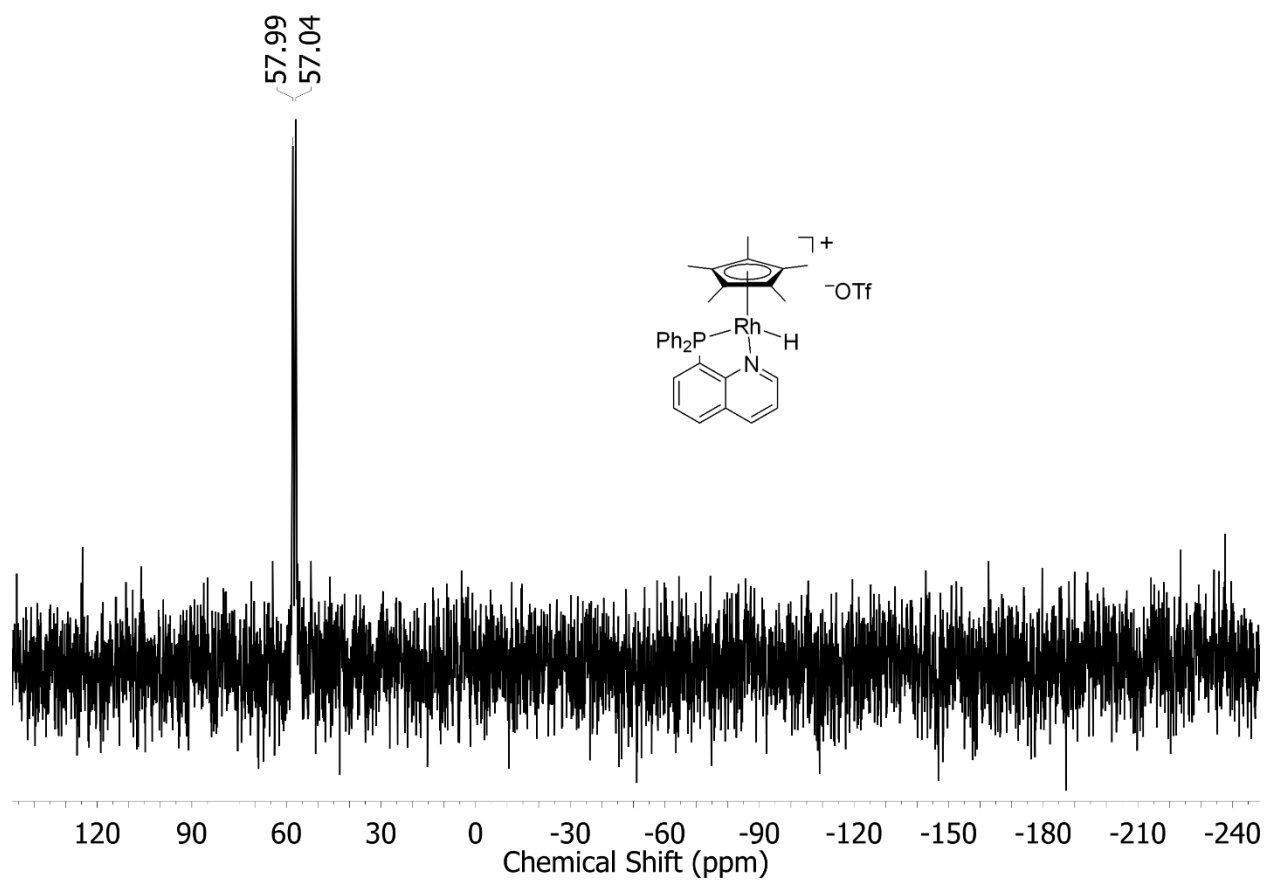

**Figure S22.**  $^{31}\text{P}$  NMR spectrum (162 MHz,  $\text{CD}_3\text{CN}$ ) of **3**.  $^2J_{\text{P,H}}$  is not observed, while  $^1J_{\text{P,Rh}}$  of 158 Hz is observed.

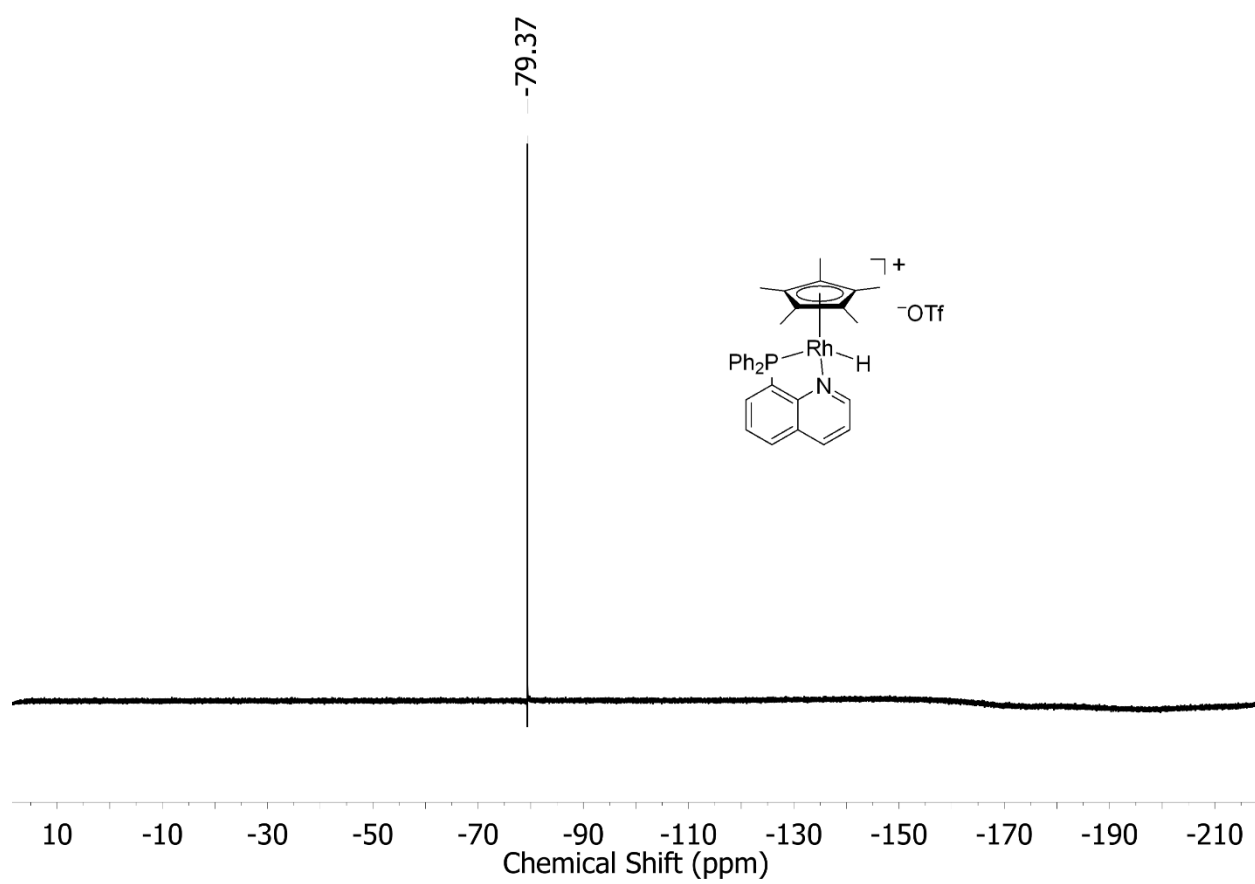

**Figure S23.**  $^{19}\text{F}$  NMR spectrum (376 MHz,  $\text{CD}_3\text{CN}$ ) of **3**.



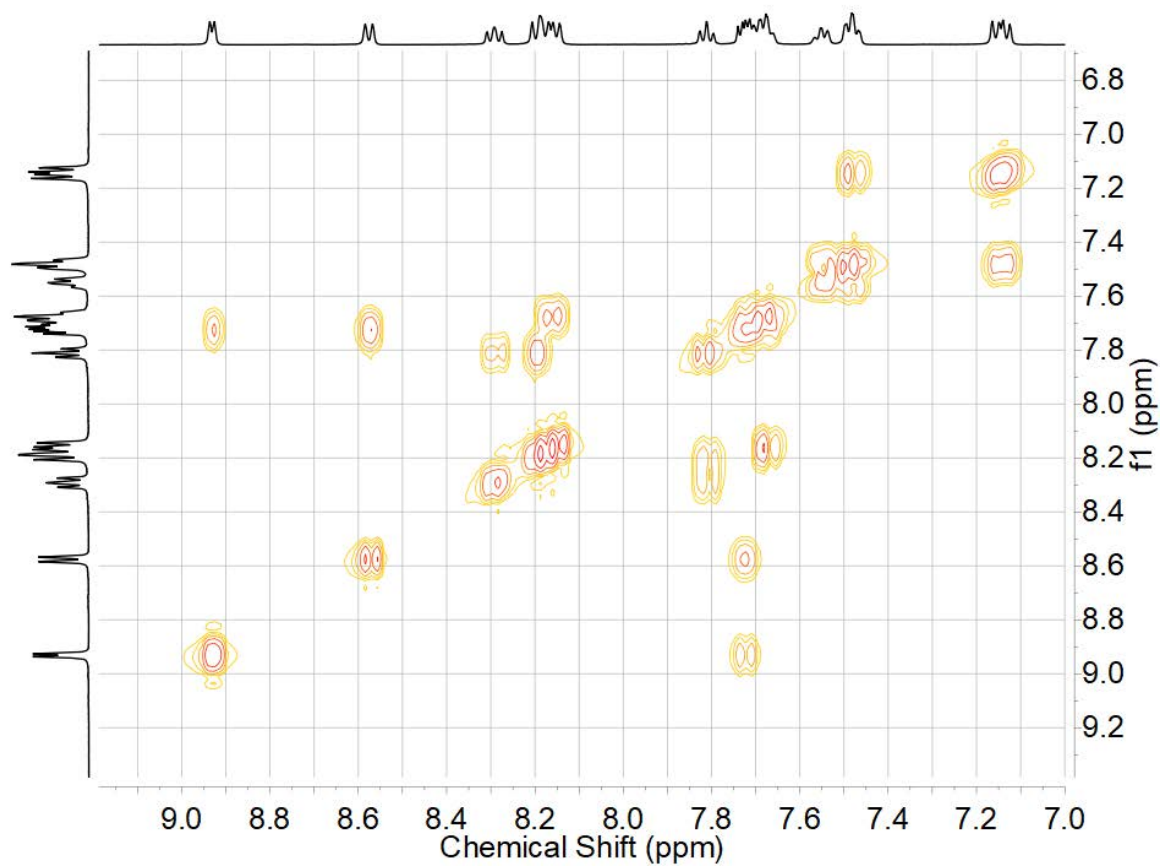

**Figure S24.** COSY NMR spectrum ( $\text{CD}_3\text{CN}$ ) of **3**.

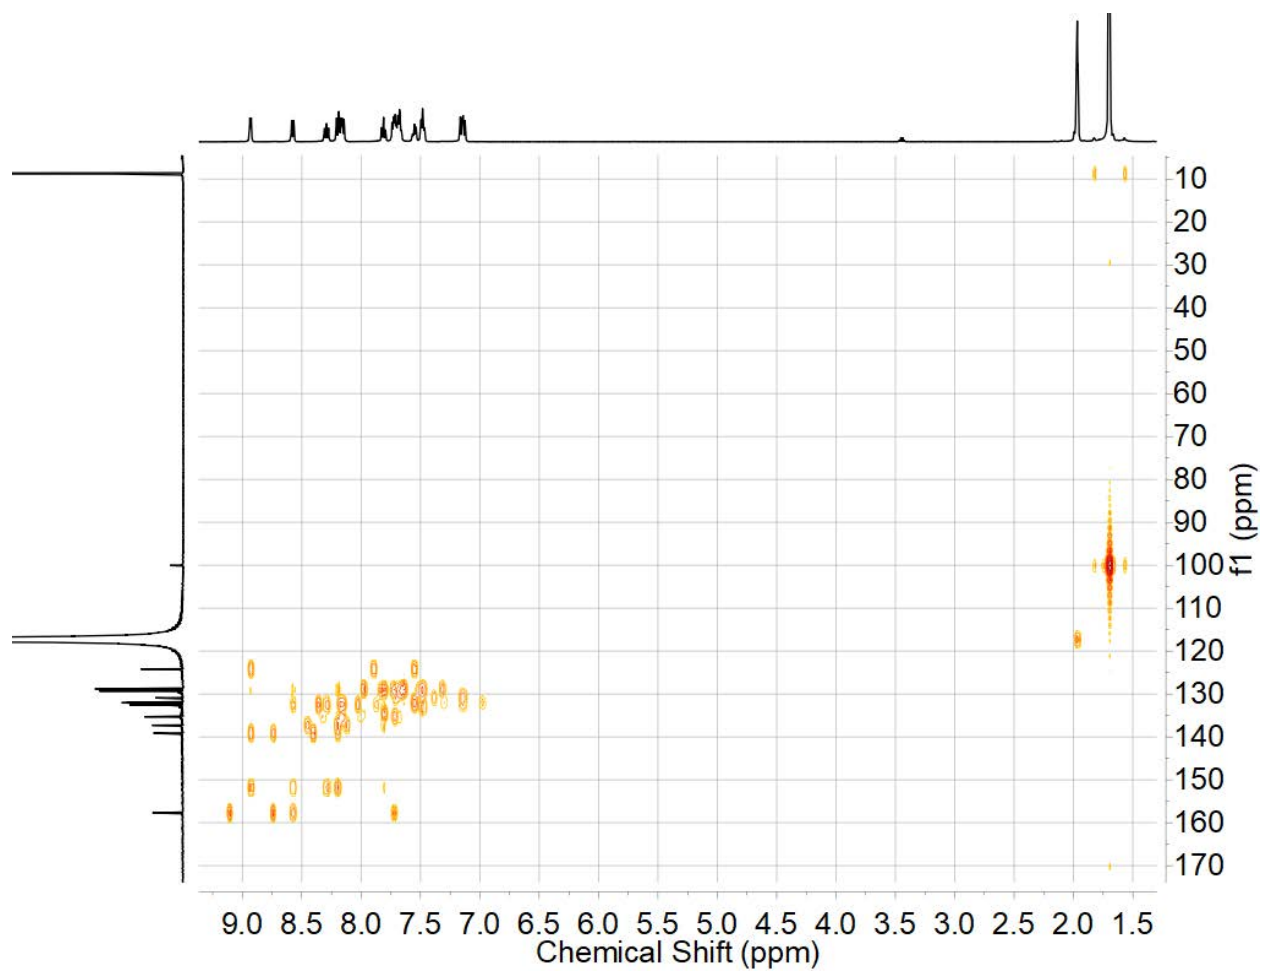

**Figure S25.** HMBC NMR spectrum (CD<sub>3</sub>CN) of **3**.

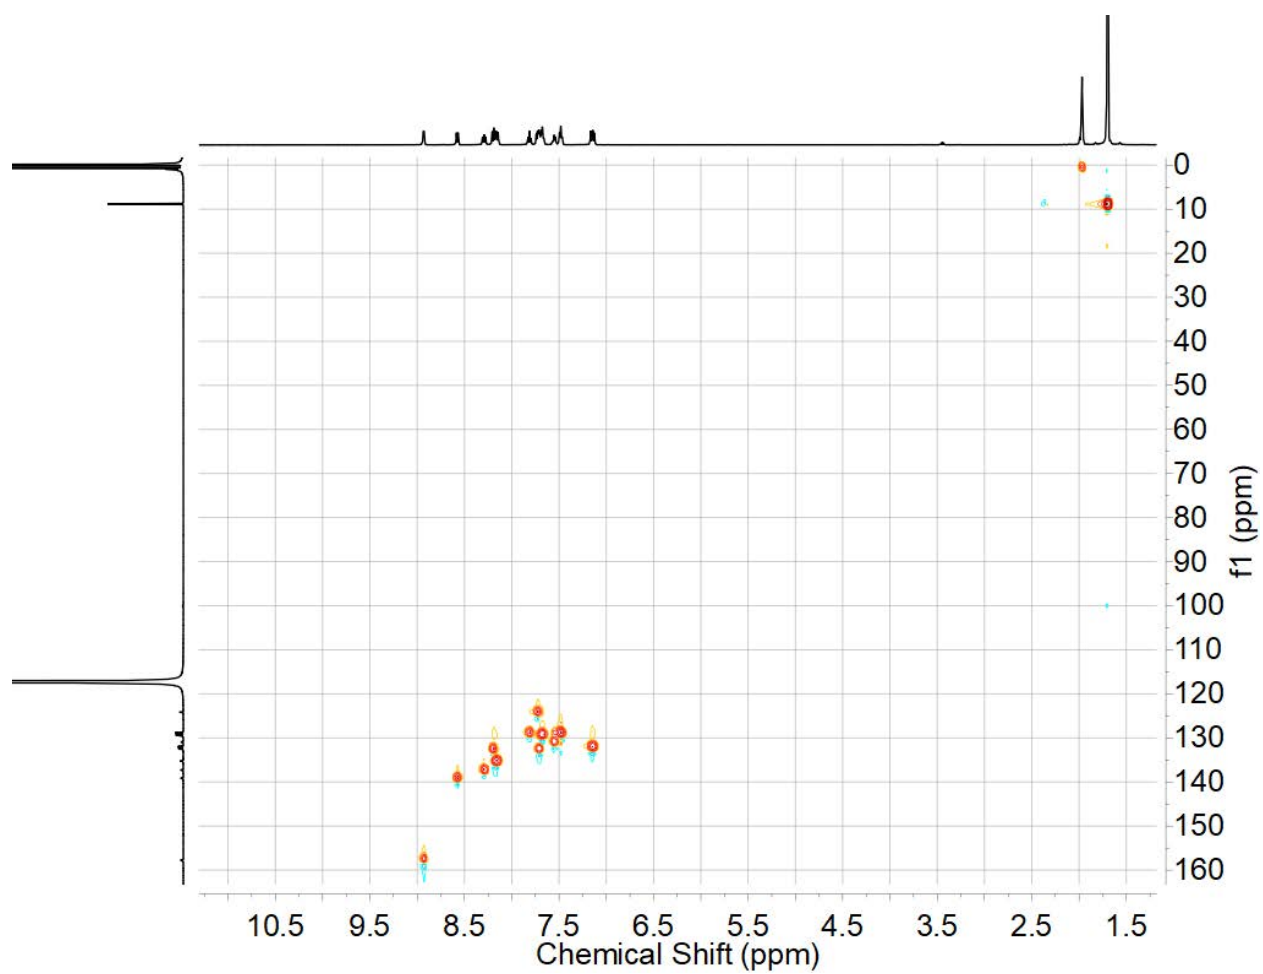

**Figure S26.** HSQC NMR spectrum (CD<sub>3</sub>CN) of **3**.

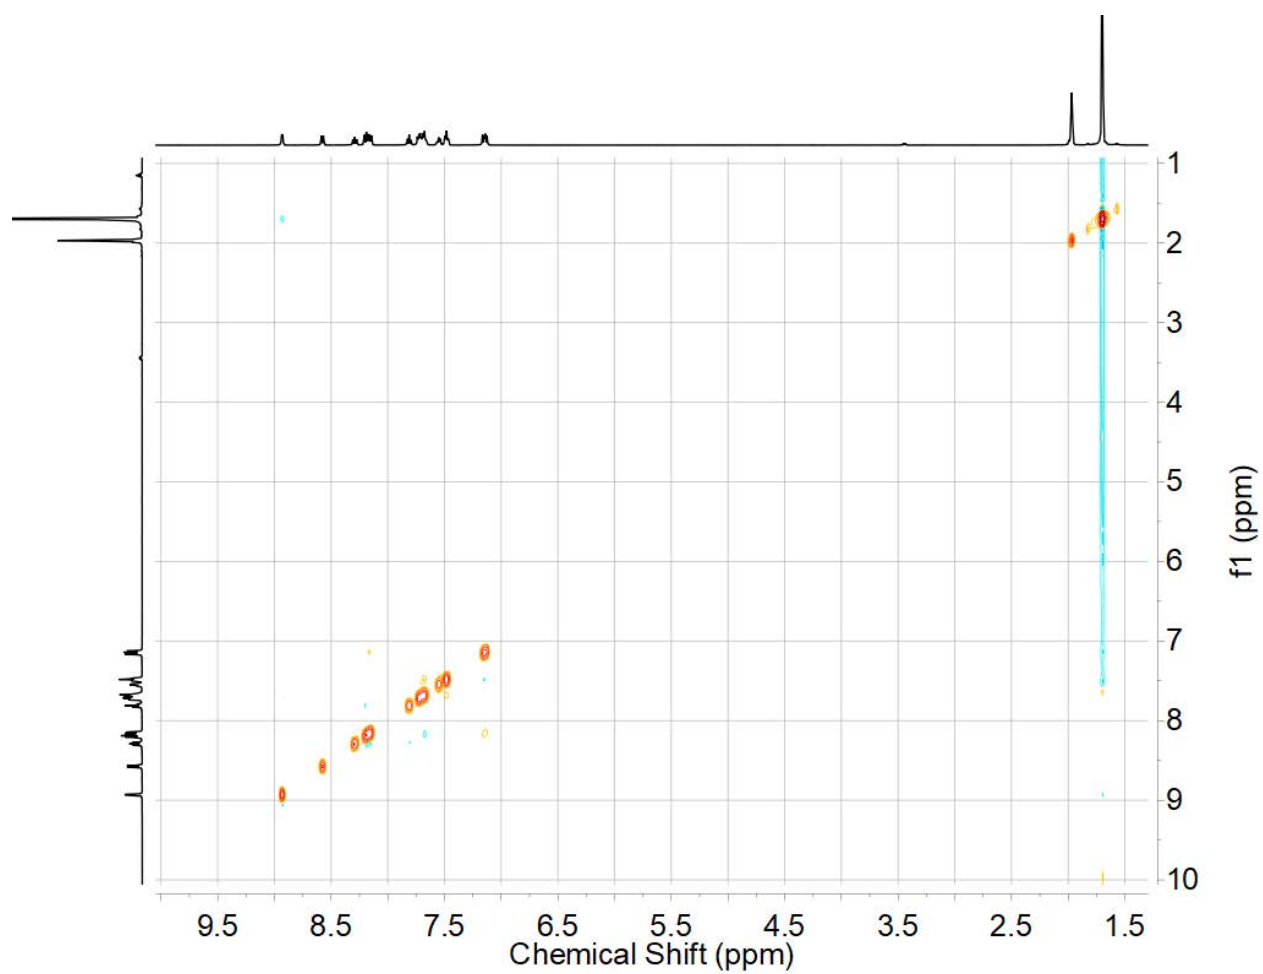

**Figure S27.** NOESY NMR spectrum (CD<sub>3</sub>CN) of **3**.

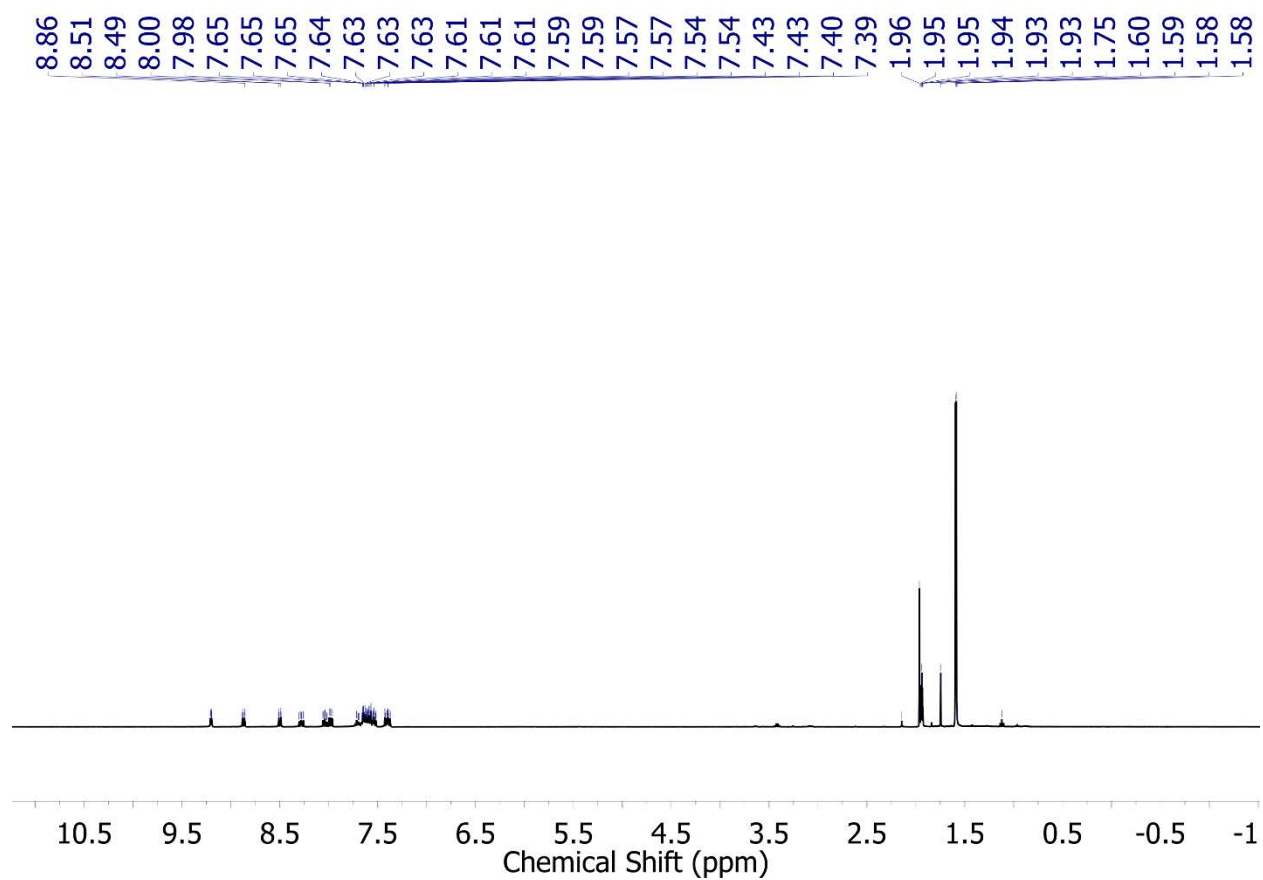

**Figure S28.**  $^1\text{H}$  NMR spectrum (400 MHz,  $\text{CD}_3\text{CN}$ ) of **1-NCCH<sub>3</sub>**.

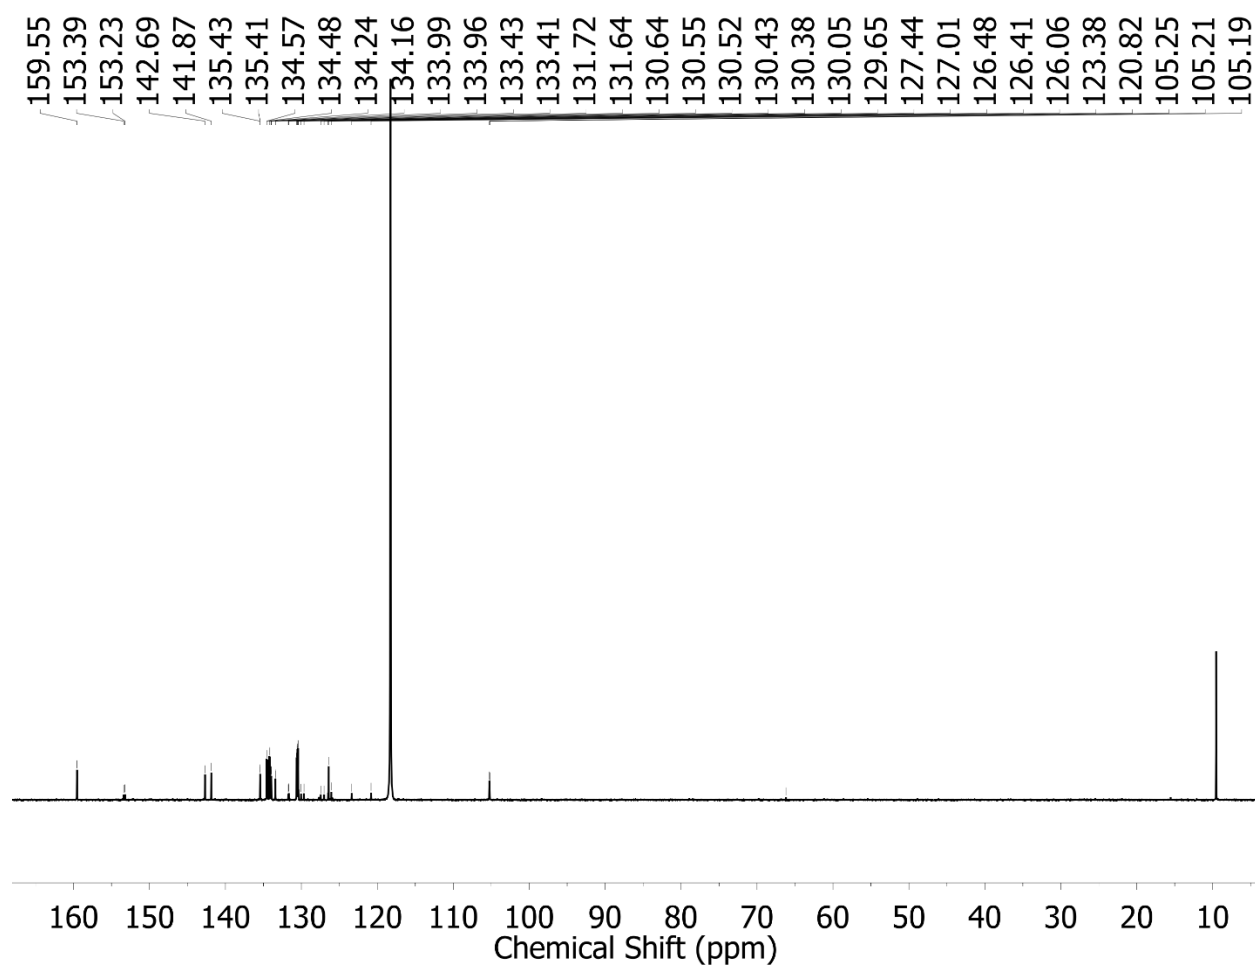

**Figure S29.** <sup>13</sup>C NMR spectrum (162 MHz, CD<sub>3</sub>CN) of 1-NCCH<sub>3</sub>.

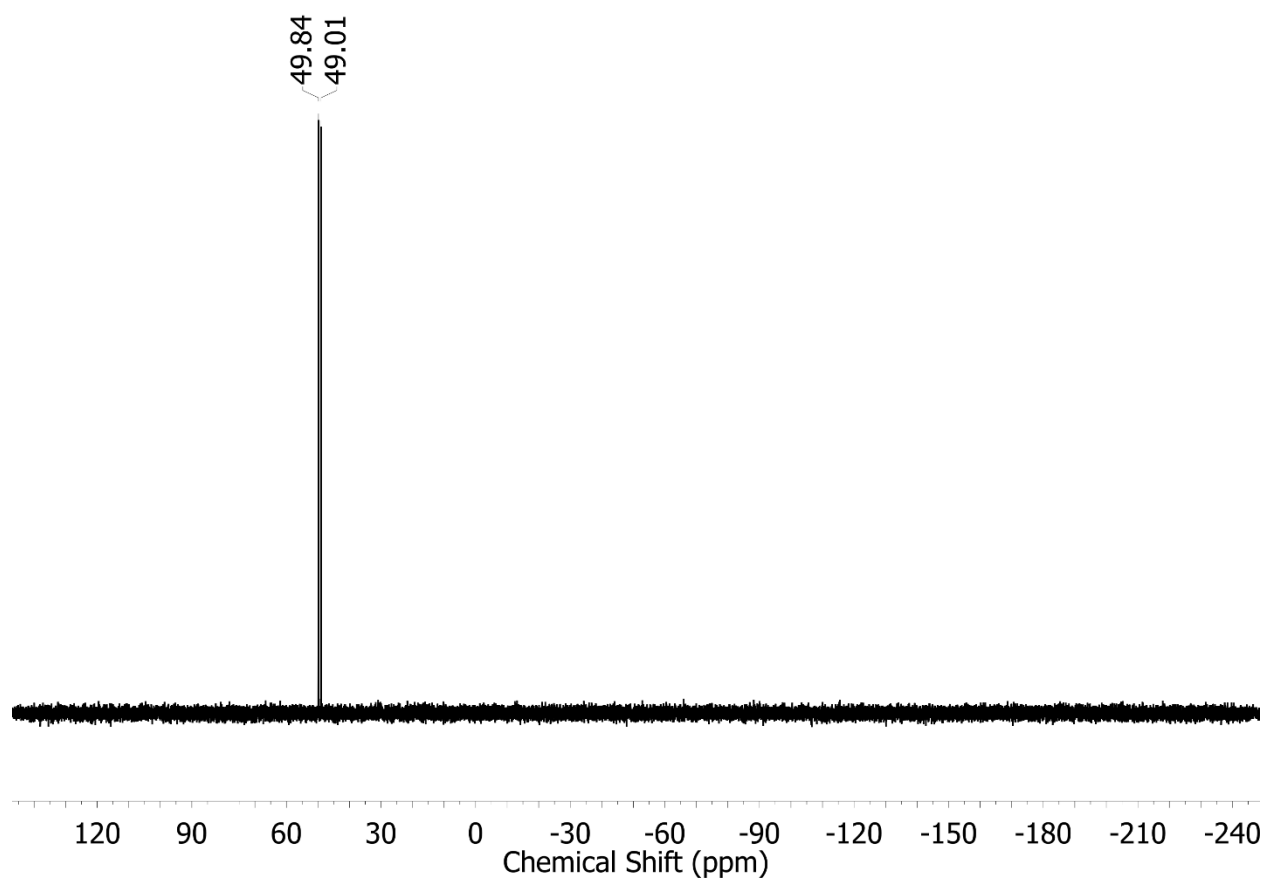

**Figure S30.**  $^{31}\text{P}\{^1\text{H}\}$  NMR spectrum (162 MHz,  $\text{CD}_3\text{CN}$ ) of **1-NCCH<sub>3</sub>**.

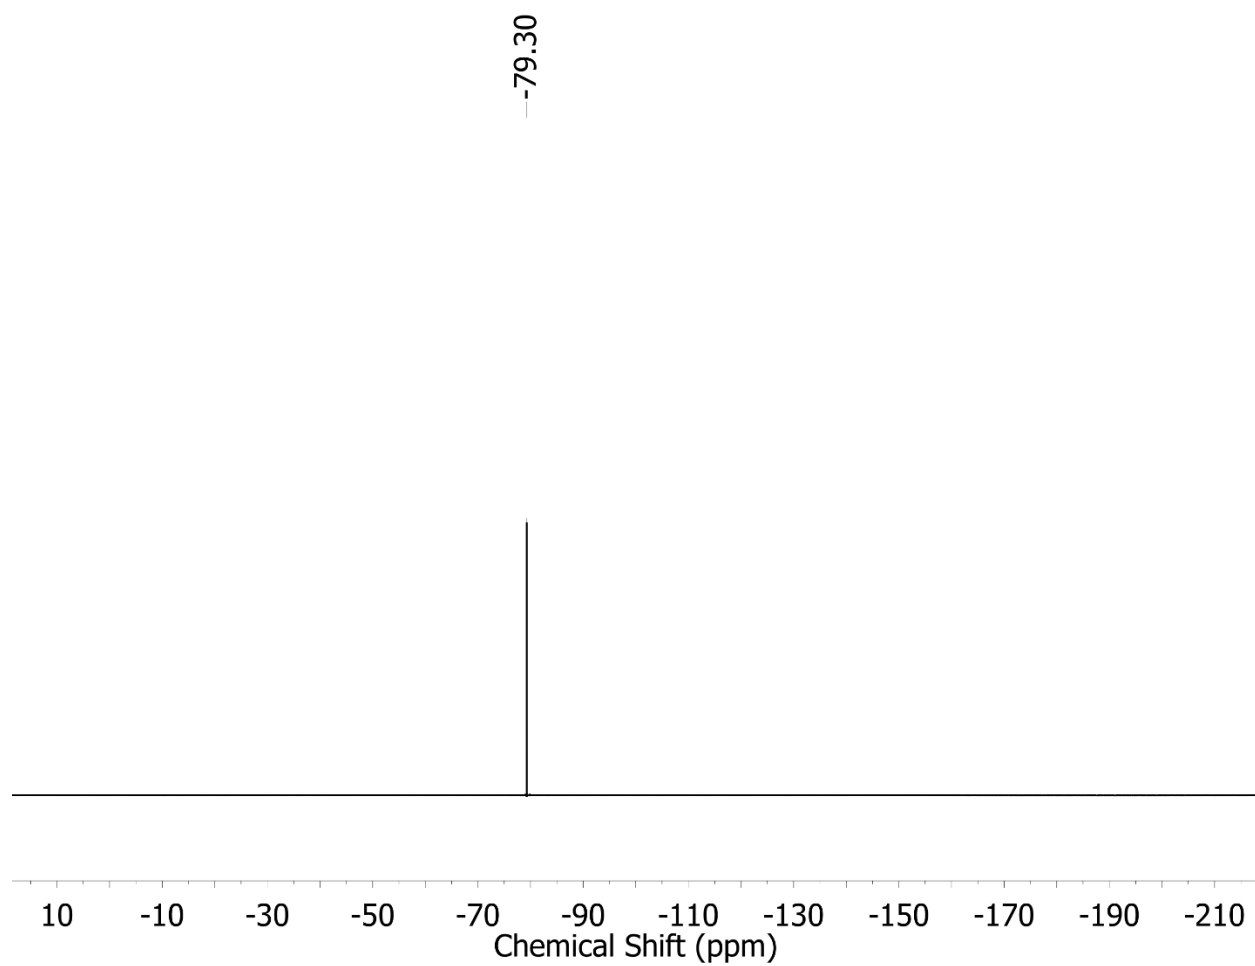

**Figure S31.**  $^{19}\text{F}$  NMR spectrum (162 MHz,  $\text{CD}_3\text{CN}$ ) of **1-NCCH<sub>3</sub>**.



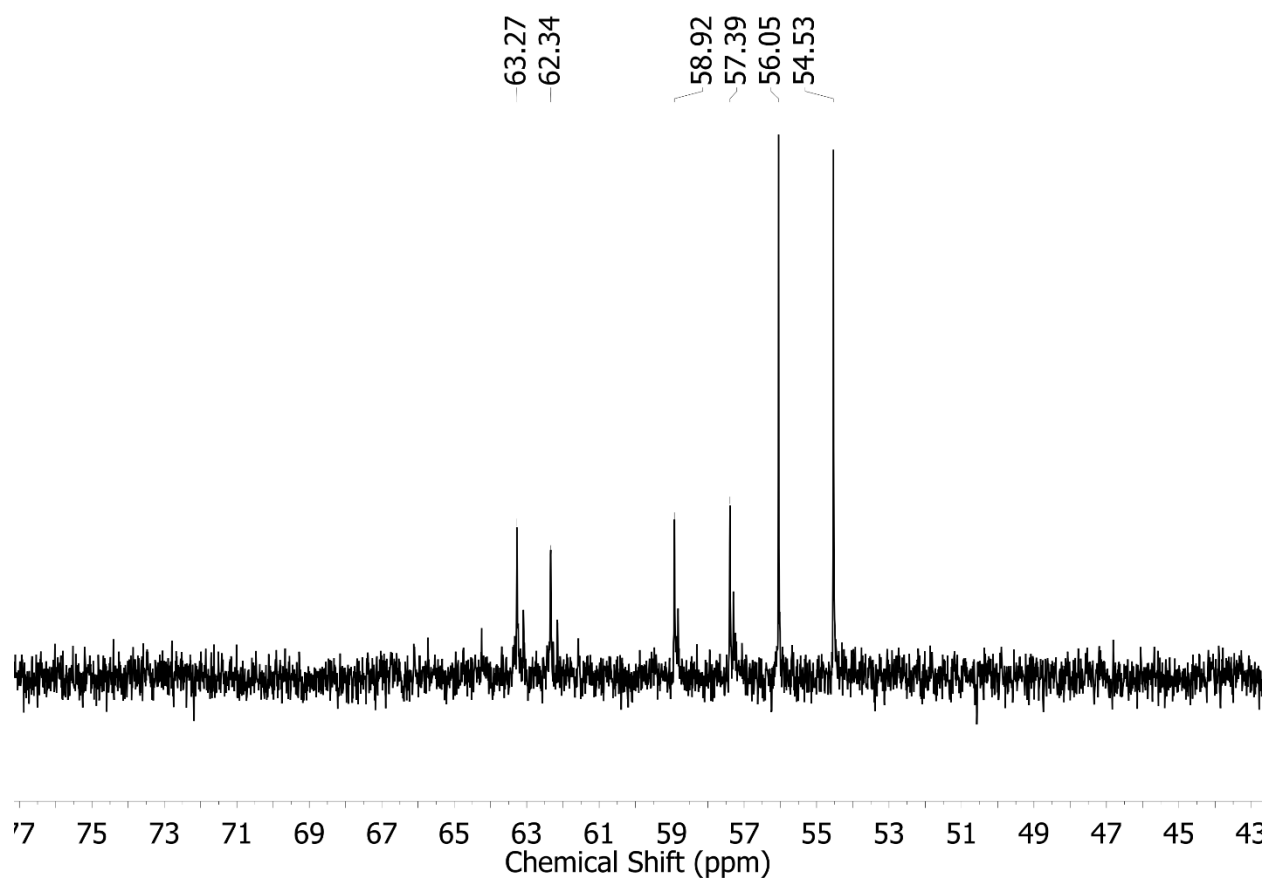

**Figure S32.**  $^{31}\text{P}\{^1\text{H}\}$  NMR spectrum (162 MHz,  $\text{C}_6\text{D}_6$ ) of aliquot from chemical reduction of **3** with decamethylcobalacene.

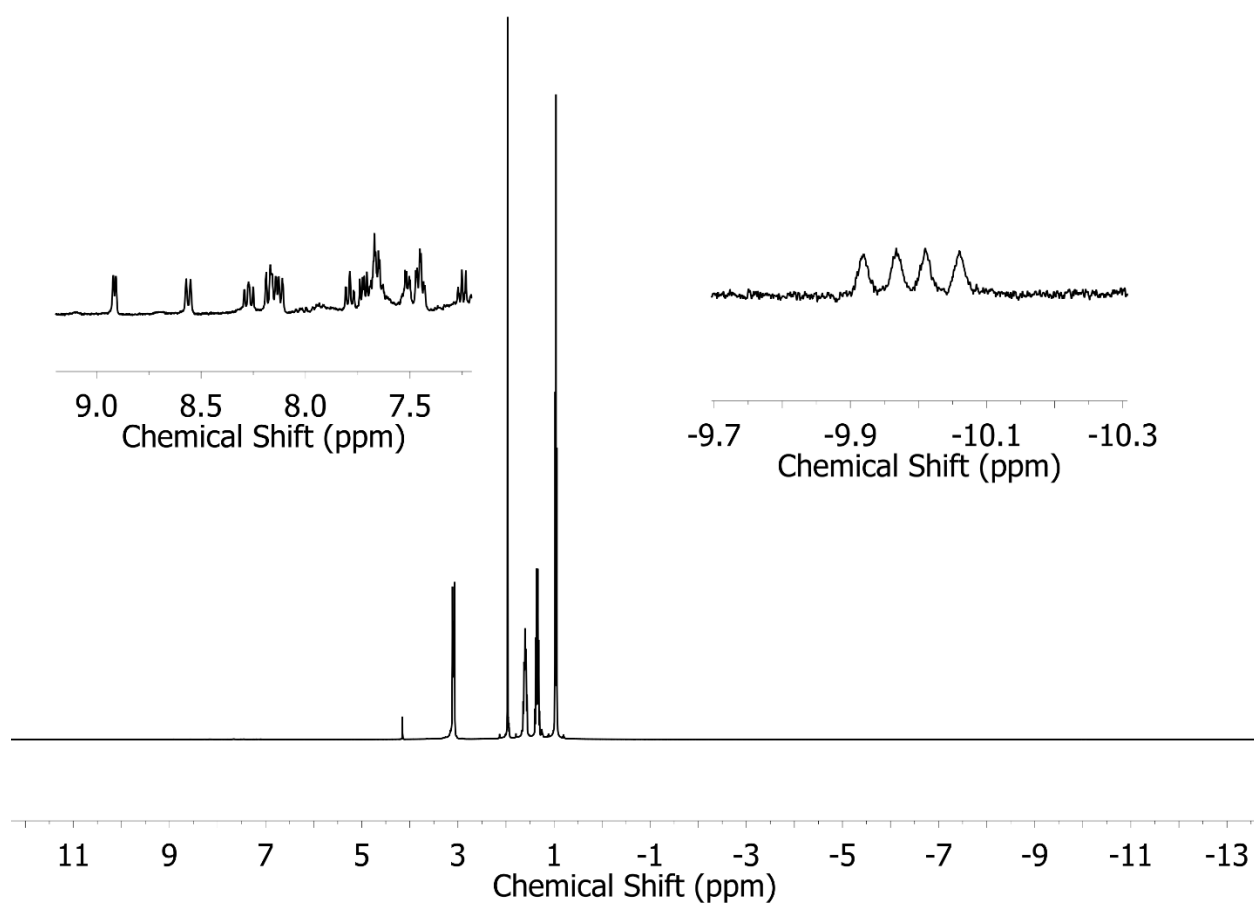

**Figure S33.**  $^1\text{H}$  NMR spectrum (162 MHz,  $\text{CD}_3\text{CN}$ ) of aliquot from bulk electrolysis of  $1\text{-NCCH}_3$  with 10 equiv. of  $\text{Et}_3\text{NH}^+\text{OTf}^-$ .

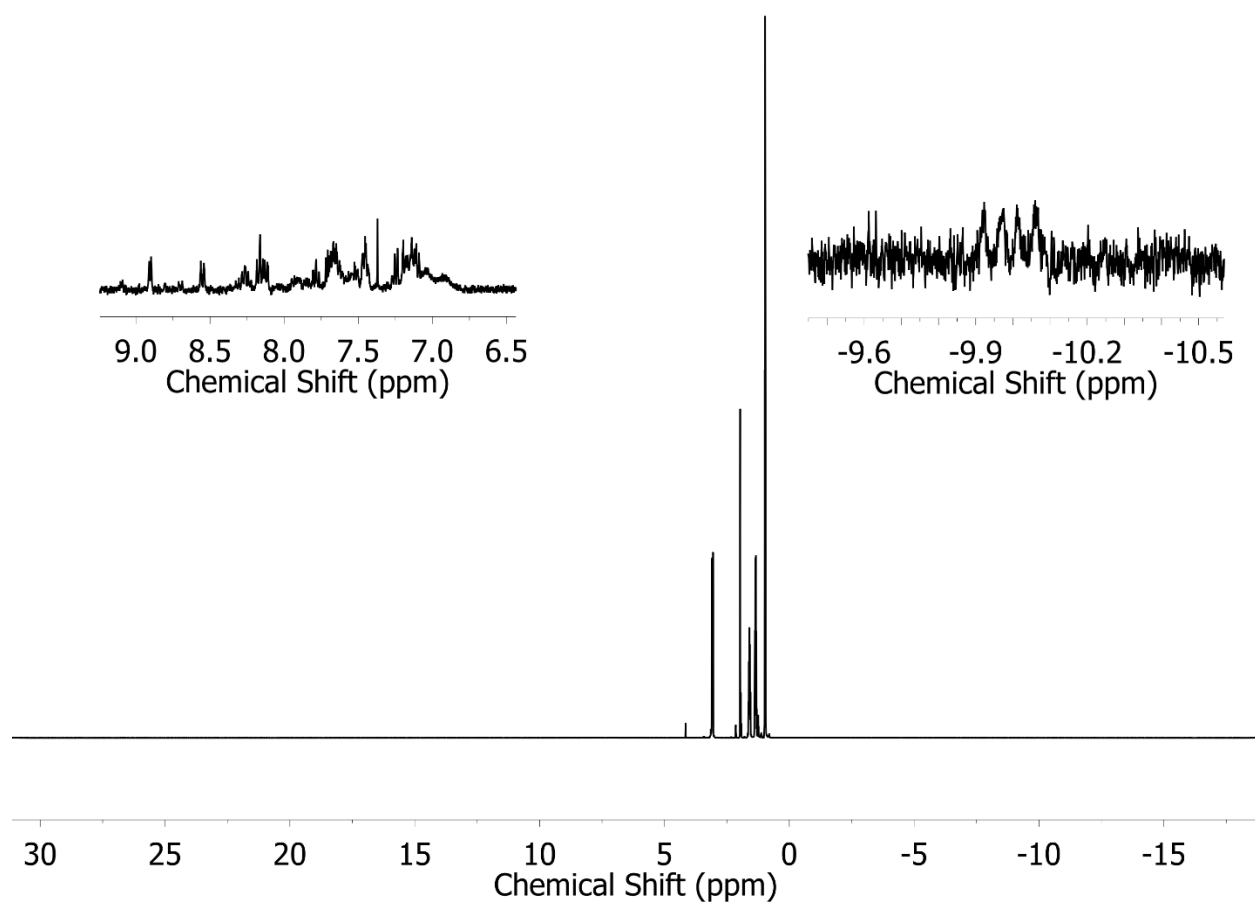

**Figure S34.**  $^1\text{H}$  NMR spectrum (162 MHz,  $\text{CD}_3\text{CN}$ ) of aliquot from bulk electrolysis of **1-Cl** with 10 equiv. of  $\text{Et}_3\text{NH}^+\text{OTf}^-$ .

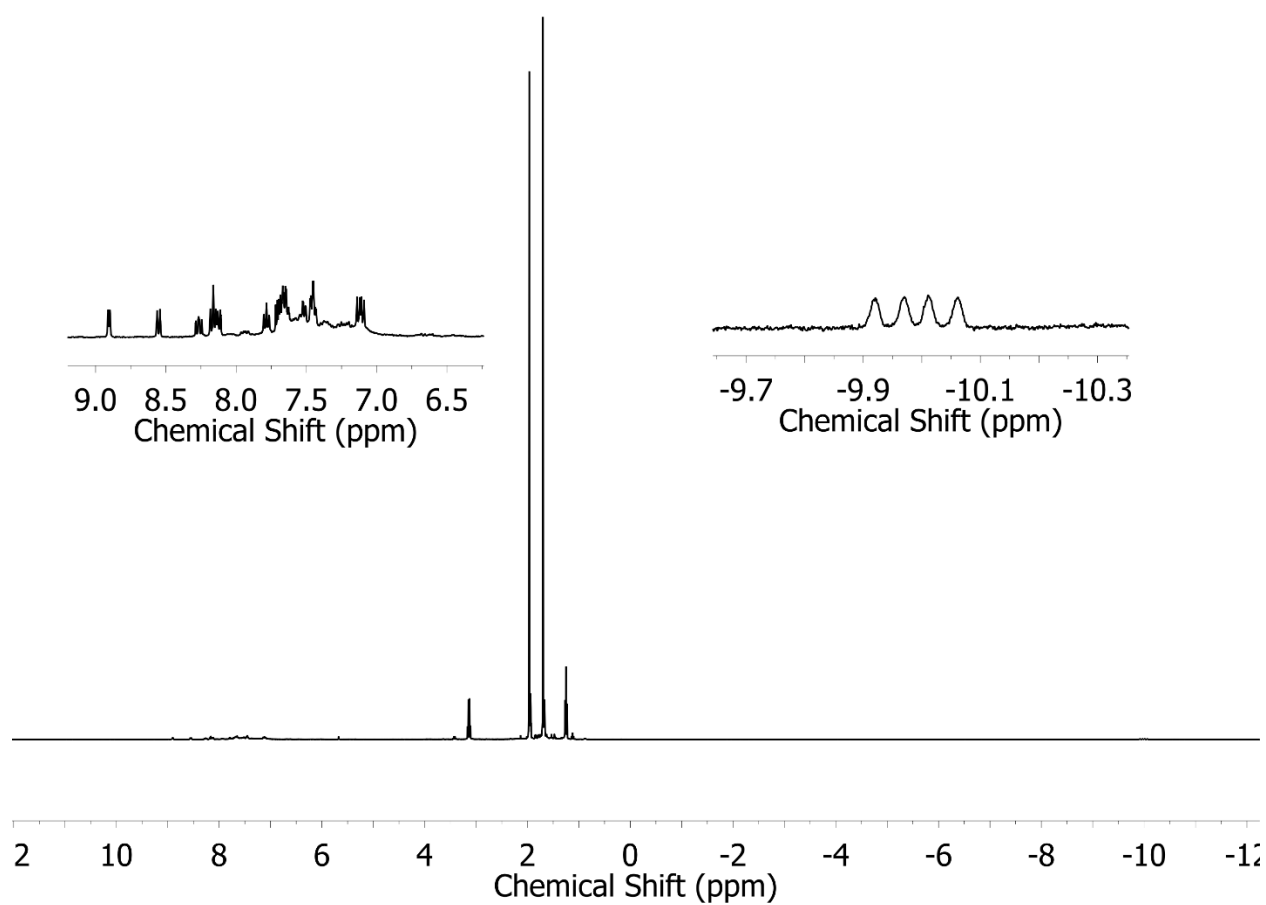

**Figure S35.**  $^1\text{H}$  NMR spectrum (162 MHz,  $\text{CD}_3\text{CN}$ ) of aliquot from chemical reduction of **3** with 1 equiv. of  $\text{Et}_3\text{NH}^+\text{OTf}^-$  and dcamethylcobaltacene.

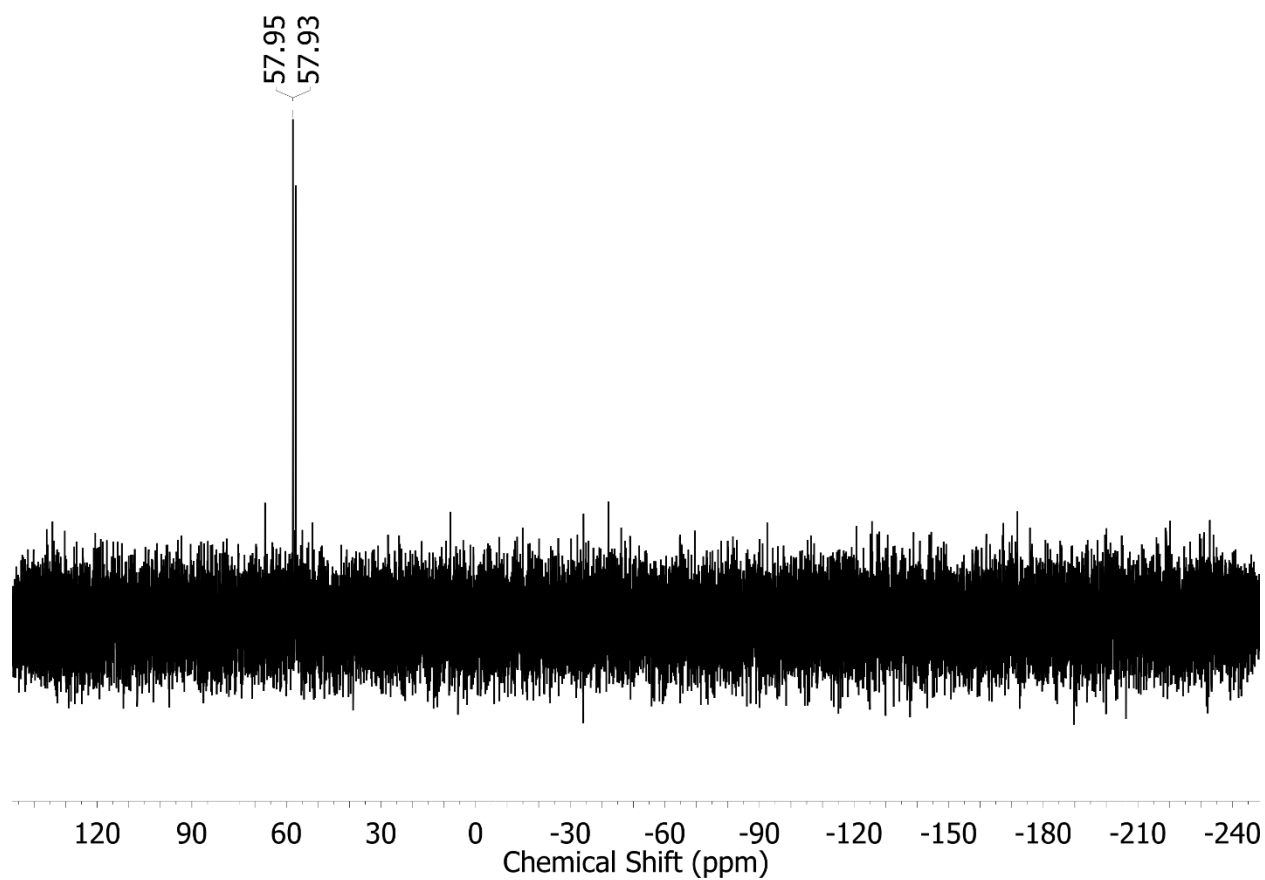

**Figure S36.**  $^{31}\text{P}\{^1\text{H}\}$  NMR spectrum (162 MHz,  $\text{CD}_3\text{CN}$ ) of aliquot from chemical reduction of **3** with 1 equiv. of  $\text{Et}_3\text{NH}^+\text{OTf}^-$  and decamethylcobaltacene.

## UV-Vis

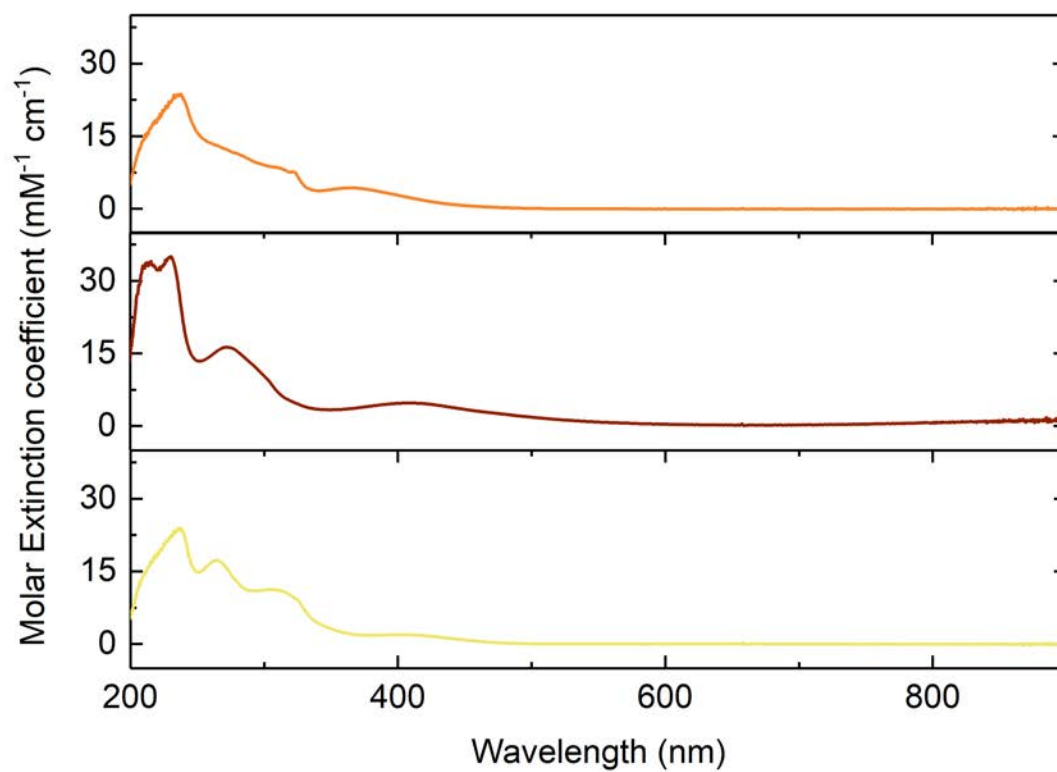

**Figure S37.** Electronic absorption spectra of **1-Cl** (upper panel), **2** (middle panel), and **3** (lower panel) in CH<sub>3</sub>CN.

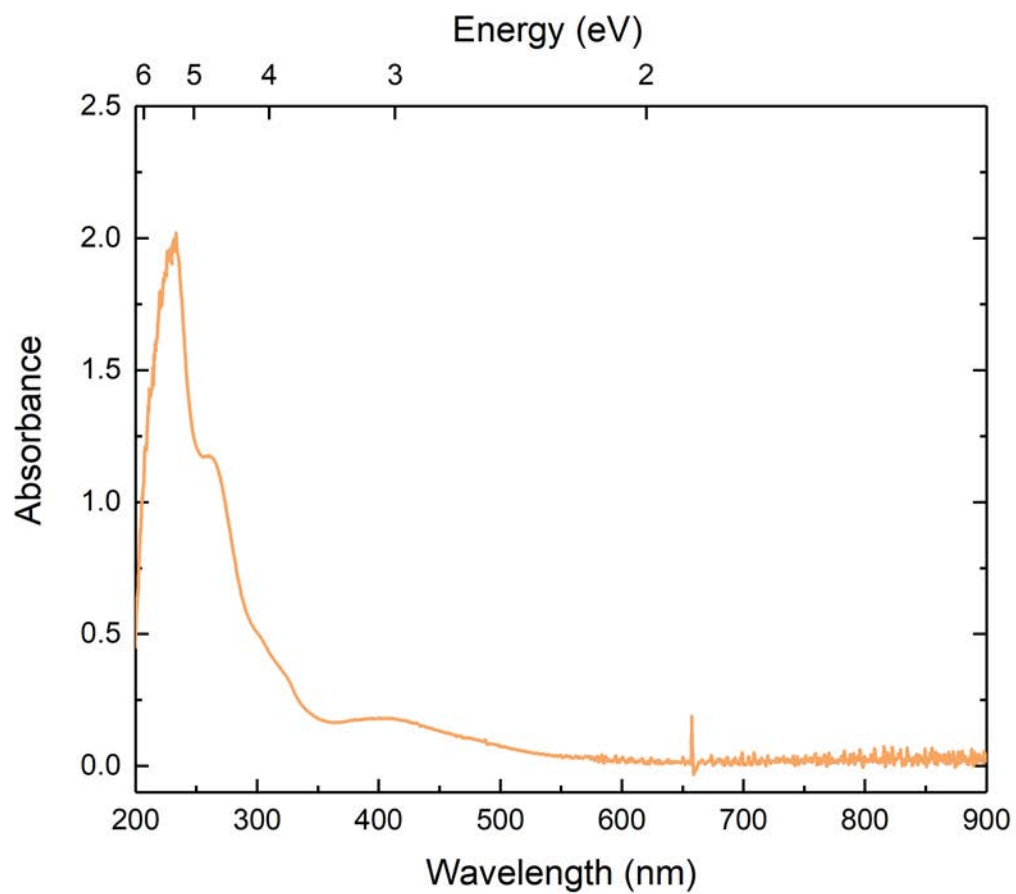

**Figure S38.** Electronic absorption spectrum of aliquot ( $\text{CH}_3\text{CN}$ ) from bulk electrolysis of **3**.

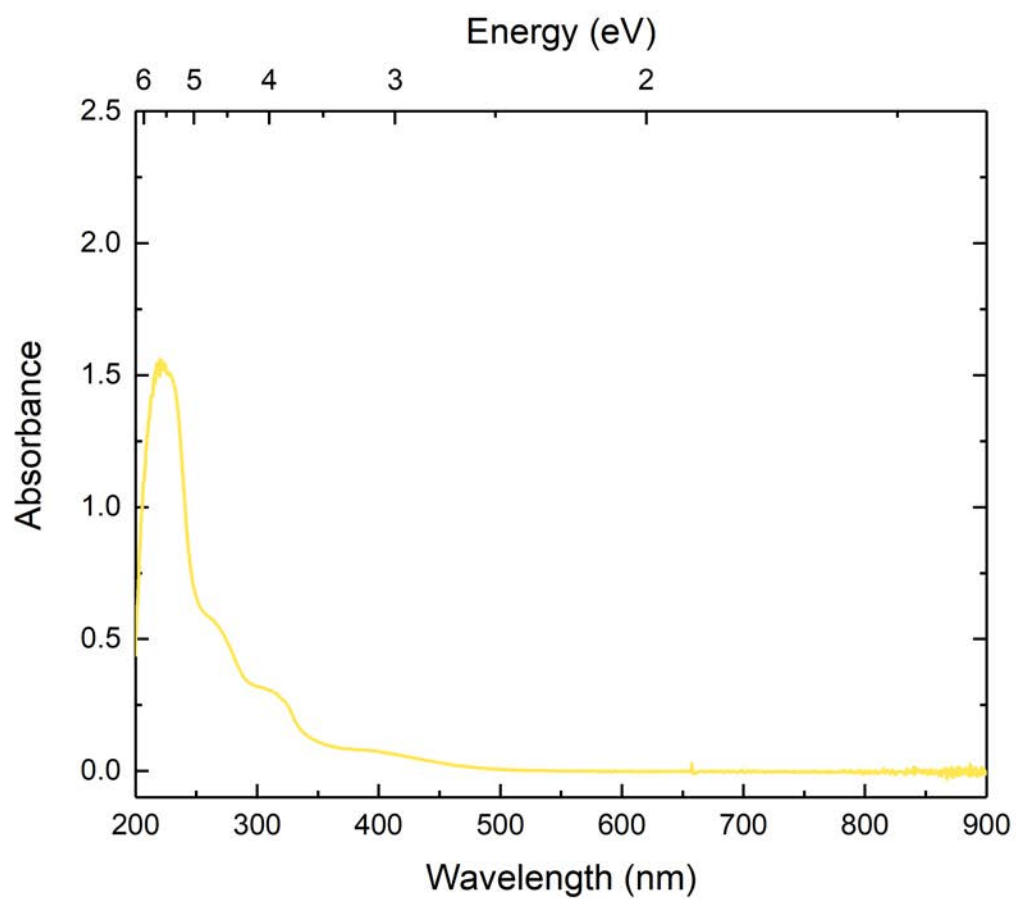

**Figure S39.** Electronic absorption spectrum of aliquot ( $\text{CH}_3\text{CN}$ ) from bulk electrolysis of for **1-NCCH<sub>3</sub>** with 10 equiv. of  $\text{Et}_3\text{NH}^+\text{OTf}^-$ .



## Electrochemistry

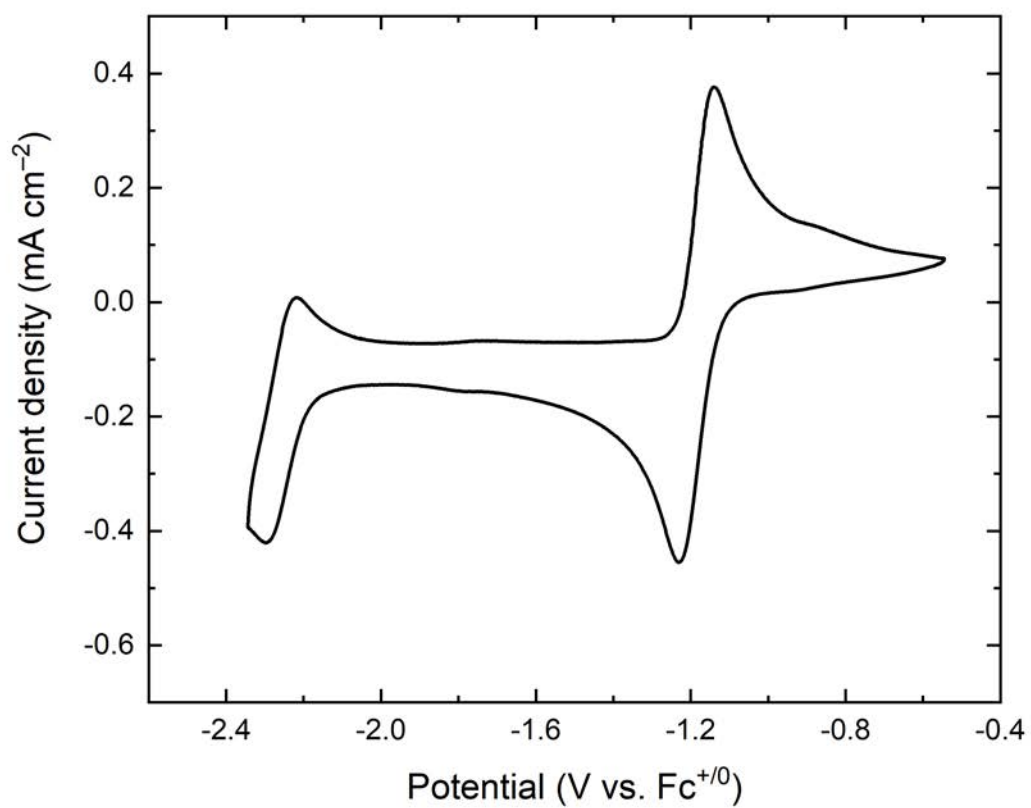

**Figure S40.** Cyclic voltammetry of **1-Cl** (CH<sub>3</sub>CN, 0.1 M [<sup>n</sup>Bu<sub>4</sub>N][PF<sub>6</sub>], 100 mV/s)

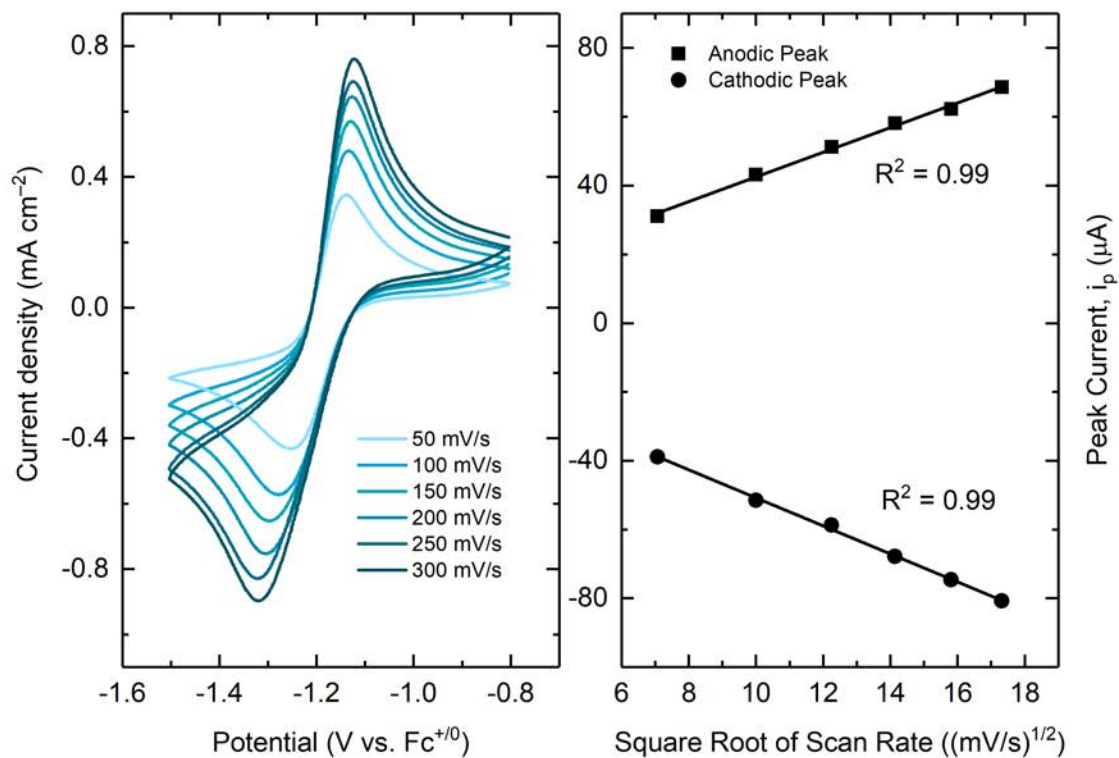

**Figure S41.** Left: cyclic voltammetry of first reduction event **1-Cl** at varying scan rate in CH<sub>3</sub>CN (0.1 M [nBu<sub>4</sub>N][PF<sub>6</sub>]). Right: linear dependence of peak cathodic current on square root of scan rate with the y-intercept set to 0.

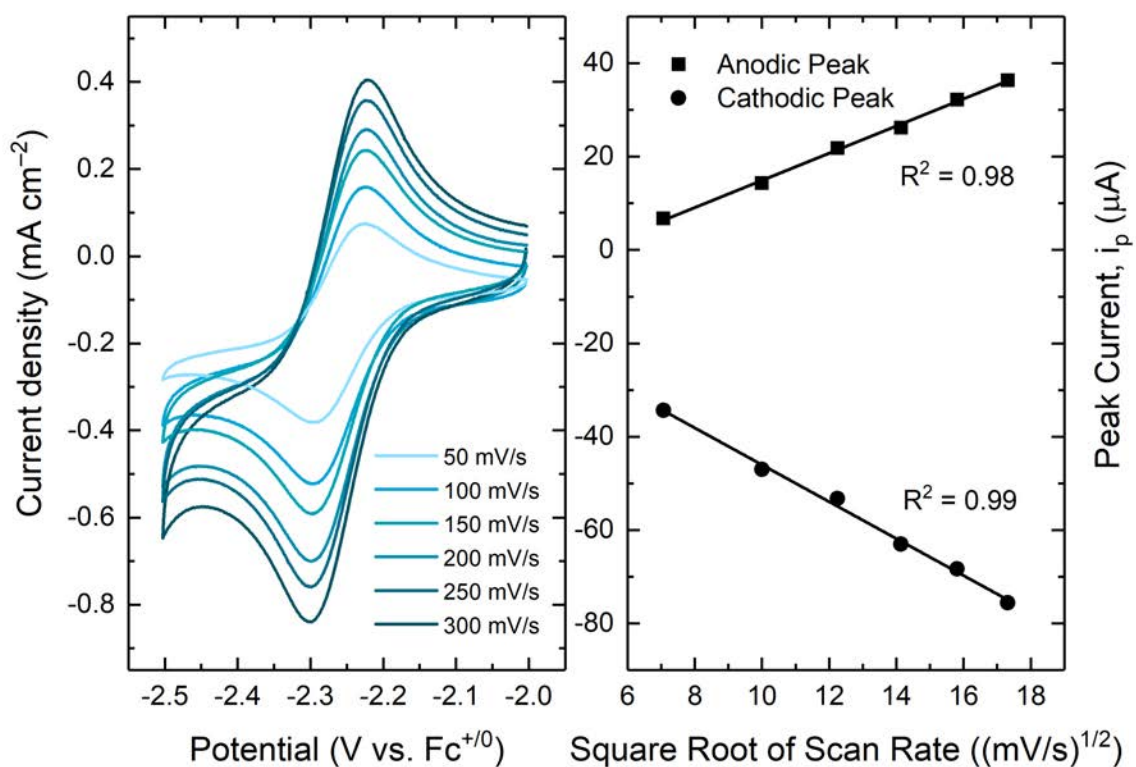

**Figure S42.** Left: cyclic voltammetry of second reduction event **1-Cl** at varying scan rate in CH<sub>3</sub>CN (0.1 M [nBu<sub>4</sub>N][PF<sub>6</sub>]). Right: linear dependence of peak cathodic current on square root of scan rate.

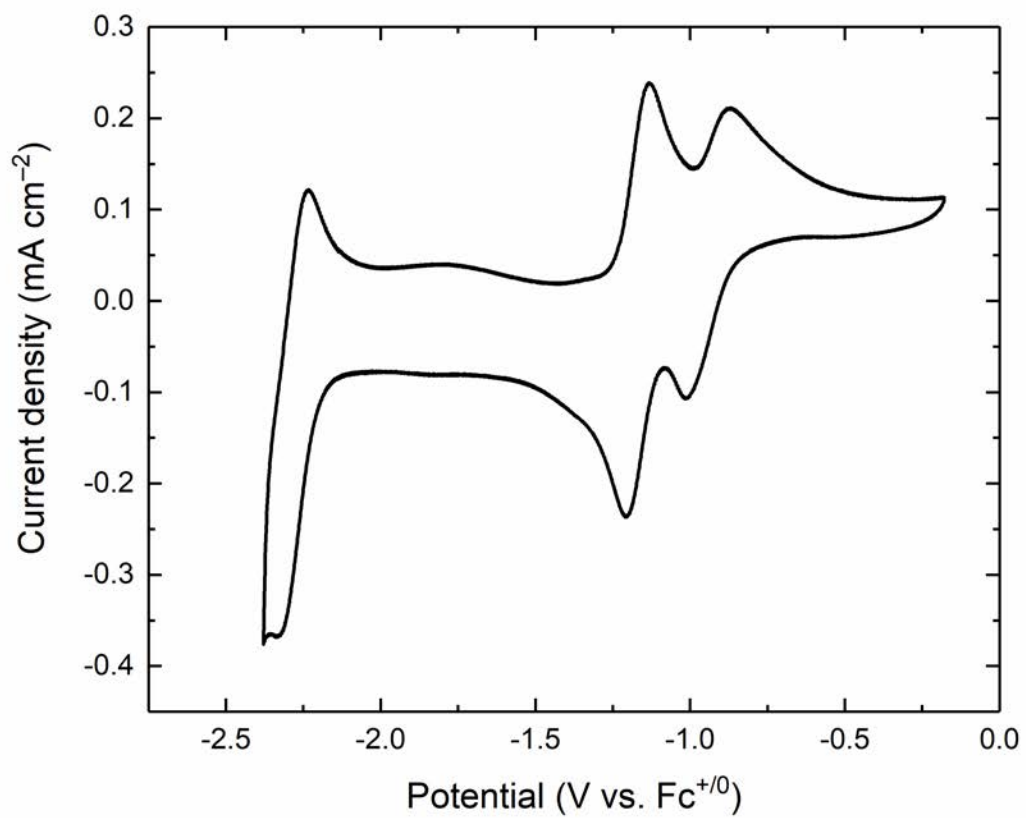

**Figure S43.** Cyclic voltammetry of **1-NCCH<sub>3</sub>** (CH<sub>3</sub>CN, 0.1 M [<sup>n</sup>Bu<sub>4</sub>N][PF<sub>6</sub>], 100 mV/s).

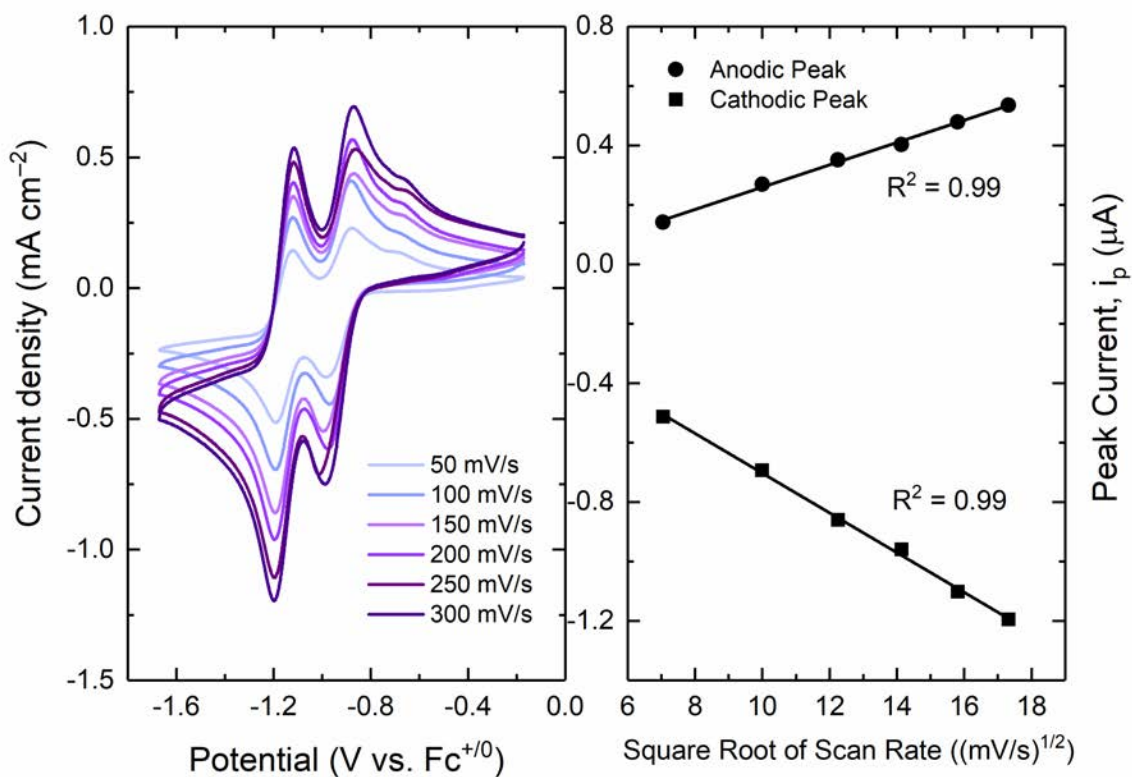

**Figure S44.** Left: cyclic voltammetry of second reduction event **1-NCCH<sub>3</sub>** at varying scan rate in CH<sub>3</sub>CN (0.1 M [<sup>n</sup>Bu<sub>4</sub>N][PF<sub>6</sub>]). Right: linear dependence of peak cathodic current on square root of scan rate.

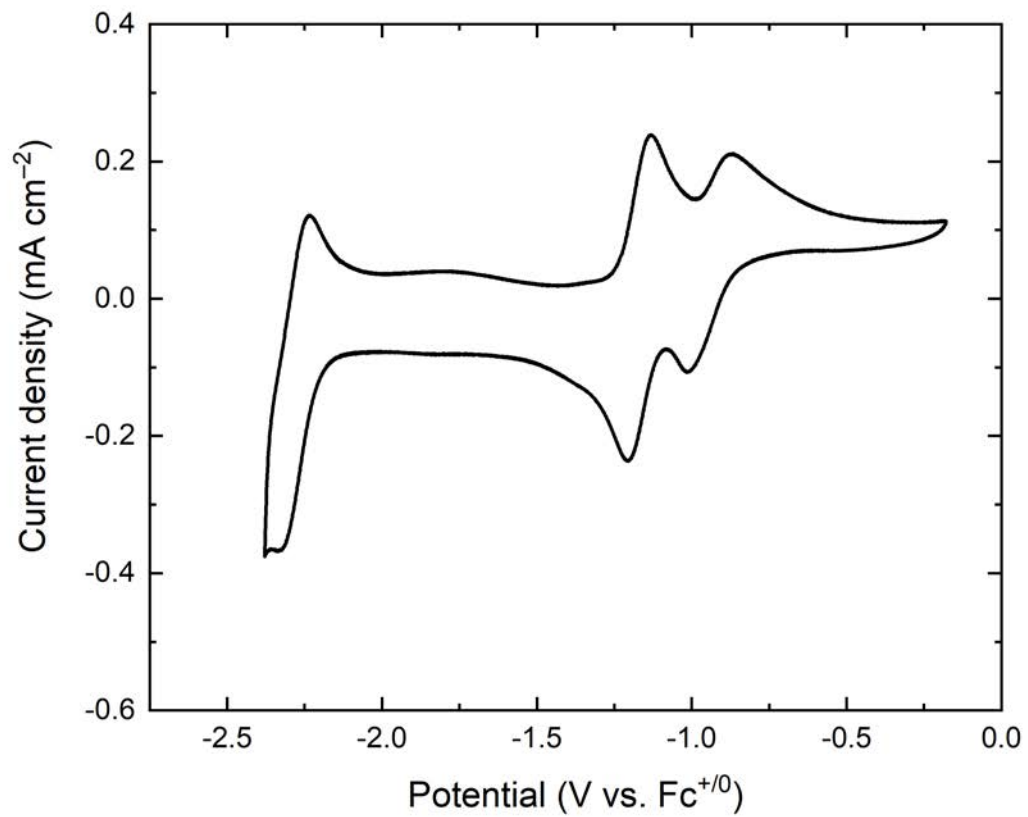

**Figure S45.** Cyclic voltammetry of **2** (CH<sub>3</sub>CN, 0.1 M [nBu<sub>4</sub>N][PF<sub>6</sub>], 100 mV/s)

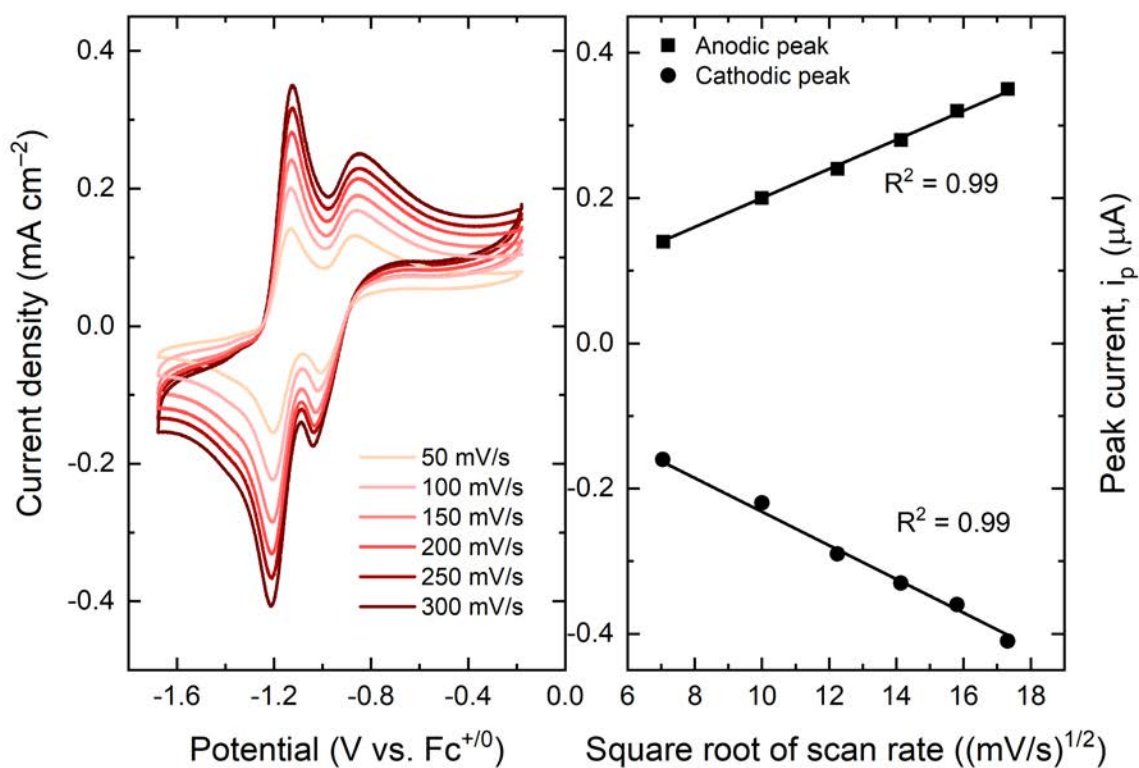

**Figure S46.** Left: cyclic voltammetry of **2** at varying scan rate in CH<sub>3</sub>CN (0.1 M [nBu<sub>4</sub>N][PF<sub>6</sub>]). Right: linear dependence of peak cathodic current on square root of scan rate with the y-intercept set to 0.

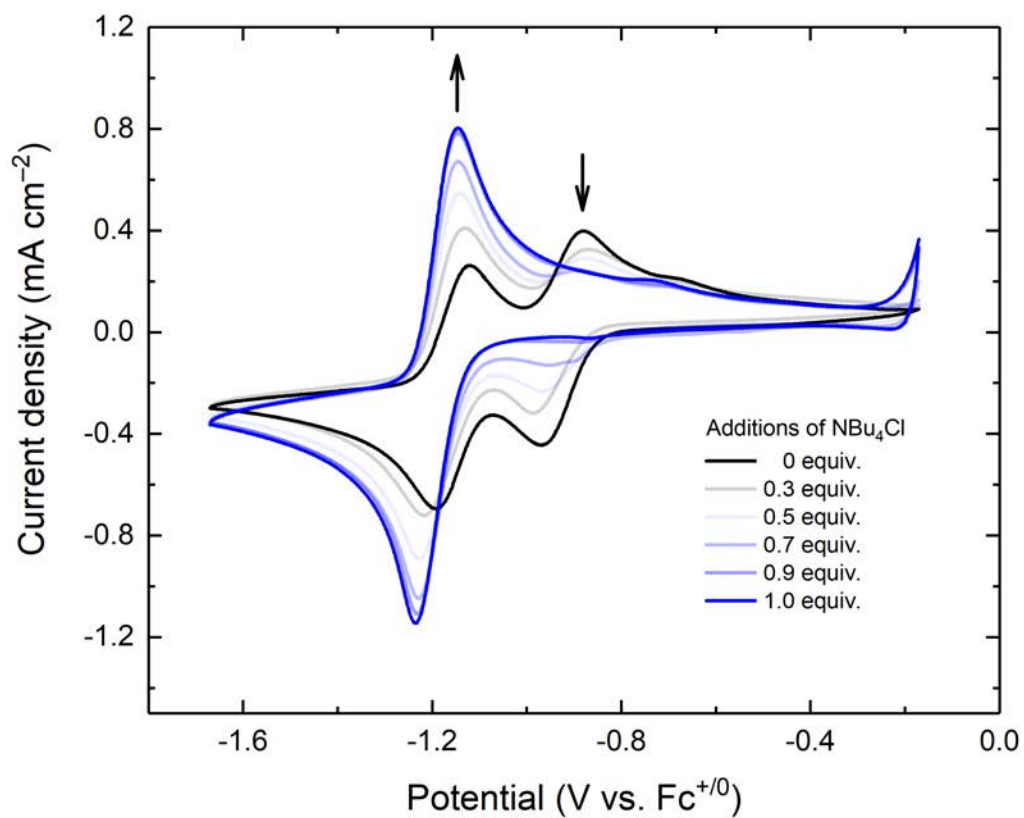

**Figure S47.** Titration of 1-NCCH<sub>3</sub> [nBu<sub>4</sub>N][PF<sub>6</sub>] solution with increasing equivalents of [nBu<sub>4</sub>N][Cl] (CH<sub>3</sub>CN, 0.1 M [nBu<sub>4</sub>N][PF<sub>6</sub>], 100 mV/s).



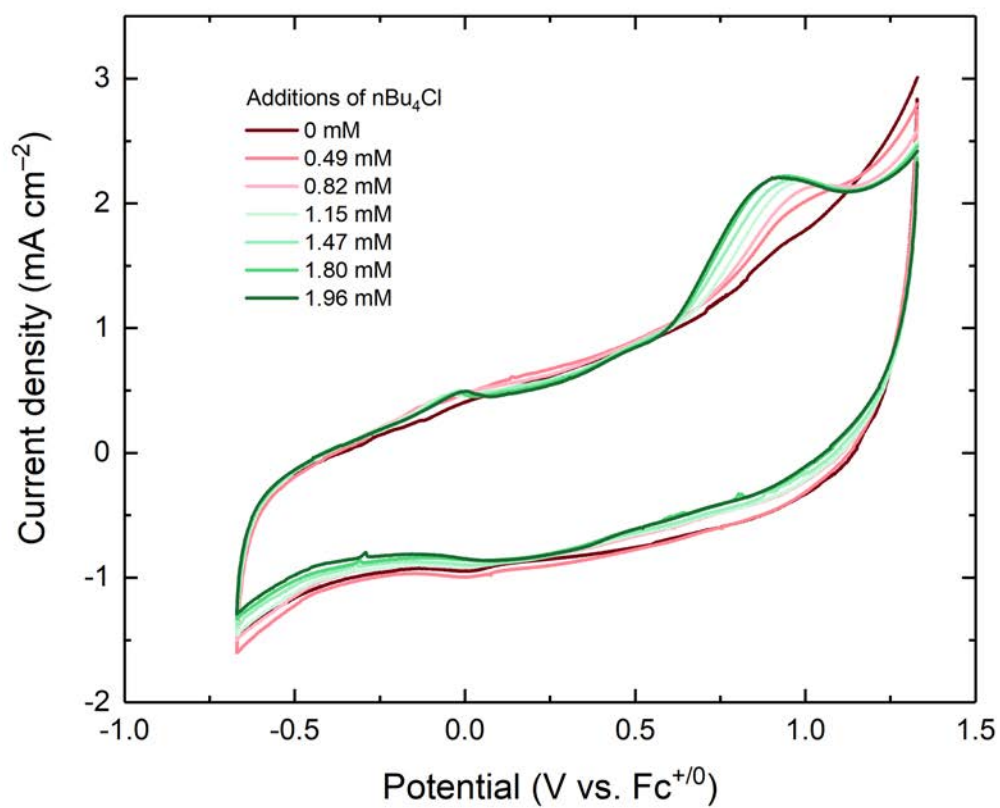

**Figure S48.** Titration of blank 0.1M [nBu<sub>4</sub>N][PF<sub>6</sub>] solution with increasing equivalents of [nBu<sub>4</sub>N][Cl] (CH<sub>3</sub>CN, 0.1 M [nBu<sub>4</sub>N][PF<sub>6</sub>], 100 mV/s).

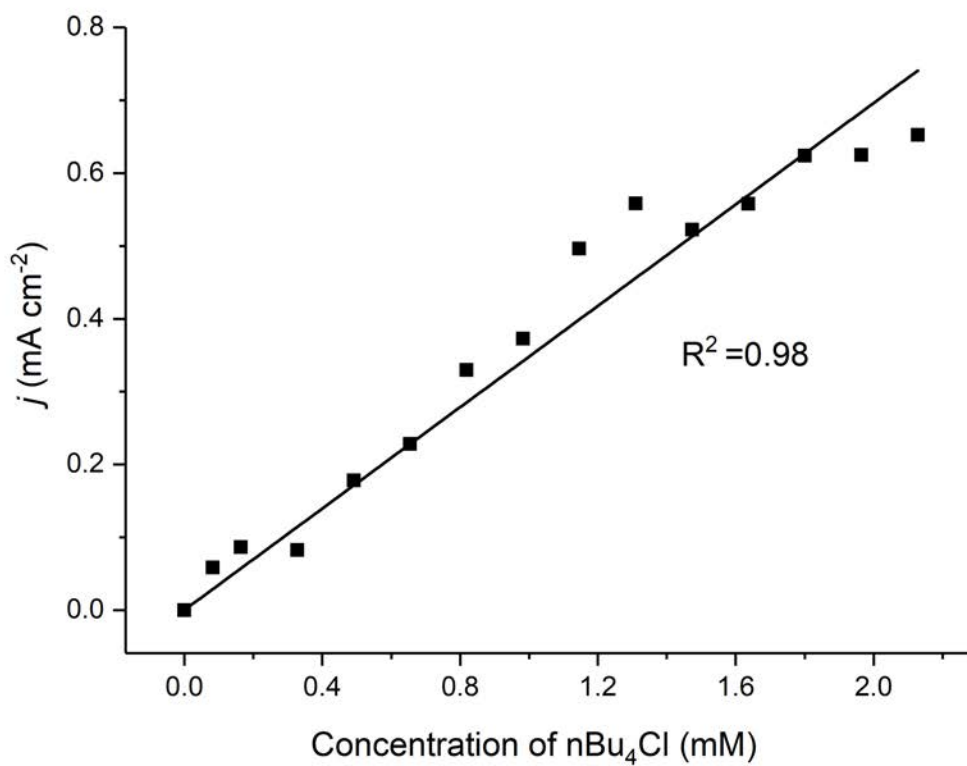

**Figure S49.** Linear regression of  $i_{pa}$  vs. concentration of  $[nBu_4N][Cl]$ . Titration of blank 0.1M  $[nBu_4N][PF_6]$  solution with increasing equivalents of  $[nBu_4N][Cl]$  ( $CH_3CN$ , 0.1 M  $[nBu_4N][PF_6]$ , 100 mV/s).

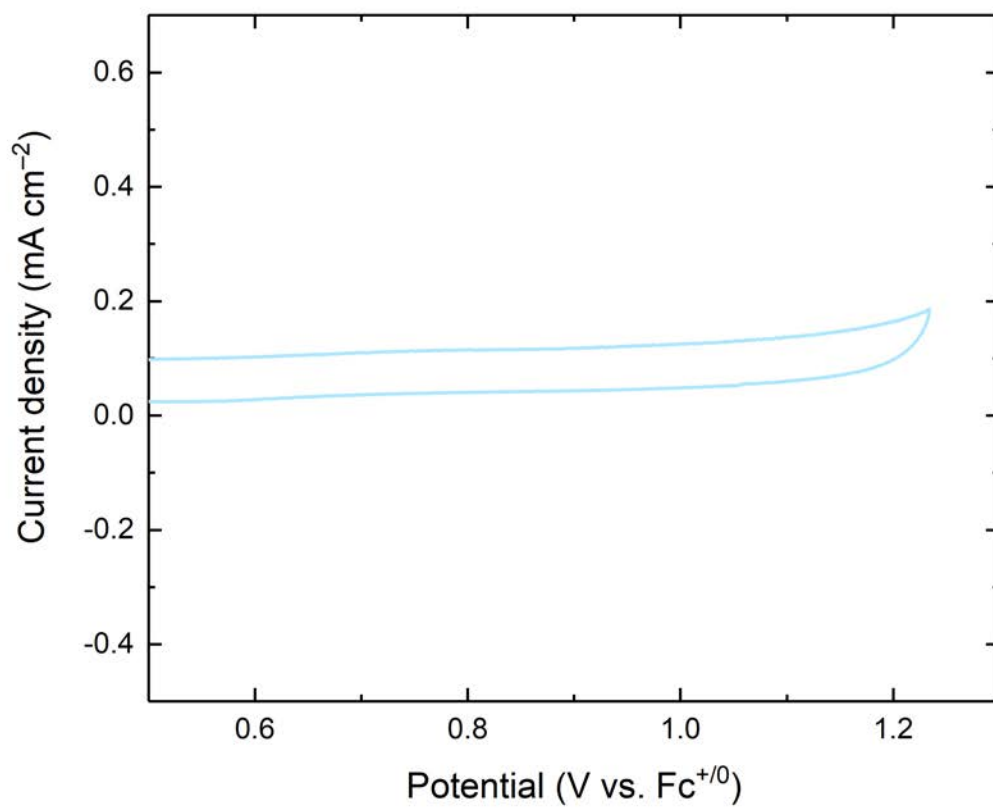

**Figure S50.** CV of chloride oxidation region of **2** (CH<sub>3</sub>CN, 0.1 M [nBu<sub>4</sub>N][PF<sub>6</sub>], 100 mV/s).

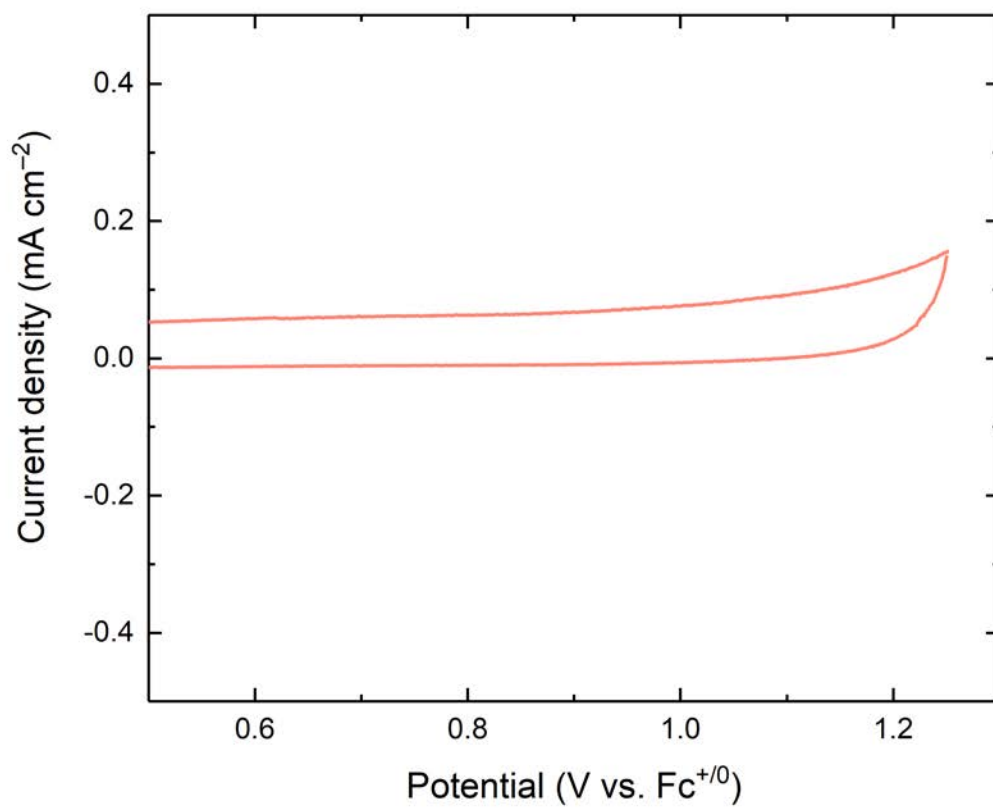

**Figure S51.** CV of chloride oxidation region of **1-NCCH<sub>3</sub>** (CH<sub>3</sub>CN, 0.1 M [<sup>n</sup>Bu<sub>4</sub>N][PF<sub>6</sub>], 100 mV/s).

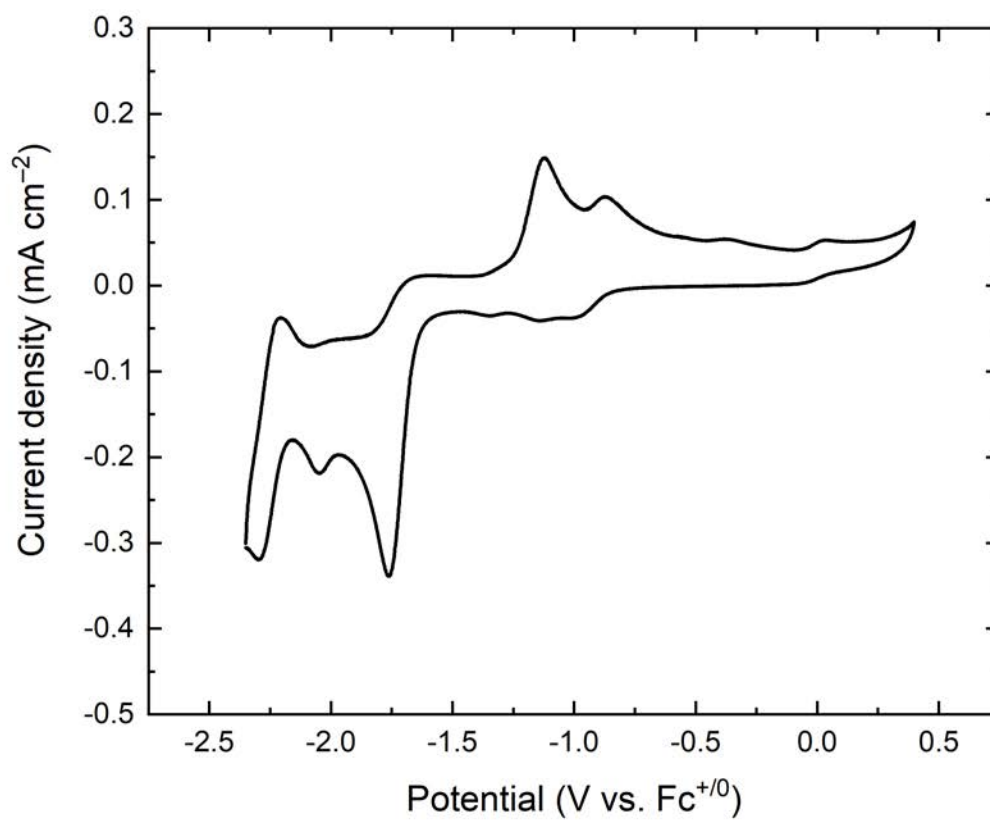

**Figure S52.** Cyclic voltammetry of **3** ( $\text{CH}_3\text{CN}$ , 0.1 M  $[\text{nBu}_4\text{N}][\text{PF}_6]$ , 100 mV/s)

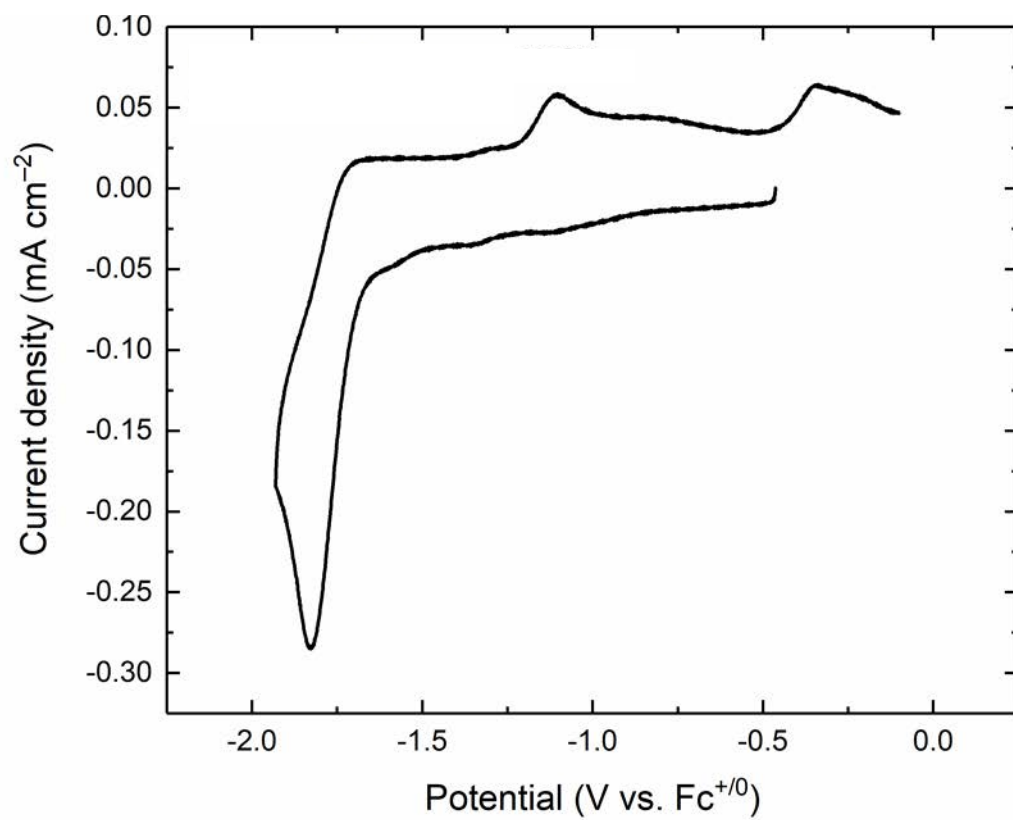

**Figure S53.** Cyclic voltammetry of **3** (CH<sub>3</sub>CN, 0.1 M [nBu<sub>4</sub>N][PF<sub>6</sub>], 4000 mV/s).

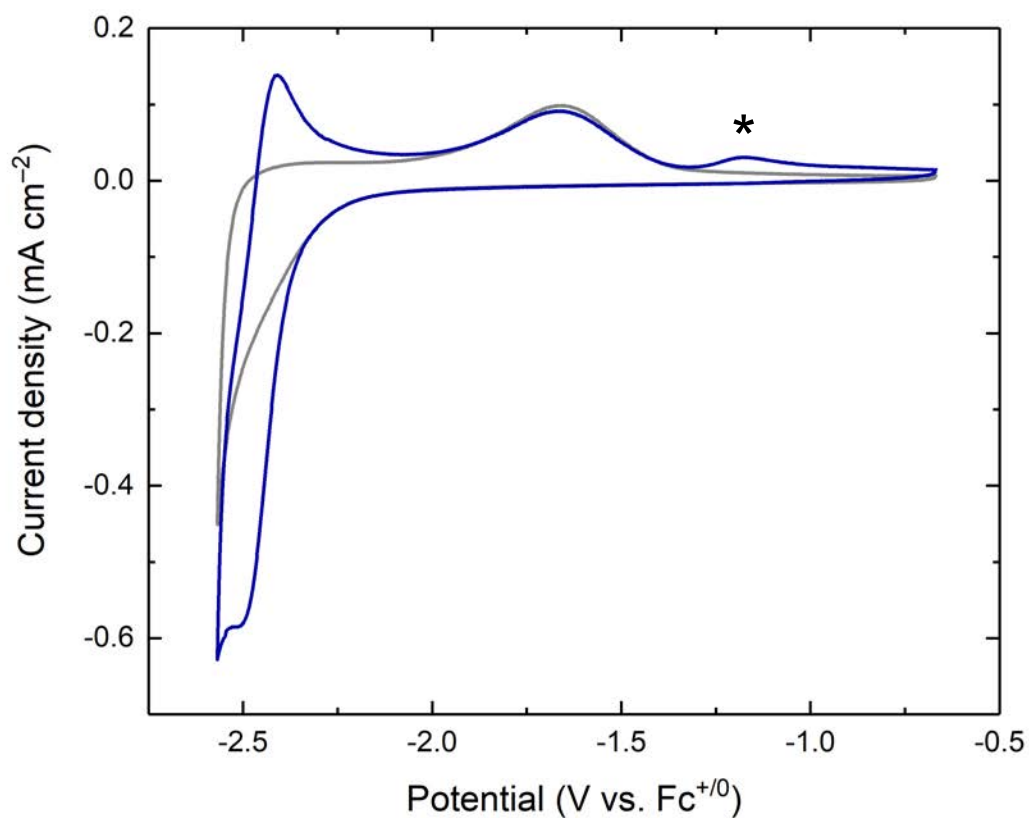

**Figure S54.** Cyclic voltammetry of PQN ( $\text{CH}_3\text{CN}$ , 0.1 M  $[\text{nBu}_4\text{N}][\text{PF}_6]$ , 100 mV/s) (\*) denotes an anodic, electrode-based process resulting from cathodic scanning to rather negative potentials.

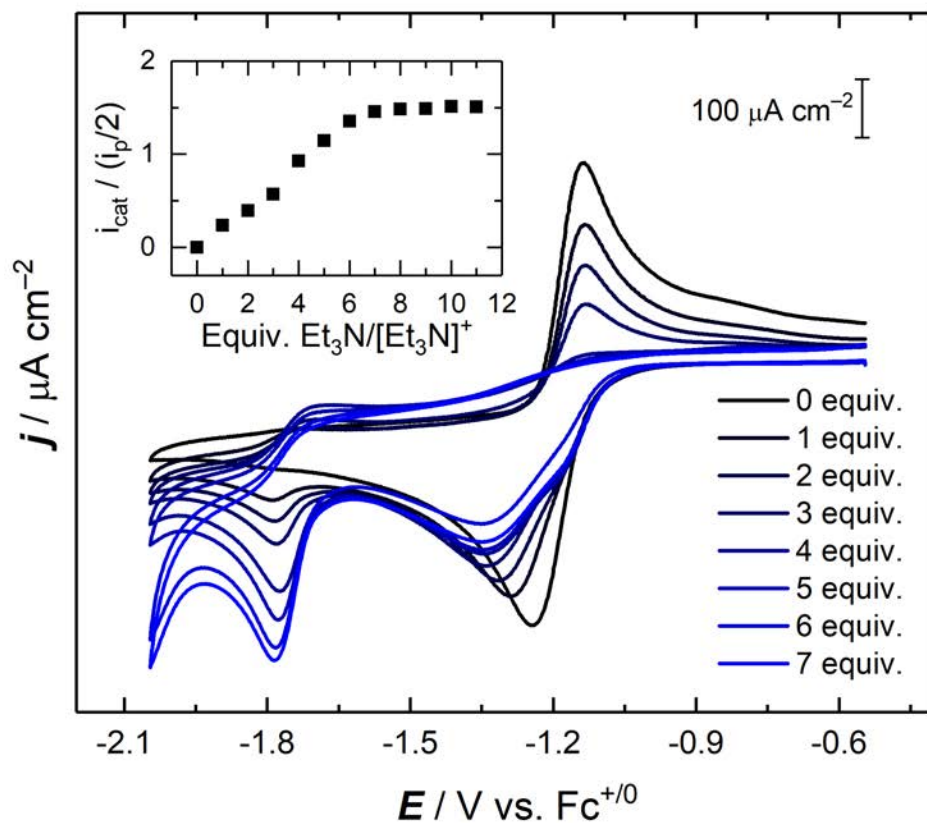

**Figure S55.** Cyclic voltammetry of **1-Cl** with 1 equiv. of  $[\text{Et}_3\text{NH}]^+/\text{Et}_3\text{N}$  in 50  $\mu\text{L}$  additions ( $\text{CH}_3\text{CN}$ , 0.1 M  $[\text{nBu}_4\text{N}][\text{PF}_6]$ , 100 mV/s). (Inset): Plot of  $i_{\text{cat}}/(i_{\text{p}}/2)$  vs equivalents (mMol) of  $[\text{Et}_3\text{NH}]^+/\text{Et}_3\text{N}$  added.



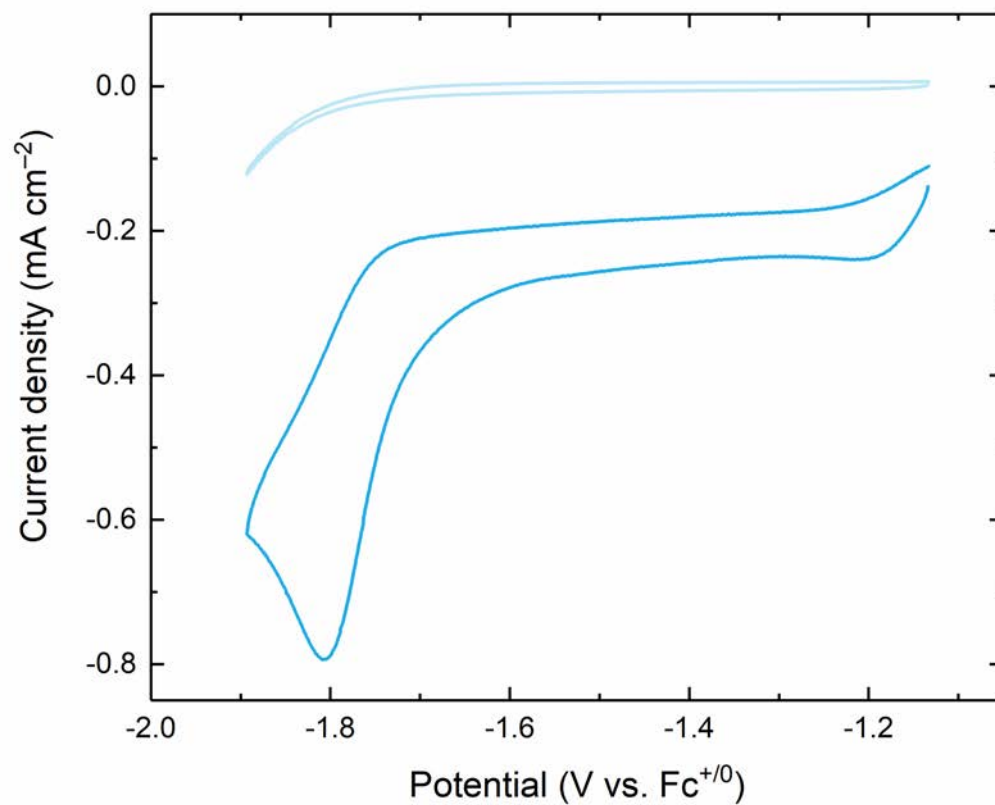

**Figure S56.** Cyclic voltammetry of Et<sub>3</sub>NH<sup>+</sup>OTf<sup>-</sup> (top); **1-Cl** and 1 equiv. of Et<sub>3</sub>NH<sup>+</sup>OTf<sup>-</sup> (bottom) (CH<sub>3</sub>CN, 0.1 M [nBu<sub>4</sub>N][PF<sub>6</sub>], 100 mV/s).

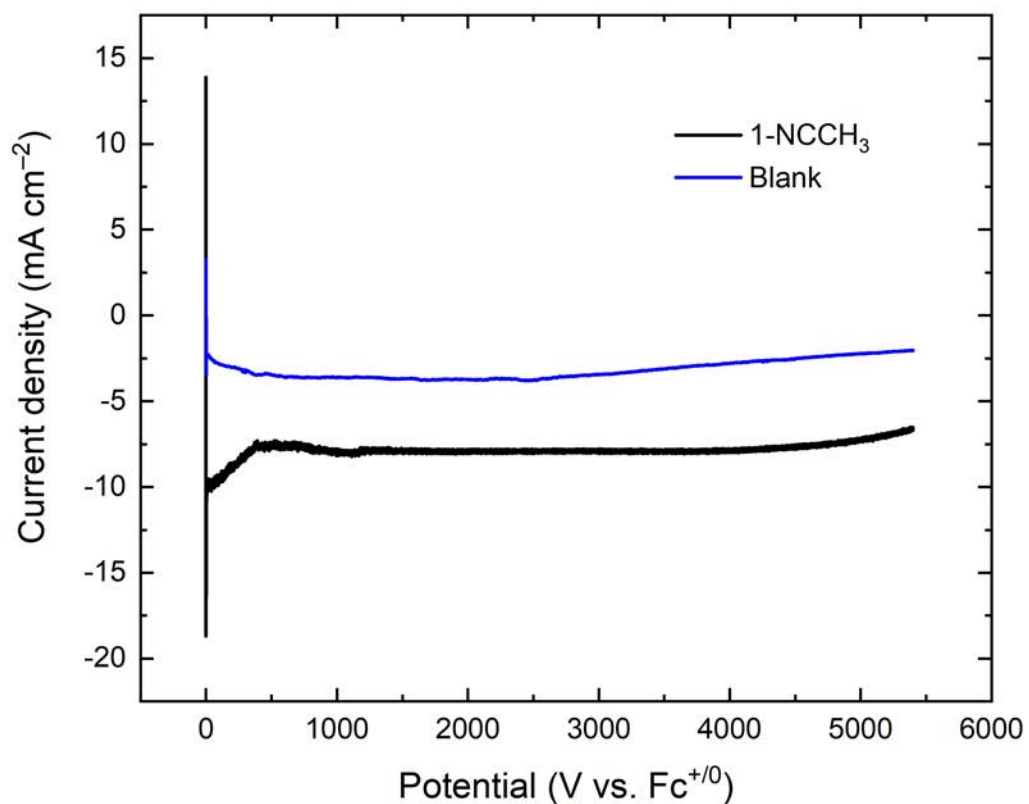

**Figure S57.** Chronoamperometry experiments conducted during bulk electrolyses with 1 mM **1-NCCH<sub>3</sub>** plus acid (black line) and an acid-only blank (blue line). Polarization at  $-1.75$  V vs  $\text{Fc}^{+/0}$ . Ten equivalents of ferrocene included as sacrificial reductant, and 10 equivalents of  $[\text{Et}_3\text{NH}]\text{Br}$  added as the acid. Supporting electrolyte was 0.1 M  $[\text{nBu}_4\text{N}][\text{PF}_6]$  in each case.

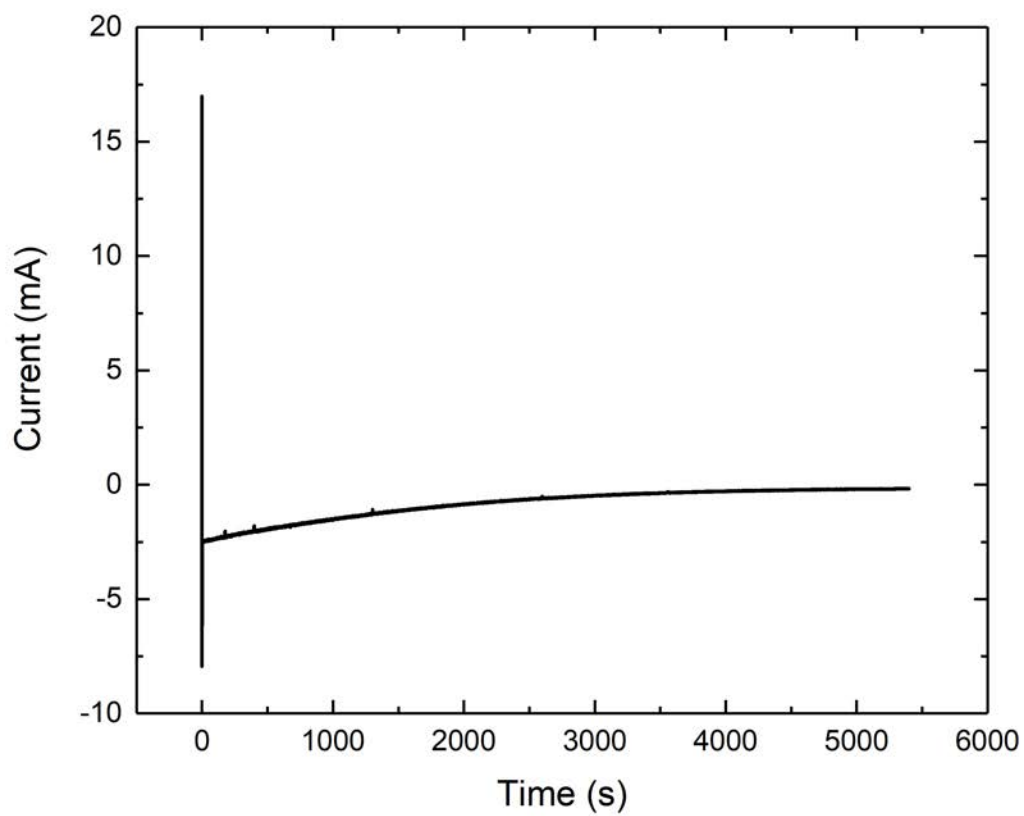

**Figure S58.** Bulk electrolysis data for **3** polarized at  $-1.75$  V ( $\text{CH}_3\text{CN}$ ,  $0.1$  M  $[\text{nBu}_4\text{N}][\text{PF}_6]$ ).

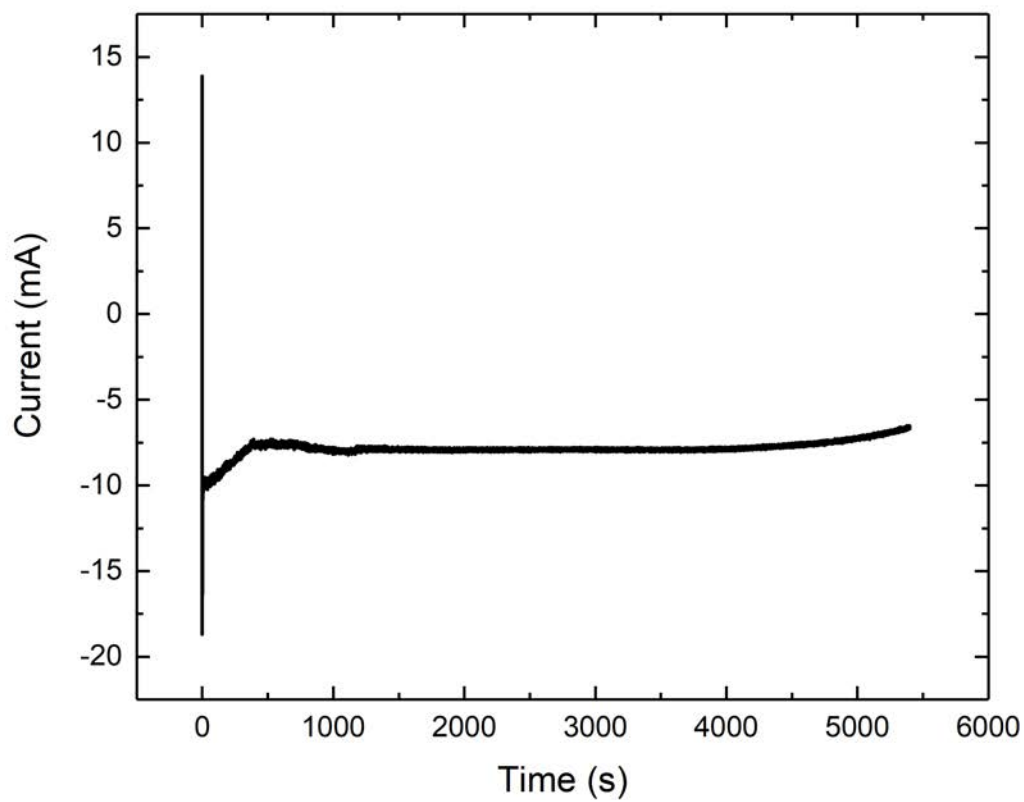

**Figure S59.** Bulk electrolysis data for **1-NCCH<sub>3</sub>** with 10 equiv. of Et<sub>3</sub>NH<sup>+</sup>OTf<sup>-</sup> polarized at -1.75 V (CH<sub>3</sub>CN, 0.1 M [<sup>n</sup>Bu<sub>4</sub>N][PF<sub>6</sub>], 100 mV/s).

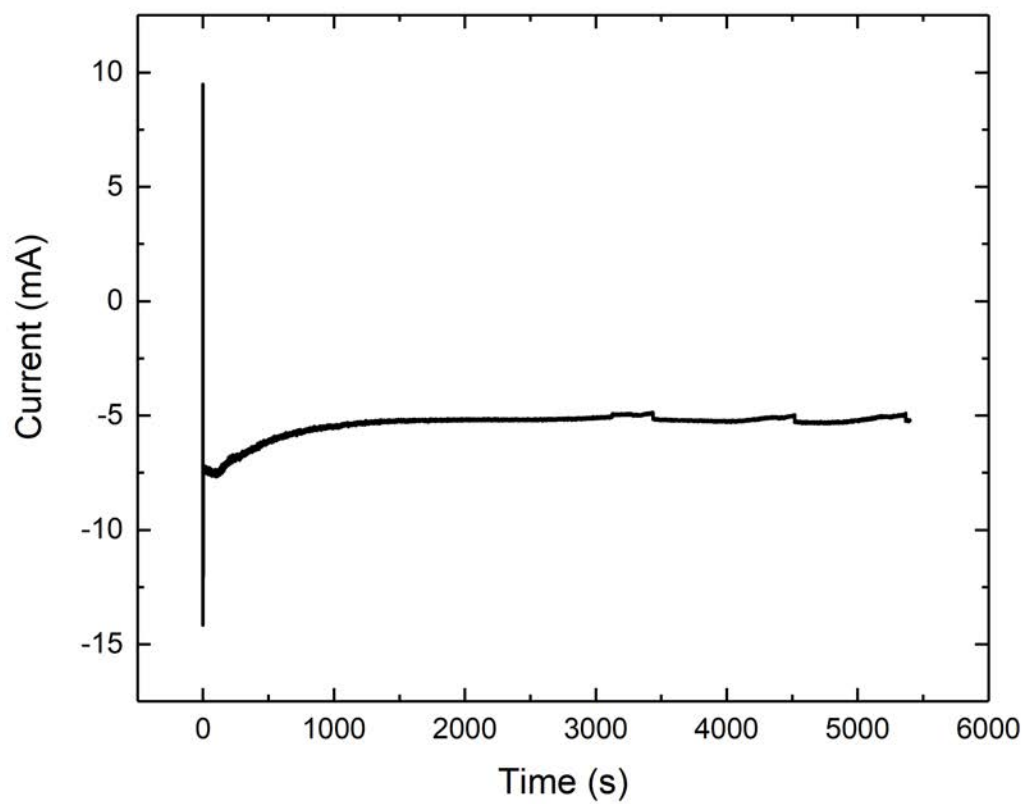

**Figure S60.** Bulk electrolysis data for **1-Cl** with 10 equiv. of  $\text{Et}_3\text{NH}^+\text{OTf}^-$  polarized at  $-1.75$  V ( $\text{CH}_3\text{CN}$ ,  $0.1$  M  $[\text{nBu}_4\text{N}][\text{PF}_6]$ ,  $100$  mV/s).

## **X-ray crystallography**

### *Refinement Details for 1-Cl, 2 and 3.*

Sets of diffraction data [16617 (**1-Cl**), 25594 (**2**) and 17776 (**3**) reflections using 1°-wide  $\omega$ - or  $\phi$ -scan frames with scan times of 4-6 seconds (**1-Cl**), 5 seconds (**2**) or 4-6 seconds (**3**)] were collected<sup>1</sup> for single-domain crystals of **1-Cl**, **2**, and **3** using monochromated Cu K $\alpha$  radiation ( $\lambda$ =1.54178 Å) on a Bruker Proteum Single Crystal Diffraction System with dual CCD detectors and associated Helios high-brilliance multilayer optics and a shared Bruker MicroSTAR microfocus Cu rotating anode x-ray source operating at 45 kV and 60 mA. Data for both compounds were collected with an Apex II CCD detector. The integrated data were corrected empirically for variable absorption effects using equivalent reflections.<sup>2</sup> The Bruker software package SHELXTL was used to solve both structures using “direct methods” techniques.<sup>3</sup> All stages of weighted full-matrix least-squares refinement were conducted using F<sub>o</sub><sup>2</sup> data using the Olex software package<sup>4</sup> equipped with SHELXTL XL v2014.<sup>5</sup> Final crystallographic details are summarized in Table S1.

In the structure of **3**, the Rh-bound hydride ligand (H41) was located as residual electron density in the Fourier difference map; it was therefore included in the model as an isotropic atom and its position was freely refined.

**Table S1.** Crystal and Refinement Data for [Cp\*Rh(QPN)(Cl)]<sup>+</sup> [OTf] (**1-Cl**), [Cp\*Rh(QPN)] (**2**) and [Cp\*Rh(QPN)(H)]<sup>+</sup> [OTf] (**3**).

|                            | <b>1-Cl</b>                                                           | <b>2</b>                                                      | <b>3</b>                                                            |
|----------------------------|-----------------------------------------------------------------------|---------------------------------------------------------------|---------------------------------------------------------------------|
| CCDC number                | 1858635                                                               | 1858633                                                       | 1858634                                                             |
| Empirical formula          | C <sub>32</sub> H <sub>31</sub> ClF <sub>3</sub> NO <sub>3</sub> PRhS | C <sub>31</sub> H <sub>31</sub> NPRh                          | C <sub>32</sub> H <sub>32</sub> F <sub>3</sub> NO <sub>3</sub> PRhS |
| Formula weight             | 735.97                                                                | 551.45                                                        | 701.52                                                              |
| Temperature                | 199.99                                                                | 296.15                                                        | 199.99                                                              |
| Wavelength                 | 1.54178                                                               | 1.54178                                                       | 0.71073                                                             |
| Crystal system             | monoclinic                                                            | monoclinic                                                    | triclinic                                                           |
| Space group                | P2 <sub>1</sub> /n                                                    | P2 <sub>1</sub> /n                                            | P-1                                                                 |
| <i>a</i>                   | 12.9399(2) Å                                                          | 9.0754(2) Å                                                   | 10.5485(9) Å                                                        |
| <i>b</i>                   | 15.7672(3) Å                                                          | 17.3941(4) Å                                                  | 10.5301(9) Å                                                        |
| <i>c</i>                   | 15.3994(3) Å                                                          | 16.7425(4) Å                                                  | 14.8517(12) Å                                                       |
| <i>α</i>                   | 90                                                                    | 90                                                            | 70.4770(10)                                                         |
| <i>β</i>                   | 94.0144(6)                                                            | 101.7270(10)                                                  | 76.8720(10)                                                         |
| <i>γ</i>                   | 90                                                                    | 90                                                            | 82.9990(10)                                                         |
| Volume                     | 3134.17(10) Å <sup>3</sup>                                            | 2587.78(10) Å <sup>3</sup>                                    | 1512.3(2) Å <sup>3</sup>                                            |
| Z                          | 4                                                                     | 4                                                             | 2                                                                   |
| Density (calculated)       | 1.560 g/cm <sup>3</sup>                                               | 1.415 g/cm <sup>3</sup>                                       | 1.541 g/cm <sup>3</sup>                                             |
| Absorption coefficient     | 6.747 mm <sup>-1</sup>                                                | 6.053 mm <sup>-1</sup>                                        | 0.739 mm <sup>-1</sup>                                              |
| F(000)                     | 1496.0                                                                | 1136.0                                                        | 716.0                                                               |
| Crystal size               | 0.14 × 0.085 × 0.045 mm <sup>3</sup>                                  | 0.17 × 0.085 × 0.03 mm <sup>3</sup>                           | 0.24 × 0.23 × 0.08 mm <sup>3</sup>                                  |
| Theta range                | 8.036 to 140.37                                                       | 7.41 to 140.456                                               | 3.97 to 61.508                                                      |
| Index ranges               | -14 ≤ <i>h</i> ≤ 15, -18 ≤ <i>k</i> ≤ 18, -15 ≤ <i>l</i> ≤ 18         | -10 ≤ <i>h</i> ≤ 8, -20 ≤ <i>k</i> ≤ 21, -20 ≤ <i>l</i> ≤ 18  | -14 ≤ <i>h</i> ≤ 15, -14 ≤ <i>k</i> ≤ 15, -21 ≤ <i>l</i> ≤ 21       |
| Reflections collected      | 16617                                                                 | 25594                                                         | 17776                                                               |
| Independent reflections    | 5720 [R <sub>int</sub> = 0.0311, R <sub>sigma</sub> = 0.0311]         | 4692 [R <sub>int</sub> = 0.0276, R <sub>sigma</sub> = 0.0208] | 8957 [R <sub>int</sub> = 0.0380, R <sub>sigma</sub> = 0.0681]       |
| Absorption correction      | Multi-scan                                                            | Multi-scan                                                    | Multi-scan                                                          |
| Max. and min. transmission | 0.7533, 0.5664                                                        | 0.839, 0.426                                                  | 0.943, 0.842                                                        |

| Refinement method                    | Full-matrix least-squares on $F^2$  | Full-matrix least-squares on $F^2$  | Full-matrix least-squares on $F^2$  |
|--------------------------------------|-------------------------------------|-------------------------------------|-------------------------------------|
| Data / restraints / parameters       | 5720/0/393                          | 4692/0/313                          | 8957/0/452                          |
| Goodness-of-fit on $F^2$             | 1.072                               | 1.094                               | 0.914                               |
| Final R indices [ $I > 2\sigma(I)$ ] | $R_1 = 0.0325$ ,<br>$wR_2 = 0.0837$ | $R_1 = 0.0212$ ,<br>$wR_2 = 0.0536$ | $R_1 = 0.0466$ ,<br>$wR_2 = 0.1251$ |
| R indices (all data)                 | $R_1 = 0.0342$ ,<br>$wR_2 = 0.0852$ | $R_1 = 0.0217$ ,<br>$wR_2 = 0.0539$ | $R_1 = 0.0728$ ,<br>$wR_2 = 0.1485$ |
| Largest diff. peak and hole          | 1.24 and -0.76 $e^-/\text{\AA}^3$   | 0.30 and -0.41 $e^-/\text{\AA}^3$   | 1.35/-0.98 $e^-/\text{\AA}^3$       |

<sup>a</sup>  $R_1 = \sum ||F_o| - |F_c|| / \sum |F_o|$     <sup>b</sup>  $wR_2 = [ \sum [w(F_o^2 - F_c^2)^2] / \sum [w(F_o^2)^2] ]^{1/2}$

**Table S2.** Selected Bond Lengths for **1-Cl**, **2** and **3**.

| Bond   | <b>1-Cl</b> | <b>2</b>   | <b>3</b>  |
|--------|-------------|------------|-----------|
| Rh–Cl  | 2.3784(9)   | —          | —         |
| Rh–P   | 2.260(9)    | 2.1744(4)  | 2.2486(8) |
| Rh–N   | 2.140(3)    | 2.0294(13) | 2.093(3)  |
| Rh–Cp* | 1.830       | 1.917      | 1.862     |
| Rh–H41 | —           | —          | 1.48(4)   |



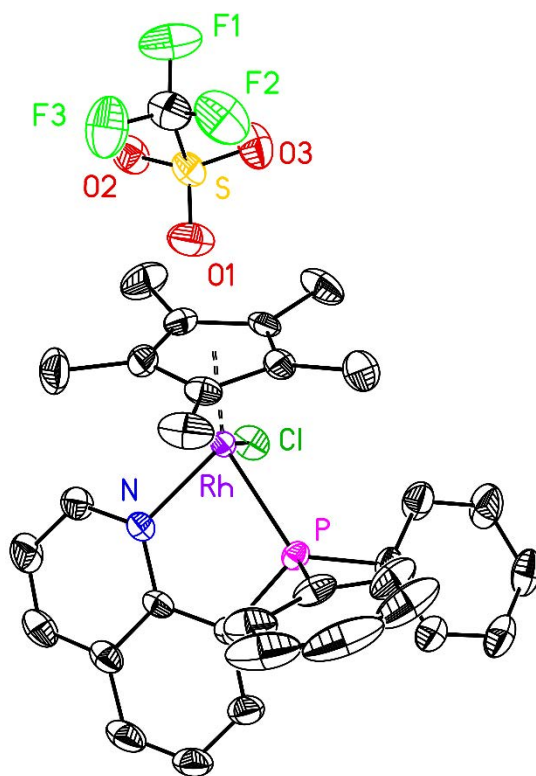

**Figure S61.** Full solid-state structure of **1-Cl**. Hydrogen atoms omitted for clarity. Displacement ellipsoids shown at the 50% probability level.

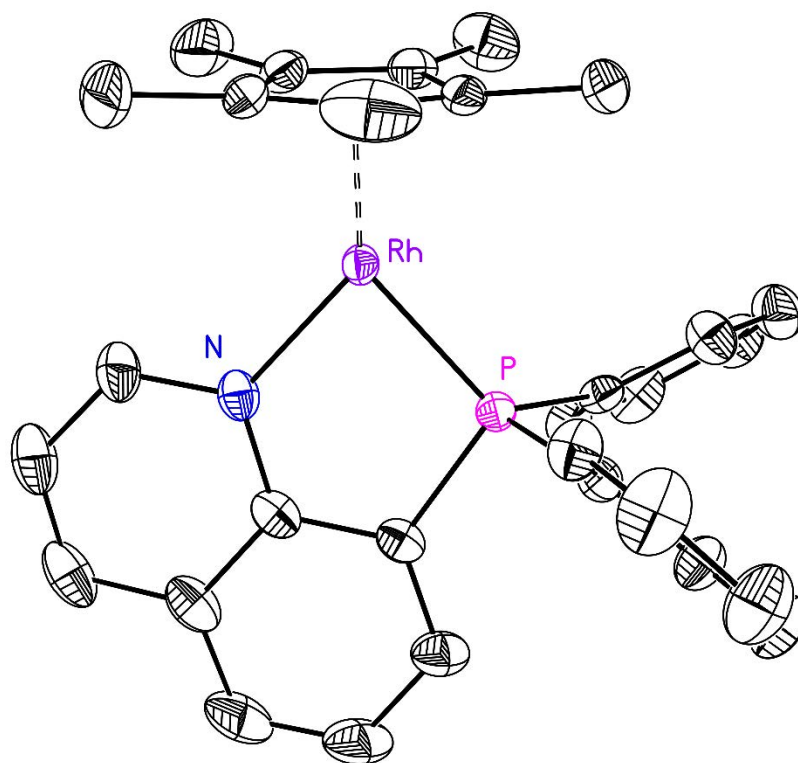

**Figure S62.** Full solid-state structure of **2**. Hydrogen atoms omitted for clarity. Displacement ellipsoids shown at the 50% probability level.

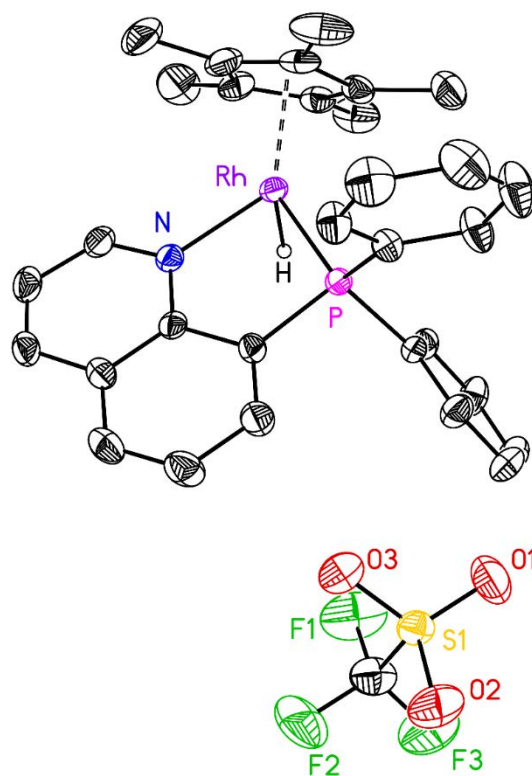

**Figure S63.** Full solid-state structure of **3**. Hydrogen atoms except for H41 omitted for clarity. Displacement ellipsoids shown at the 50% probability level.

## References

1. *APEX2, Version 2 User Manual, M86-E01078*,. Bruker Analytical X-ray Systems: Madison, WI, June 2006.
2. Sheldrick, G. M. *SADABS (version 2008/1): Program for Absorption Correction for Data from Area Detector Frames*, University of Göttingen 2008.
3. Sheldrick, G., SHELXT - Integrated space-group and crystal-structure determination. *Acta Crystallogr., Sect. A: Found. Crystallogr.* **2015**, *71*, 3-8.
4. Dolomanov, O. V.; Bourhis, L. J.; Gildea, R. J.; Howard, J. A. K.; Puschmann, H., OLEX2: a complete structure solution, refinement and analysis program. *J. Appl. Crystallogr.* **2009**, *42*, 339-341.
5. Sheldrick, G., Crystal structure refinement with SHELXL. *Acta Crystallogr., Sect. C: Cryst. Struct. Commun.* **2015**, *71*, 3-8.
